# Supplementary material for: A highly efficient kinetic resolution of Morita–Baylis–Hillman adducts achieved by N–Ar axially chiral Pd-complexes catalyzed asymmetric allylation
Source: Royal Society of Chemistry journal article supplement (doi:10.1039/c1cc15543a), 2011-01-01

## Supporting Information

### A Highly Efficient Kinetic Resolution of Morita-Baylis-Hillman Adducts Achieved by N-Ar Axially Chiral Pd-Complexes Catalyzed Asymmetric Allylation

Feijun Wang,<sup>1,\*</sup> Shengke Li,<sup>1</sup> Mingliang Qu,<sup>1</sup> Mei-Xin Zhao,<sup>1</sup> Lian-Jun Liu,<sup>1</sup> and Min Shi<sup>1,2,\*</sup>

<sup>1</sup>Key Laboratory for Advanced Materials and Institute of Fine Chemicals, School of Chemistry & Molecular Engineering, East China University of Science and Technology, and 130 MeiLong Road, Shanghai 200237, People's Republic of China, and <sup>2</sup>State Key Laboratory of Organometallic Chemistry, Shanghai Institute of Organic Chemistry, Chinese Academy of Sciences, 354 Fenglin Road, Shanghai 200032, People's Republic of China

[feijunwang@ecust.edu.cn](mailto:feijunwang@ecust.edu.cn), [Mshi@mail.sioc.ac.cn](mailto:Mshi@mail.sioc.ac.cn)

#### CONTENTS

|                                                                                                            |     |
|------------------------------------------------------------------------------------------------------------|-----|
| General remarks.....                                                                                       | S2  |
| Synthesis of axially chiral ligands (a <i>S,S</i> )- <b>S6</b> and (a <i>R,S</i> )- <b>S6</b> .....        | S3  |
| Synthesis of axially chiral Pd complexes (a <i>S,S</i> )- <b>2</b> .....                                   | S12 |
| Table S1 Screening of the amount of PhB(OH) <sub>2</sub> and NEt <sub>3</sub> .....                        | S16 |
| General procedure for the Pd(II)-catalyzed asymmetric allylic alkylation of <b>4a</b> with <b>3a</b> ..... | S16 |
| References.....                                                                                            | S75 |
| X-ray crystal data of product (a <i>S,S</i> )- <b>2a</b> .....                                             | S76 |
| X-ray crystal data of product ( <i>R</i> )- <b>5hf</b> .....                                               | S77 |

**General remarks.** Dichloromethane was freshly distilled from calcium hydride; THF and toluene were distilled from sodium (Na) under argon (Ar) atmosphere. Melting points were determined on a digital melting point apparatus and temperatures were uncorrected.  $^1\text{H}$  NMR and  $^{13}\text{C}$  NMR spectra were recorded on a Bruker AM-300 or AM-400 spectrophotometers. Infrared spectra were recorded on a Perkin-Elmer PE-983 spectrometer with absorption in  $\text{cm}^{-1}$ . Flash column chromatography was performed using 300-400 mesh silica gel. For thin-layer chromatography (TLC), silica gel plates (Huanghai GF<sub>254</sub>) were used. Elementary analysis was taken on a Carlo-Erba 1106 analyzer. Mass spectra were recorded by EI and ESI, and HRMS were measured on a HP-5989 instrument. Optical rotations were determined at 589 nm (sodium D line) by using a Perkin-Elmer-341 MC digital polarimeter;  $[\alpha]_{\text{D}}$ -values are given in unit of  $10 \text{ deg}^{-1} \text{ cm}_2 \text{ g}^{-1}$ . Chiral HPLC was performed on a SHIMADZU SPD-10A *vp* series with chiral columns (Chiralpak AD-H, OD-H and OJ-H columns  $4.6 \times 250 \text{ mm}$ , Daicel Chemical Ind., Ltd.).

## Synthesis of axially chiral ligands (aS,S)-S6 and (aR,S)-S6.

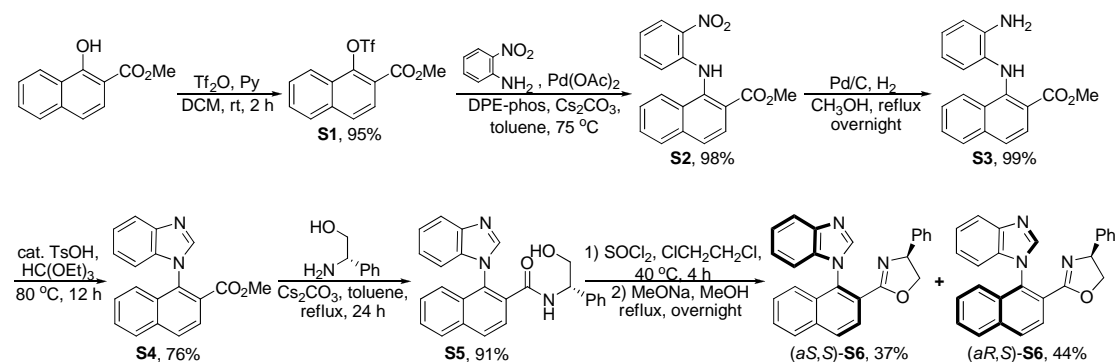

### Methyl 1-(trifluoromethylsulfonyloxy)-2-naphthoate **S1**.<sup>[1]</sup>

Trifluoromethanesulfonic anhydride (1.1 mL, 6.5 mmol) was added dropwise to the solution of methyl 1-hydroxy-2-naphthoate (1.01 g, 5.0 mmol) and pyridine (0.5 mL, 6.2 mol) in dried  $\text{CH}_2\text{Cl}_2$  (12 mL) at  $0^\circ\text{C}$ , and the resulting solution was stirred for 2 h at room temperature. The reaction mixture was diluted with  $\text{CH}_2\text{Cl}_2$ , and washed with water and saturated sodium bicarbonate solution. The organic layer was dried over  $\text{MgSO}_4$ . The solvent was removed under reduced pressure and the crude product was purified by flash chromatography (ethyl acetate/petroleum ether = 1/16) to afford **S1** as light yellow solid in 95% yield (1.59 g, 4.75 mmol).  $^1\text{H}$  NMR(400 MHz,  $\text{CDCl}_3$ )  $\delta$  4.02 (s, 3H), 7.67-7.71 (m, 2H), 7.90-7.94 (m, 2H), 8.00 (d,  $J = 8.8$  Hz, 1H), 8.18-8.20 (m, 1H).  $^{13}\text{C}$  NMR(100 MHz,  $\text{CDCl}_3$ )  $\delta$  52.8, 113.8, 117.0, 120.2, 121.4, 122.1, 123.4, 126.2, 128.0, 128.1, 128.2, 129.1, 136.6, 144.7, 165.3.  $^{19}\text{F}$  NMR(470 MHz,  $\text{CDCl}_3$ )  $\delta$  -73.0; MS (ESI)  $m/z$  (%): 333.0 (M-H, 100); HRMS (Micromass LCT) Calcd. for  $\text{C}_{13}\text{H}_8\text{O}_5\text{SF}_3$ : 333.0045; Found: 333.0044.

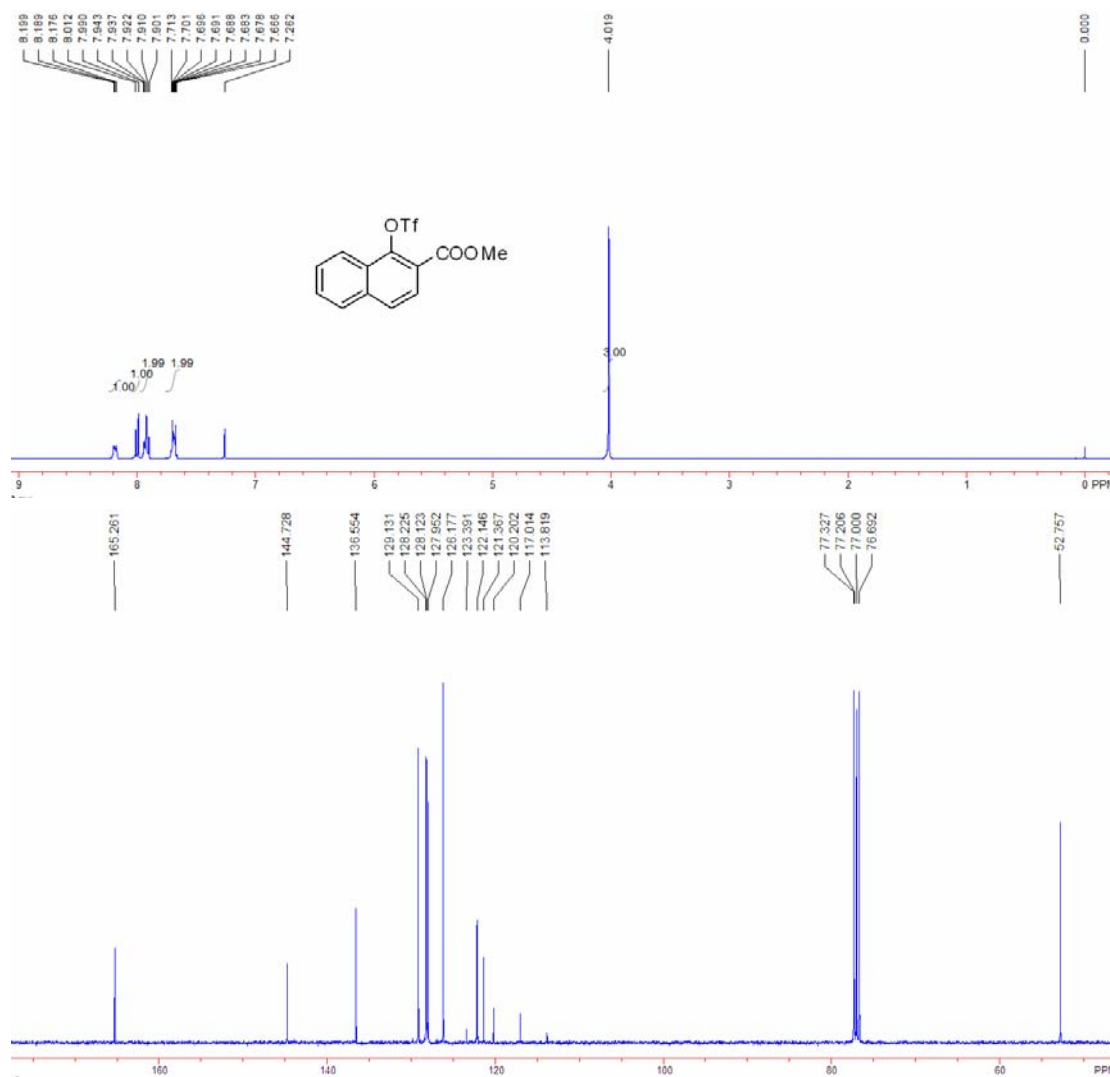

#### Methyl 1-(2-nitrophenylamino)-2-naphthoate **S2**.

Methyl 1-(trifluoromethylsulfonyloxy)-2-naphthoate **S1** (0.67 g, 2.0 mmol), 2-nitroaniline (0.30 g, 2.2 mmol), Pd(OAc)<sub>2</sub> (22.5 mg, 0.1 mmol), DPE-phos (108.0 mg, 0.2 mmol), and Cs<sub>2</sub>CO<sub>3</sub> (0.98 g, 3.0 mmol) were stirred in anhydrous toluene (10 mL) at 75 °C until the reaction was completed. The reaction mixture was cooled to room temperature, and was filtrated by diatomite. The filtrate was washed with water, extracted with DCM (3 x 20 mL) and dried over anhydrous MgSO<sub>4</sub>. The solvent was removed under reduced pressure and the residue was purified by a silica gel flash column chromatography (ethyl acetate/petroleum ether = 1/10) to afford the desired product **S2** as orange solid in 98% yield (0.63 g, 1.96 mmol). Mp. 141.6-142.9 °C; IR (direct irradiation)  $\nu$  630, 760, 810, 890, 962, 1034, 1135, 1205, 1284, 1344, 1422,

1728, 2960, 3082  $\text{cm}^{-1}$ ;  $^1\text{H}$  NMR (400 MHz,  $\text{CDCl}_3$ , TMS)  $\delta$  3.90 (s, 3H), 6.34 (d,  $J$  = 8.4 Hz, 1H), 6.78-6.82 (m, 1H), 7.15-7.19 (m, 1H), 7.43-7.47 (m, 1H), 7.58-7.62 (m, 1H), 7.81 (d,  $J$  = 8.4 Hz, 1H), 7.91 (t,  $J$  = 7.2 Hz, 2H), 8.05 (d,  $J$  = 8.4 Hz, 1H), 8.24 (dd,  $J$  = 1.6, 8.4 Hz, 1H), 10.48 (s, 1H);  $^{13}\text{C}$  NMR (100 MHz,  $\text{CDCl}_3$ , TMS)  $\delta$  52.4, 117.4, 118.1, 122.5, 125.5, 126.2, 126.35, 126.37, 127.0, 128.4, 128.5, 129.3, 134.4, 135.0, 136.1, 137.9, 143.3, 167.0; MS (ESI)  $m/z$  (%): 323.1 ( $M + H$ , 21); HRMS (Micromass LCT) Calcd. for  $\text{C}_{18}\text{H}_{15}\text{N}_2\text{O}_4$ : 323.1032; Found: 323.1036.

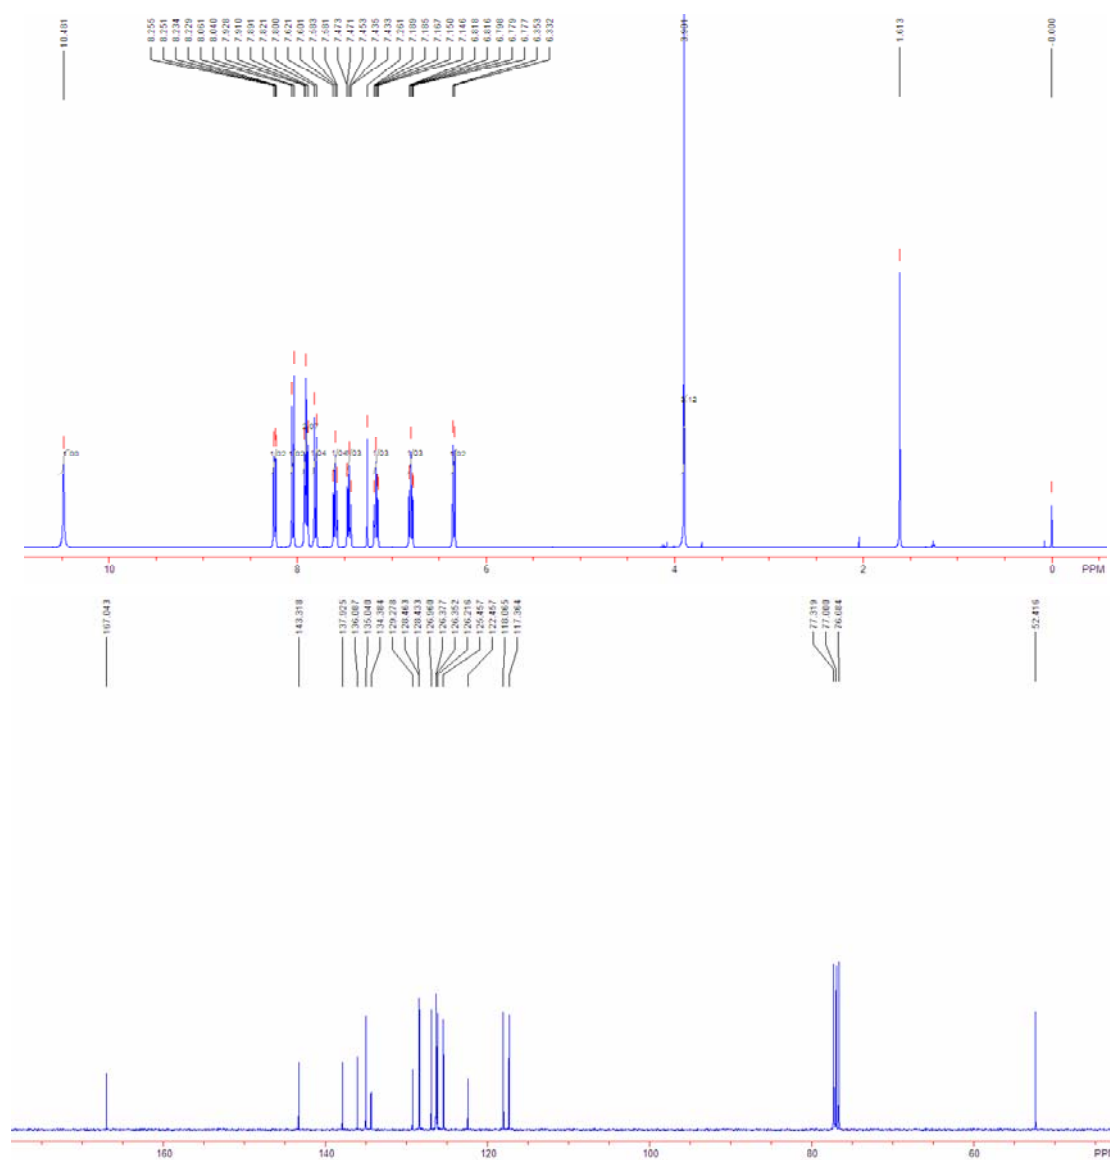

### Methyl 1-(2-aminophenylamino)-2-naphthoate **S3**.

A mixture of **S2** (0.97 g, 3.0 mmol), 10% Pd-C (0.32 g) in a solution of MeOH (14 mL) were stirred overnight under reflux in 1 atm of  $\text{H}_2$ . After cooling to room

temperature, Pd-C was removed by filtration, and the resulting solution was evaporated to remove solvent under reduced pressure. The residue was purified by a silica gel flash column chromatography (ethyl acetate/petroleum ether = 1/10, 1% NEt<sub>3</sub> added) to afford the desired product **S3** as yellow solid in 99% yield (0.87 g, 2.97 mmol). Mp. 134.3-136.1 °C; IR (direct irradiation)  $\nu$  713, 740, 760, 788, 1138, 1208, 1243, 1270, 1341, 1496, 1569, 1669, 3337, 3440 cm<sup>-1</sup>; <sup>1</sup>H NMR (CDCl<sub>3</sub>, 400 MHz, TMS)  $\delta$  3.93 (s, 3H), 4.06 (br s, 2H), 6.41 (d,  $J$  = 8.0 Hz, 1H), 6.47-6.51 (m, 1H), 6.81-6.89 (m, 2H), 7.20-7.25 (m, 1H), 7.41-7.48 (m, 2H), 7.77 (t,  $J$  = 8.0 Hz, 2H), 7.98 (d,  $J$  = 8.8 Hz, 1H), 9.23 (s, 1H); <sup>13</sup>C NMR (CDCl<sub>3</sub>, 100 MHz, TMS)  $\delta$  52.0, 113.6, 115.6, 118.6, 121.0, 121.4, 123.8, 125.1, 125.9, 126.5, 126.7, 128.1, 128.2, 133.2, 136.8, 139.3, 147.6, 169.1; MS (ESI)  $m/z$  (%): 293.1 (M + H, 100); HRMS (Micromass LCT) Calcd. for C<sub>18</sub>H<sub>17</sub>N<sub>2</sub>O<sub>2</sub>: 293.1290; Found: 293.1294.

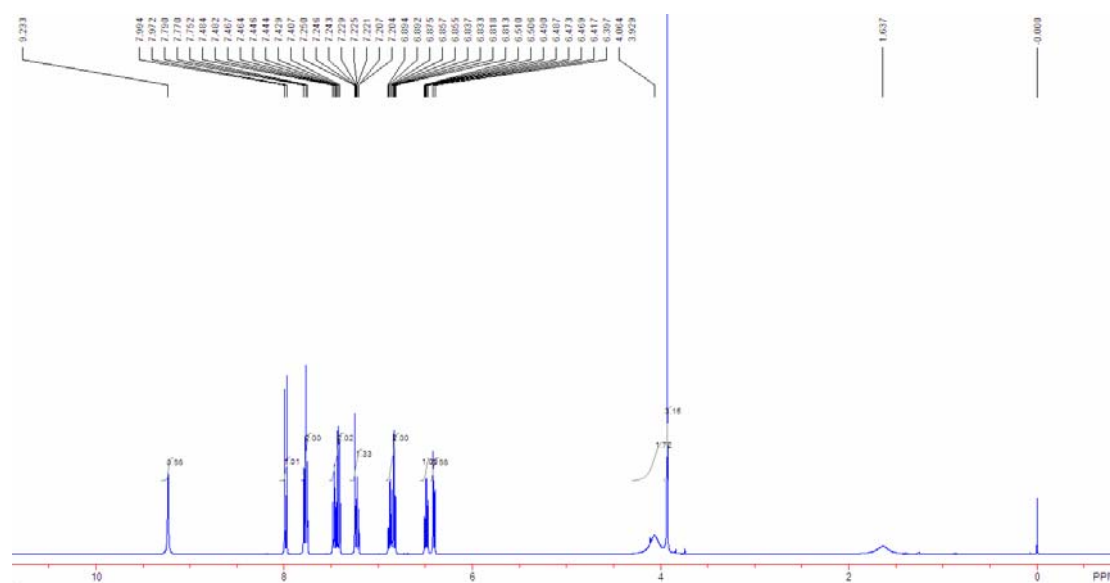

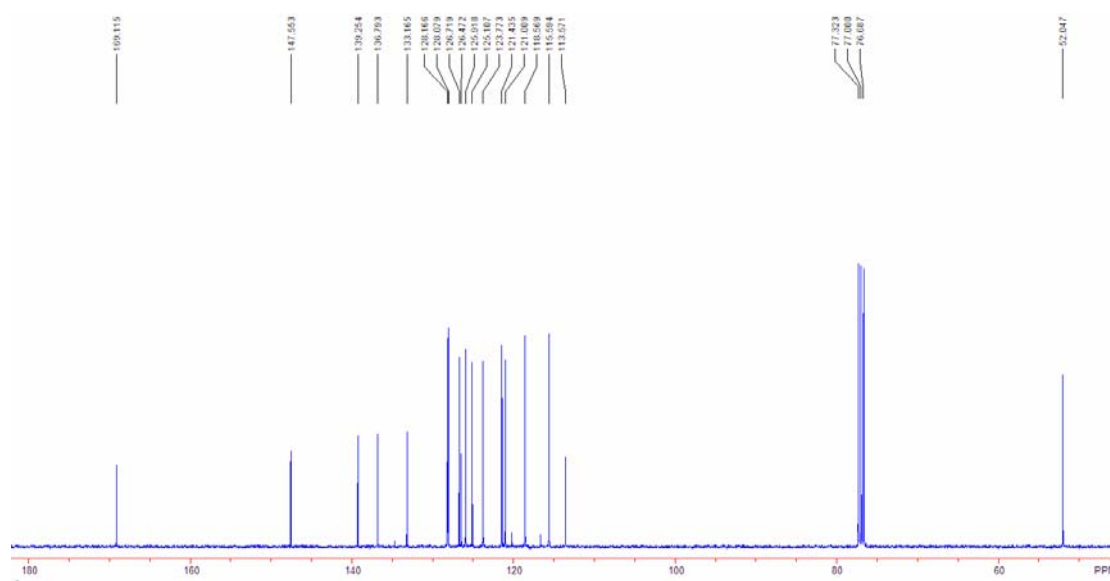

#### Methyl 1-(1*H*-benzo[d]imidazol-1-yl)-2-naphthoate **S4**.

The compound **S3** (0.88 g, 3.0 mmol) and triethyl orthoformate [HC(OC<sub>2</sub>H<sub>5</sub>)<sub>3</sub>] (8.0 mL) containing a catalytic amount of TsOH were heated at 80 °C until the compound **S3** was consumed. After cooling to room temperature, ethyl acetate was added to form an azeotropic solution in order to remove the excess amount of triethyl orthoformate under reduced pressure. The residue was purified by a silica gel flash column chromatography (ethyl acetate/petroleum ether = 1/3) to afford the desired product **S4** in 76% yield (0.69 g, 2.28 mmol). Viscous brown solid; Mp. 115.0-116.7 °C; IR (direct irradiation)  $\nu$  683, 750, 766, 1138, 1161, 1190, 1223, 1237, 1270, 1431, 1454, 1486, 1718, 2951 cm<sup>-1</sup>; <sup>1</sup>H NMR (CDCl<sub>3</sub>, 400 MHz, TMS)  $\delta$  3.51 (s, 3H), 6.92 (d, *J* = 8.4 Hz, 1H), 7.22 (t, *J* = 8.0 Hz, 1H), 7.34 (t, *J* = 8.0 Hz, 2H), 7.49 (t, *J* = 8.0 Hz, 1H), 7.66 (t, *J* = 7.6 Hz, 1H), 7.95 (d, *J* = 8.0 Hz, 1H), 8.02 (d, *J* = 8.4 Hz, 1H), 8.04 (s, 1H), 8.11 (s, 2H); <sup>13</sup>C NMR (CDCl<sub>3</sub>, 100 MHz)  $\delta$  52.5, 110.1, 120.3, 122.5, 123.6, 123.9, 126.1, 126.9, 128.2, 128.4, 128.8, 129.7, 130.7, 132.5, 135.7, 136.1, 143.0, 144.1, 165.8; MS (ESI) *m/z* (%): 303.1 (M + H, 100); HRMS (Micromass LCT) Calcd. for C<sub>19</sub>H<sub>15</sub>N<sub>2</sub>O<sub>2</sub>: 303.1134; Found: 303.1134.





1136, 1231, 1306, 1270, 1491, 1455, 1649, 1721, 3055, 3194  $\text{cm}^{-1}$ ;  $^1\text{H}$  NMR ( $\text{CDCl}_3$ , 400 MHz, TMS)  $\delta$  2.23 (br s, 2H), 3.31-3.37 (m, 1H), 3.40-3.48 (m, 1H), 4.86-4.90 (m, 1H), 6.00 (d,  $J = 7.2$  Hz, 0.50H), 6.55 (d,  $J = 7.6$  Hz, 0.46H), 6.65-6.67 (m, 1H), 6.82-6.85 (m, 1H), 7.01 (d,  $J = 8.0$  Hz, 0.54H), 7.04 (d,  $J = 8.0$  Hz, 0.50H), 7.08-7.15 (m, 3H), 7.19-7.25 (m, 1H), 7.33 (t,  $J = 7.2$  Hz, 0.52H), 7.39 (t,  $J = 7.6$  Hz, 0.56H), 7.46 (d,  $J = 7.6$  Hz, 0.50H), 7.50 (d,  $J = 8.0$  Hz, 0.53H), 7.61-7.65 (m, 1H), 7.82-7.89 (m, 2H), 7.97-8.09 (m, 3H);  $^{13}\text{C}$  NMR ( $\text{CDCl}_3$ , 100 MHz, TMS)  $\delta$  55.7, 55.9, 65.4, 65.6, 110.4, 110.5, 120.5, 120.8, 123.17, 123.23, 123.3, 123.5, 124.3, 124.6, 125.3, 125.5, 126.32, 126.35, 127.57, 127.63, 128.2, 128.29, 128.36, 128.39, 128.46, 128.50, 128.6, 128.7, 128.8, 130.1, 130.22, 130.24, 130.41, 132.83, 132.86, 134.80, 134.84, 135.6, 135.8, 138.2, 142.8, 143.1, 143.9, 144.4, 166.3, 166.5; MS (ESI)  $m/z$  (%): 408.2 (M + H, 100); HRMS (Micromass LCT) Calcd. for  $\text{C}_{26}\text{H}_{22}\text{N}_3\text{O}_2$ : 408.1712; Found: 408.1715.

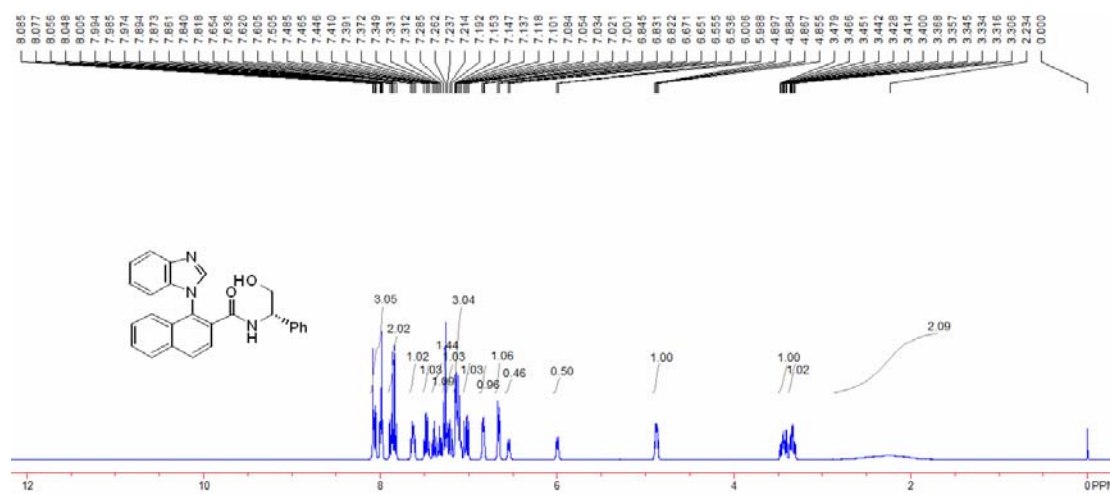

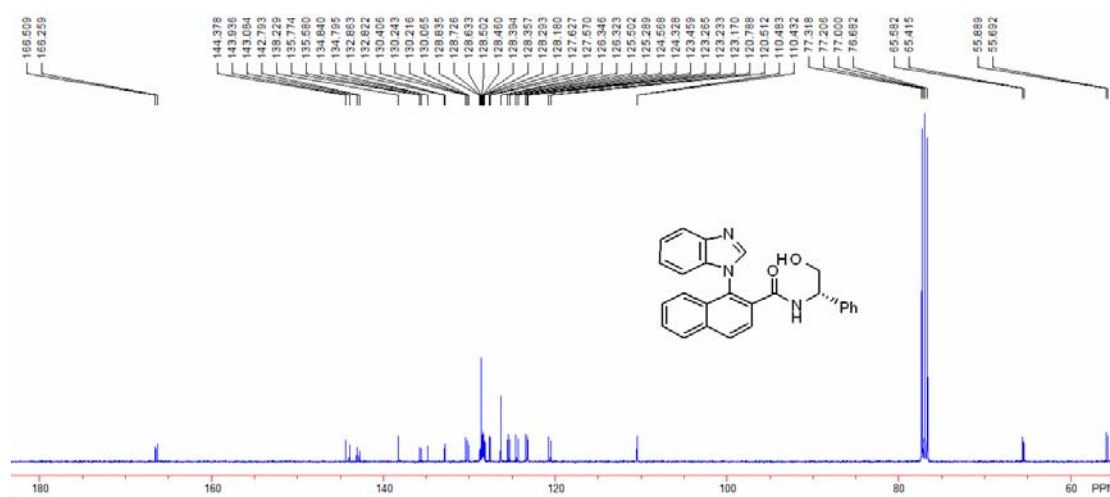

(*S*)-2-((*S*)-1-(1*H*-benzo[d]imidazol-1-yl)naphthalen-2-yl)-4-phenyl-4,5-dihydrooxazole (*aS,S*)-**S6** and (*S*)-2-((*R*)-1-(1*H*-benzo[d]imidazol-1-yl)naphthalen-2-yl)-4-phenyl-4,5-dihydrooxazole (*aR,S*)-**S6**.

SOCl<sub>2</sub> (0.36 mL, 5.1 mol) was slowly added to a solution of diastereomeric mixture **S5** (0.41 g, 1.0 mol) and dried 1,2-dichloroethane (10 mL) at 0 °C. The resulting solution was stirred at 40 °C for 4 h, and then the solvent was removed under reduced pressure. Subsequently, the residue was treated with sodium methoxide (0.43 g, 8.0 mol) in CH<sub>3</sub>OH (15 mL), and stirred overnight under reflux. The resulting mixture was diluted with cold water, and extracted with DCM (3 x 20 mL). The organic layer was washed with brine, and dried over Na<sub>2</sub>SO<sub>4</sub>. After removal of the solvent under reduced pressure, the residue was purified by a silica gel flash column chromatography (ethyl acetate/petroleum ether = 1/2) to afford (*aS,S*)-**S6** (144.1 mg, 0.37 mmol) and (*aR,S*)-**S6** (171.4 mg, 0.44 mmol).

(*aS,S*)-**S6**: White solid, 37% yield; Mp. 186.1-187.9 °C; IR (direct irradiation)  $\nu$  683, 698, 748, 759, 831, 971, 1008, 1106, 1224, 1454, 1471, 1645, 2898, 3073 cm<sup>-1</sup>; [ $\alpha$ ]<sub>D</sub><sup>20</sup> = +112.1 (c 0.70, CHCl<sub>3</sub>); <sup>1</sup>H NMR (CDCl<sub>3</sub>, 400 MHz, TMS)  $\delta$  3.90 (t, *J* = 8.8 Hz, 1H), 4.29 (dd, *J* = 8.4, 10.4 Hz, 1H), 5.15 (dd, *J* = 8.8, 10.4 Hz, 1H), 6.85-6.87 (m, 2H), 6.99 (d, *J* = 8.0 Hz, 1H), 7.19-7.24 (m, 4H), 7.34-7.38 (m, 2H), 7.47-7.51 (m, 1H), 7.63-7.67 (m, 1H), 7.94 (d, *J* = 8.0 Hz, 1H), 8.02 (d, *J* = 8.0 Hz, 1H), 8.10 (d, *J* = 8.4 Hz, 2H), 8.17 (d, *J* = 8.8 Hz, 1H); <sup>13</sup>C NMR (CDCl<sub>3</sub>, 100 MHz, TMS)  $\delta$  69.7, 74.8, 110.3, 120.3, 122.5, 123.57, 123.58, 124.6, 126.3, 126.5, 127.4, 128.25, 128.32, 128.4,

128.6, 129.7, 130.9, 131.7, 135.3, 136.0, 141.5, 143.2, 144.4, 162.9; MS (ESI)  $m/z$  (%): 390.2 (M + H, 71); HRMS (Micromass LCT) Calcd. for C<sub>16</sub>H<sub>20</sub>N<sub>3</sub>O: 390.1606; Found: 390.1611.

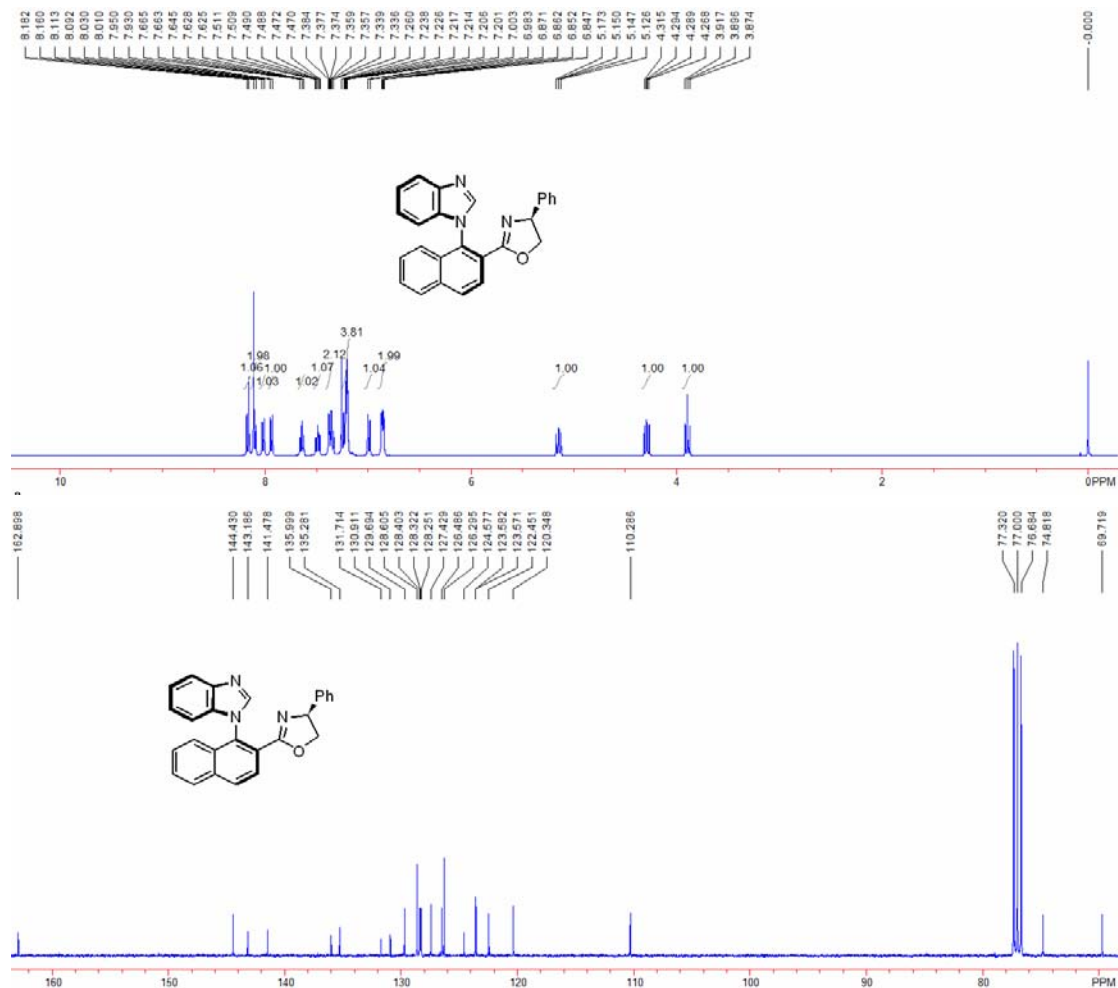

(aR,S)-**S6**: White solid, 44% yield; Mp. 153.6-155.4 °C;  $[\alpha]_D^{20} = -62.5$  (c 0.80, CHCl<sub>3</sub>); <sup>1</sup>H NMR (CDCl<sub>3</sub>, 400 MHz, TMS)  $\delta$  3.64 (t,  $J = 8.8$  Hz, 1H), 4.43 (dd,  $J = 8.8, 10.0$  Hz, 1H), 5.14 (dd,  $J = 9.2, 10.4$  Hz, 1H), 6.92-6.94 (m, 2H), 7.02 (d,  $J = 8.0$  Hz, 1H), 7.21-7.25 (m, 4H), 7.33-7.37 (m, 1H), 7.39 (d,  $J = 8.8$  Hz, 1H), 7.47-7.52 (m, 1H), 7.62-7.67 (m, 1H), 7.94 (d,  $J = 8.4$  Hz, 1H), 8.02 (d,  $J = 8.4$  Hz, 1H), 8.10 (d,  $J = 10.4$  Hz, 2H), 8.15 (d,  $J = 8.8$  Hz, 1H); <sup>13</sup>C NMR (CDCl<sub>3</sub>, 100 MHz, TMS)  $\delta$  69.8, 75.2, 110.4, 120.3, 122.5, 123.5, 123.6, 124.9, 126.6, 126.7, 127.6, 128.28, 128.32, 128.4, 128.6, 129.7, 130.8, 131.7, 135.3, 136.1, 141.3, 143.1, 144.4, 163.5; MS (ESI)



cooling to room temperature, volatiles were removed under reduced pressure to obtain the crude benzimidazolium salt (a*S,S*)-**S7**. Salt (a*S,S*)-**S7**, Pd(OAc)<sub>2</sub> (0.33 g, 1.47 mmol) and KI (0.50 g, 3.0 mmol) were refluxed in THF (25 mL) for 8 h. The volatiles were then removed under reduced pressure and the residue was purified by a silica gel flash column chromatography (dichloromethane/petroleum ether = 6/1-1/0) to give (a*S,S*)-**2** as earth yellow solid.

Complex (a*S,S*)-**2a** (R = Me, 806.7 mg, 71% yield): Mp. > 250 °C; [ $\alpha$ ]<sub>D</sub><sup>20</sup> = +65.8 (c 0.50, CHCl<sub>3</sub>); A single crystal of (a*S,S*)-**2a** suitable for X-ray crystal analysis was obtained by recrystallization from a saturated solution of CH<sub>2</sub>Cl<sub>2</sub>/petroleum ether (1/1, v/v). <sup>1</sup>H NMR (CDCl<sub>3</sub>, 400 MHz, TMS)  $\delta$  3.46 (s, 3H), 4.63 (dd, *J* = 5.6, 9.2 Hz, 1H), 5.06 (t, *J* = 9.6 Hz, 1H), 6.13 (dd, *J* = 5.6, 10.4 Hz, 1H), 6.64 (d, *J* = 8.4 Hz, 1H), 6.92 (d, *J* = 7.2 Hz, 2H), 7.16 (t, *J* = 8.0 Hz, 2H), 7.18-7.23 (m, 1H), 7.37-7.43 (m, 4H), 7.49 (t, *J* = 8.0 Hz, 1H), 7.70 (t, *J* = 7.2 Hz, 1H), 7.96 (d, *J* = 8.4 Hz, 1H), 8.10 (d, *J* = 8.4 Hz, 1H), 8.29 (d, *J* = 8.4 Hz, 1H); <sup>13</sup>C NMR (CDCl<sub>3</sub>, 100 MHz, TMS)  $\delta$  29.6, 36.0, 70.7, 110.7, 112.1, 121.5, 124.3, 124.55, 124.63, 127.2, 128.5, 128.91, 128.94, 129.1, 129.3, 129.5, 130.8, 132.5, 134.3, 135.0, 136.0, 139.0, 163.1, 173.5; MS (ESI) *m/z* (%): 636.0 (M-I, 100); HRMS (Micromass LCT) Calcd. for C<sub>27</sub>H<sub>21</sub>IN<sub>3</sub>OPd: 635.9764; Found: 635.9764.

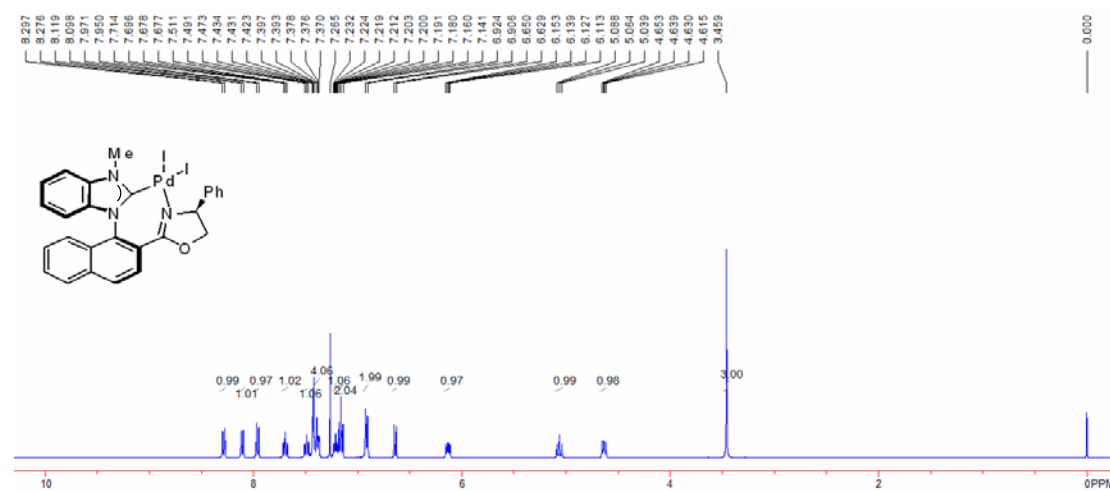

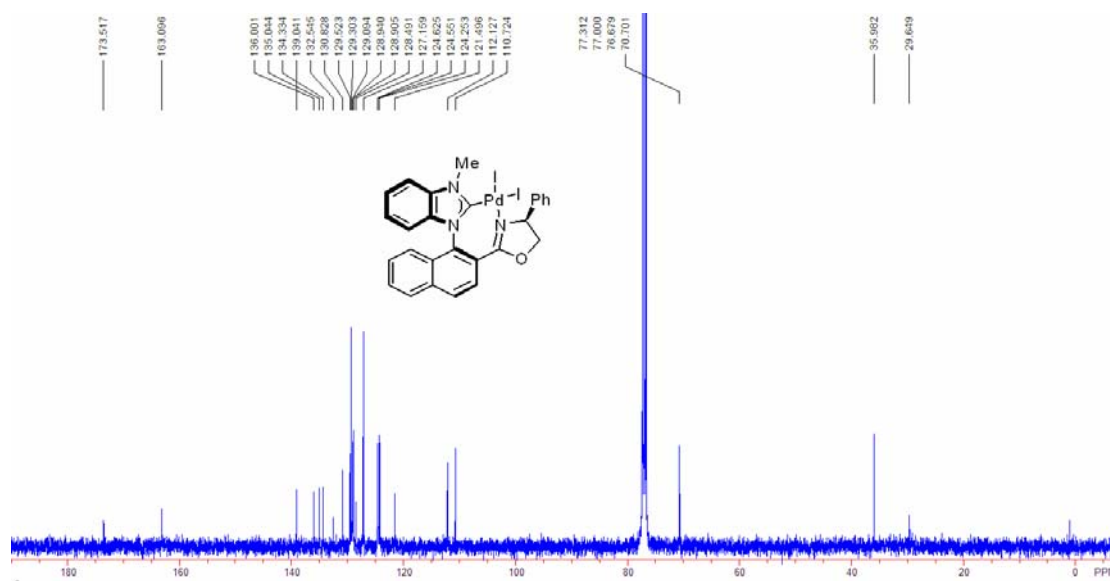

Complex (aS,S)-**4b** (R = Et, 417.6 mg, 36% yield): Mp. > 250 °C;  $[\alpha]_D^{20} +20.8$  (c 0.74, CHCl<sub>3</sub>); <sup>1</sup>H NMR (400 MHz, CDCl<sub>3</sub>) δ 1.36 (t, *J* = 7.2 Hz, 3 H), 3.50-3.59 (m, 1H), 4.53-4.62 (m, 2H), 5.04 (t, *J* = 9.6 Hz, 1 H), 6.16 (dd, *J* = 5.6, 10.0 Hz, 1H), 6.64 (d, *J* = 8.4 Hz, 1 H), 6.89 (d, *J* = 7.2 Hz, 2 H), 7.14 (t, *J* = 7.6 Hz, 2 H), 7.20 (t, *J* = 8.0 Hz, 1 H), 7.34-7.47 (m, 4H), 7.53 (t, *J* = 8.0 Hz, 1 H), 7.73 (t, *J* = 7.2 Hz, 1 H), 7.98 (d, *J* = 8.8 Hz, 1 H), 8.12 (d, *J* = 8.4 Hz, 1 H), 8.27 (d, *J* = 8.4 Hz, 1 H). MS (ESI) *m/z* (%): 650.0 (M-I, 100); HRMS (Micromass LCT) Calcd. for C<sub>28</sub>H<sub>23</sub>IN<sub>3</sub>OPd: 649.9921; Found: 649.9905.

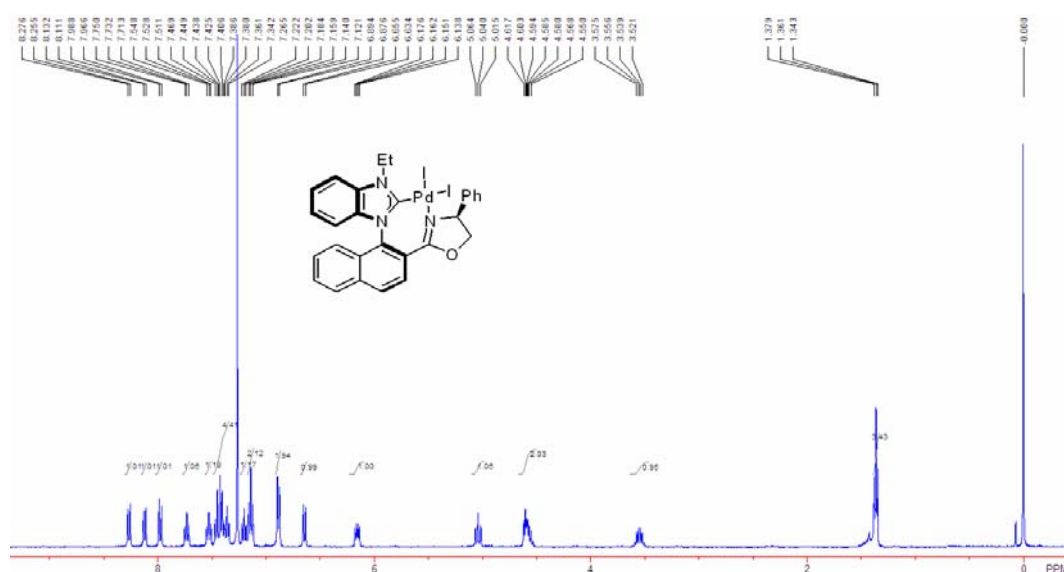

Complex (a*S,S*)-**4c** (R = *i*-Pr, 355.2 mg, 30% yield): Mp. > 250 °C; <sup>1</sup>H NMR (400 MHz, CDCl<sub>3</sub>) δ 0.75 (d, *J* = 7.2 Hz, 3H), 1.65 (d, *J* = 7.2 Hz, 3H), 4.57 (dd, *J* = 5.2, 8.8 Hz, 1H), 5.03 (t, *J* = 10.0 Hz, 1H), 5.73-5.80 (m, 1H), 6.25 (dd, *J* = 5.2, 9.2 Hz, 1H), 6.64 (d, *J* = 8.4 Hz, 1H), 6.95 (d, *J* = 7.6 Hz, 2H), 7.10 (t, *J* = 7.6 Hz, 2H), 7.17 (t, *J* = 8.0 Hz, 1H), 7.23 (d, *J* = 7.6 Hz, 2H), 7.35 (t, *J* = 7.6 Hz, 1H), 7.49 (t, *J* = 7.6 Hz, 1H), 7.63 (d, *J* = 8.4 Hz, 1H), 7.70 (t, *J* = 7.6 Hz, 1H), 8.04 (d, *J* = 8.4 Hz, 1H), 8.10 (d, *J* = 8.4 Hz, 1H), 8.26 (d, *J* = 8.4 Hz, 1H); <sup>13</sup>C NMR (100 MHz, CDCl<sub>3</sub>) δ 19.5, 20.8, 29.7, 55.9, 70.8, 112.7, 113.2, 121.4, 123.9, 124.4, 125.1, 126.9, 128.5, 128.8, 128.9, 129.2, 129.4, 129.5, 130.8, 131.9, 132.6, 136.2, 136.3, 138.8, 164.0, 172.5, 207.1. MS (ESI) *m/z* (%): 636.0 (M-I, 100); HRMS (Micromass LCT) Calcd. for C<sub>29</sub>H<sub>25</sub>IN<sub>3</sub>OPd: 664.0077; Found: 664.0073.

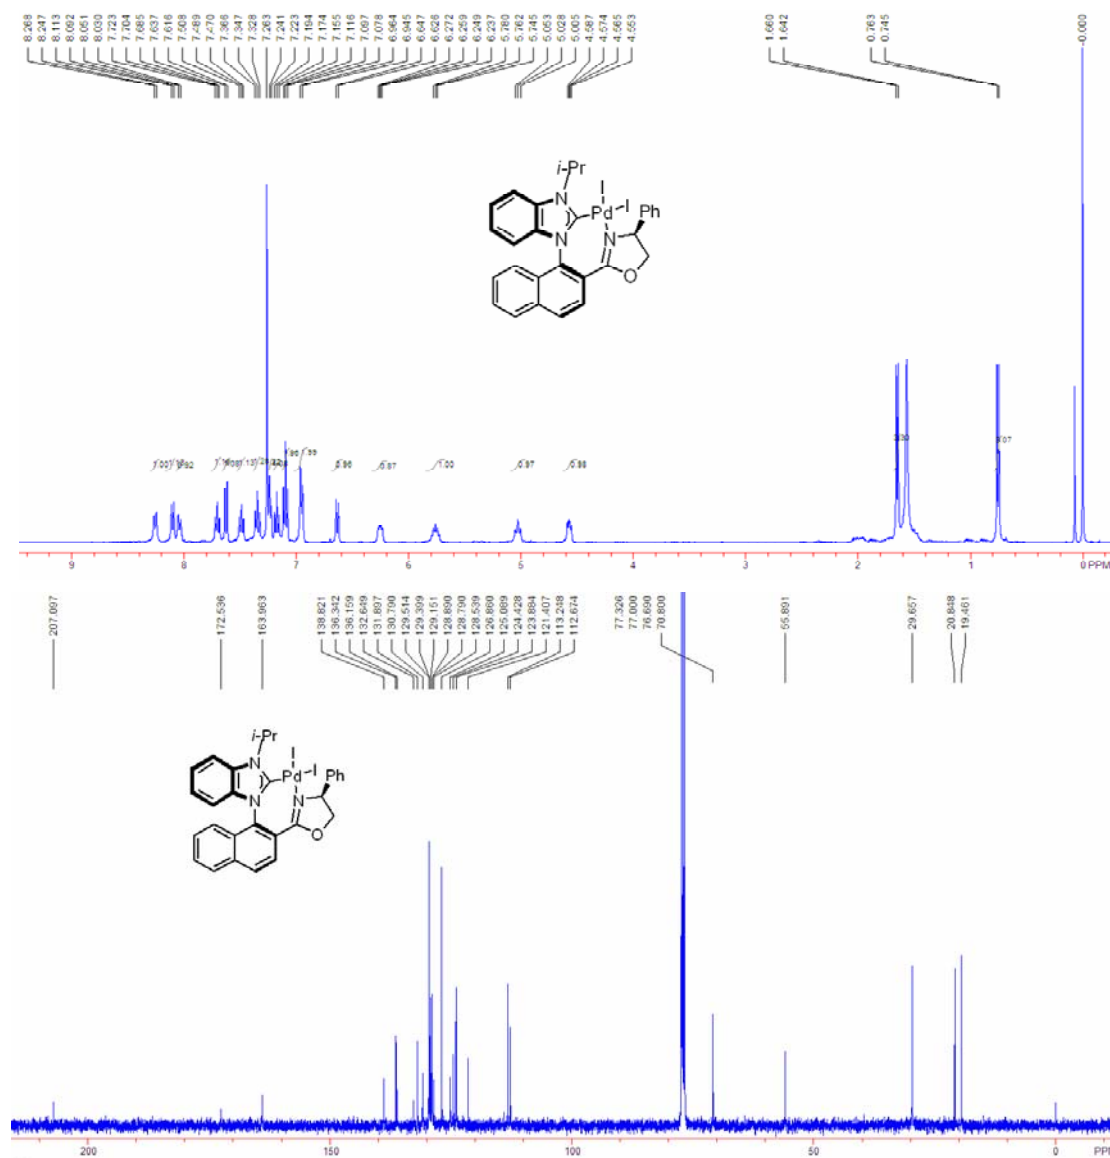



**Table S1** Screening of the amount of PhB(OH)<sub>2</sub> and NEt<sub>3</sub>.<sup>a</sup>

(*rac*)-**3a**  $\xrightarrow[\text{AgOTf, NEt}_3, \text{RT, 24 h}]{15 \text{ mol\% (aS,S)-2a, PhB(OH)}_2 \text{ 4a, CH}_3\text{CN}}$  **5aa**

| Entry | amount of PhB(OH) <sub>2</sub> | amount of NEt <sub>3</sub> | Conv. <sup>b</sup> [%] | <b>5aa</b>             |                     | Recovered <b>3a</b>    |                     |
|-------|--------------------------------|----------------------------|------------------------|------------------------|---------------------|------------------------|---------------------|
|       |                                |                            |                        | Yield <sup>c</sup> [%] | ee <sup>d</sup> [%] | Yield <sup>c</sup> [%] | ee <sup>e</sup> [%] |
| 1     | 0.5 equiv                      | 0.5 equiv                  | 35                     | 34                     | 97                  | 63                     | 41                  |
| 2     | 1.0 equiv                      | 0.5 equiv                  | 40                     | 39                     | 93                  | 58                     | 73                  |
| 3     | 3.0 equiv                      | 0.5 equiv                  | 43                     | 40                     | 94                  | 55                     | 53                  |
| 4     | 1.0 equiv                      | 0.25 equiv                 | 40                     | 35                     | 93                  | 56                     | 70                  |
| 5     | 3.0 equiv                      | 1.5 equiv                  | 20                     | 38                     | 96                  | 68                     | 16                  |

<sup>a</sup> Reaction conditions: 1.0 mL CH<sub>3</sub>CN, 0.1 mmol **3a**, 153 mol% Pd complex, 15 mol% AgOTf, RT, 24 h. <sup>b</sup> Determined by crude <sup>1</sup>H NMR spectra. <sup>c</sup> Isolated yields. <sup>d</sup> The enantioselectivity of (*E*)-**5aa** was determined by chiral HPLC analysis. <sup>e</sup> Determined by chiral HPLC analysis.

### General procedure for the Pd(II)-catalyzed asymmetric allylic alkylation of **4** with **3**.

(*aS,S*)-**2a** (15 mol%, 11.5 mg, 0.015 mmol) and AgOTf (15 mol%, 3.9 mg, 0.015 mmol) were stirred in CH<sub>3</sub>CN (1.0 mL) for 10 minutes. Then, racemic allylic alcohol **3** (0.1 mmol), arylboronic acid **4** (0.2 mmol), and triethylamine (0.05 mmol) were added and the reaction mixture was stirred at room temperature for 24 h. The solvent was evaporated under reduced pressure and the residue was purified by chromatography on silica gel to obtain the allylic alkylation product **5** and recovered alcohol **3**. The enantioselectivities of compound (*E*)-**5** and recovered alcohol **3** were determined by HPLC on a chiral stationary phase.

(*R,E*)-2-Benzylidene-3-phenylcyclohexanone **5aa**<sup>[2]</sup> (Table 1, entry 5): [ $\alpha$ ]<sub>D</sub><sup>20</sup> +149.4 (*c* 0.38, CHCl<sub>3</sub>) for 98 % ee. <sup>1</sup>H NMR (400 MHz, CDCl<sub>3</sub>, TMS):  $\delta$  1.69-1.76 (m, 2H), 2.08-2.13 (m, 2H), 2.41-2.50 (m, 1H), 2.65-2.67 (m, 1H), 4.51 (t, *J* = 3.6 Hz, 1H), 7.16-7.28 (m, 8H), 7.33-7.36 (m, 2H), 7.59 (s, 1H). Chiralcel OJ, hexane/*i*-PrOH = 97/3, 0.8 mL/min, 230 nm, *t*<sub>major</sub> = 12.74 min, *t*<sub>minor</sub> = 20.11 min.



**Table S2** Screening of chiral Pd-complexes.<sup>a</sup>

| 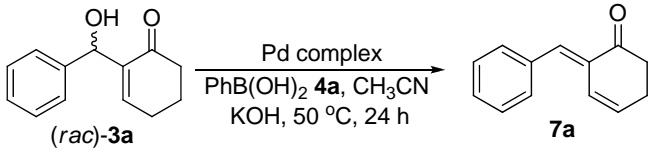 |                                          |                                    |
|-----------------------------------------------------------------------------------|------------------------------------------|------------------------------------|
| Entry                                                                             | Pd complex                               | <b>7a</b> , Yield <sup>b</sup> [%] |
| 1 <sup>c</sup>                                                                    | (aS,S)- <b>6a</b> , AgOTf                | 11                                 |
| 2 <sup>c</sup>                                                                    | (aS,S)- <b>6b</b> , AgOTf                | 55                                 |
| 3                                                                                 | (aS,S)- <b>6c</b> , Pd(OTf) <sub>2</sub> | 13                                 |
| 4 <sup>d</sup>                                                                    | Trost ligand, Pd(OTf) <sub>2</sub>       | trace                              |

<sup>a</sup> Reaction conditions: 1.0 mL CH<sub>3</sub>CN, 0.1 mmol **3a**, 0.2 mmol **4a**, 3 mol% Pd complex, 0.05 mmol KOH, 50 °C, 24 h. <sup>b</sup> Isolated yields. <sup>c</sup> 3 mol% AgOTf. <sup>d</sup> 15 mol% Pd complex, 15 mol% AgOTf.

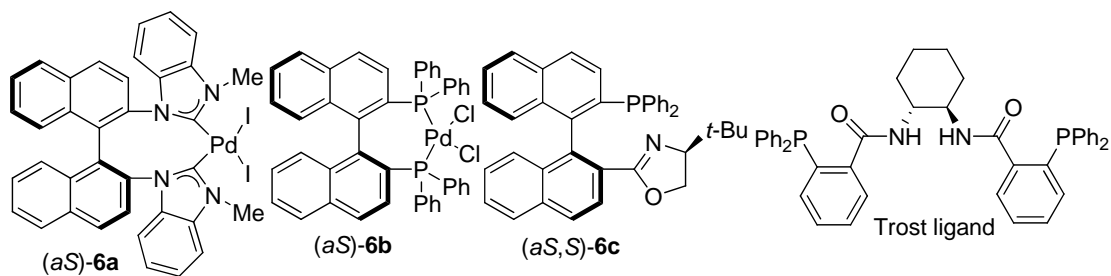

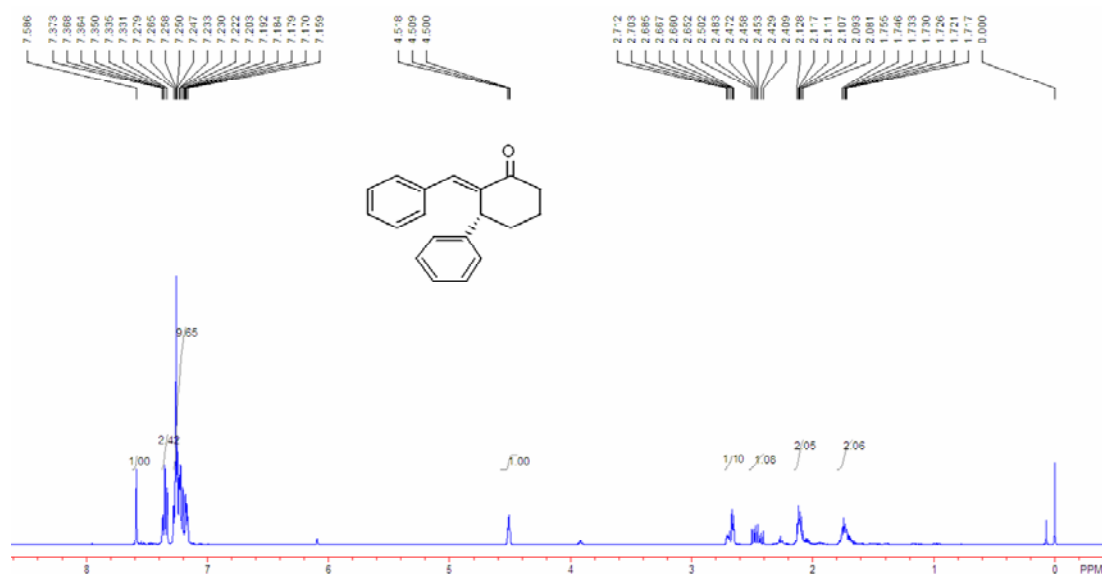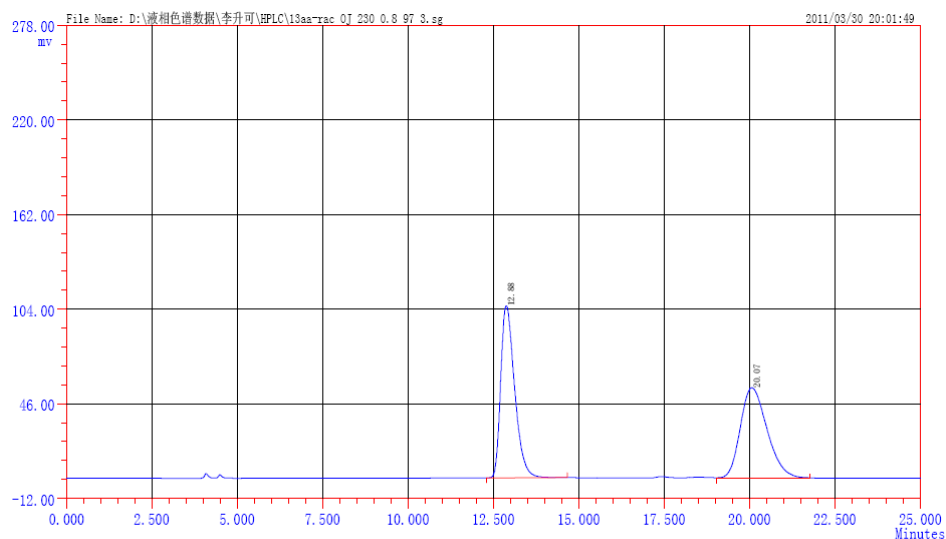

| ID | 组分名 | 保留时间   | 峰高     | 峰面积       | 浓度       | 拖尾因子 | 理论塔板 |
|----|-----|--------|--------|-----------|----------|------|------|
| 1  |     | 12.878 | 105544 | 2999090.6 | 49.6643  | 1.45 | 4094 |
| 2  |     | 20.073 | 55519  | 3039628.7 | 50.3357  | 1.27 | 2679 |
|    | Σ:  |        | 161063 | 6038719.4 | 100.0000 |      |      |

| Sample | RetTime<br>(min) | Hight | Area | Area (%) | Tailing<br>factor | Theoretical<br>plates (N) |
|--------|------------------|-------|------|----------|-------------------|---------------------------|
|--------|------------------|-------|------|----------|-------------------|---------------------------|

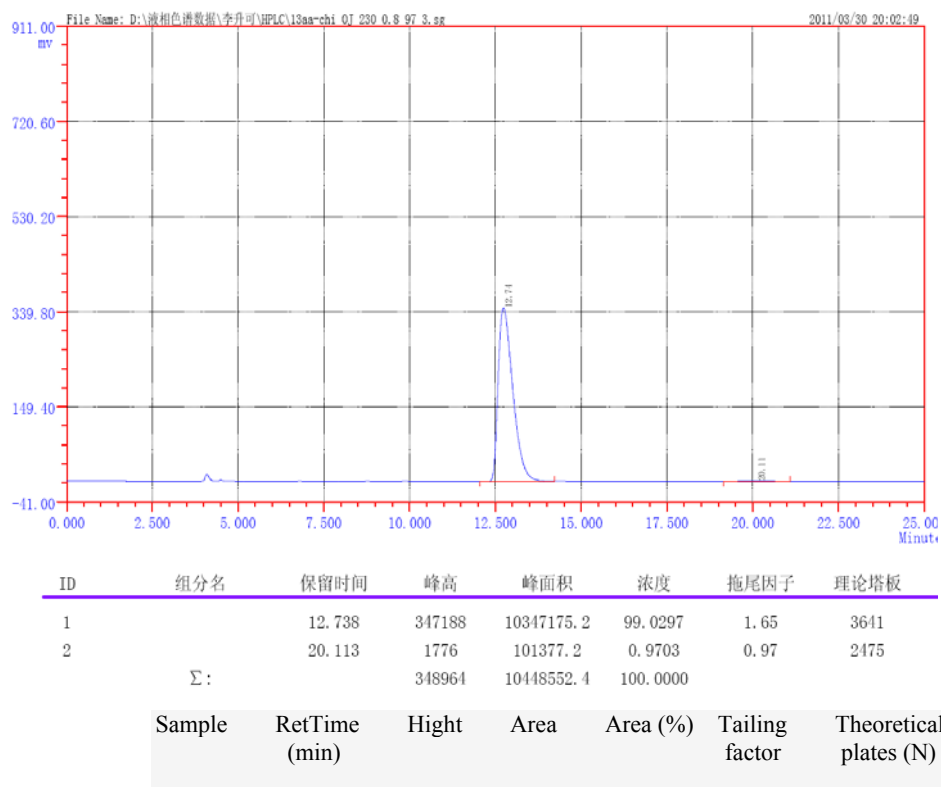

(*S*)-2-(hydroxy(phenyl)methyl)cyclohex-2-enone **3a**.<sup>[3]</sup>  $[\alpha]_D^{20} +9.3$  (*c* 0.80, CH<sub>2</sub>Cl<sub>2</sub>) for 61 % ee (Fig. 2, entry 8). <sup>1</sup>H NMR (400 MHz, CDCl<sub>3</sub>, TMS): δ 1.97-2.05 (m, 2H), 2.37-2.41 (m, 2H), 2.44-2.47 (m, 2H), 3.47 (br s, 1H), 5.56 (s, 1H), 6.73 (t, *J* = 4.4 Hz, 1H), 7.25-7.37 (m, 5H). Chiralcel OJ, hexane/*i*-PrOH = 90/10, 1.0 mL/min, 254 nm,  $t_{major} = 19.72$  min,  $t_{minor} = 17.86$  min.

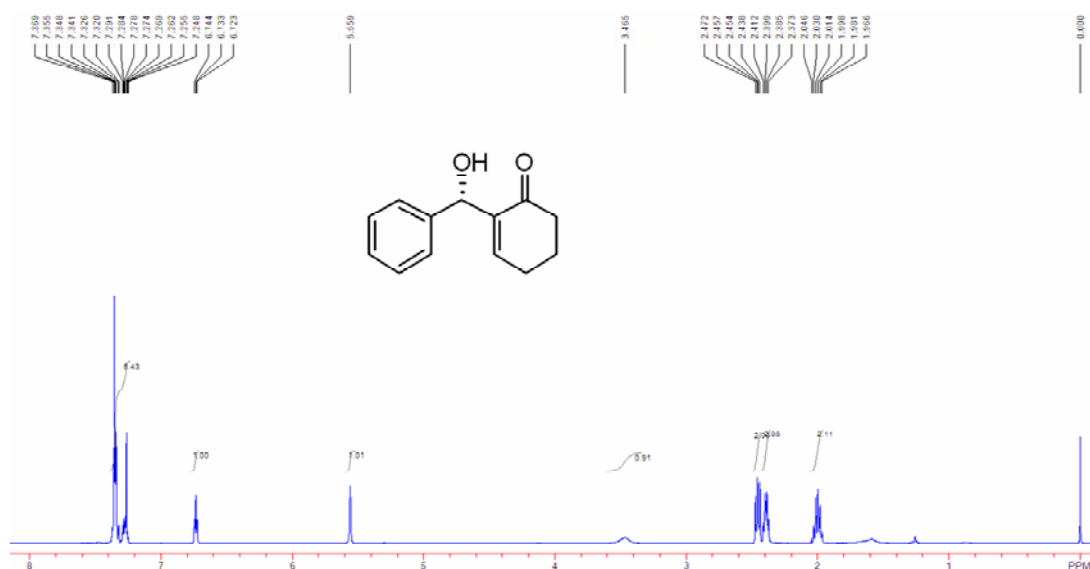

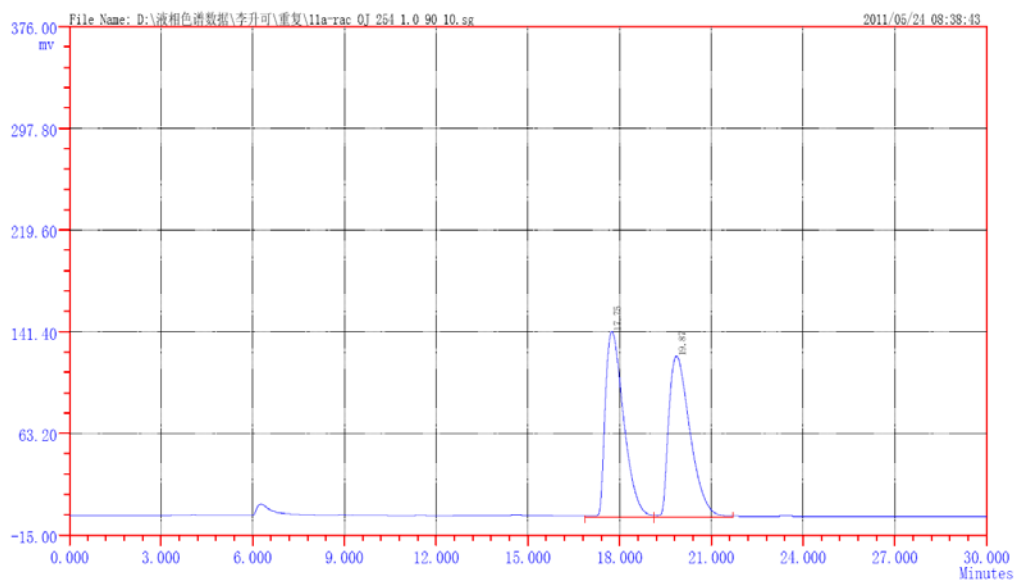

| ID | 组分名 | 保留时间   | 峰高     | 峰面积        | 浓度       | 拖尾因子 | 理论塔板 |
|----|-----|--------|--------|------------|----------|------|------|
| 1  |     | 17.750 | 142905 | 5985020.4  | 49.8226  | 1.75 | 3580 |
| 2  |     | 19.870 | 123993 | 6027629.6  | 50.1774  | 1.71 | 3330 |
| Σ: |     |        | 266898 | 12012650.0 | 100.0000 |      |      |

| Sample | RetTime (min) | Hight | Area | Area (%) | Tailing factor | Theoretical plates (N) |
|--------|---------------|-------|------|----------|----------------|------------------------|
|--------|---------------|-------|------|----------|----------------|------------------------|

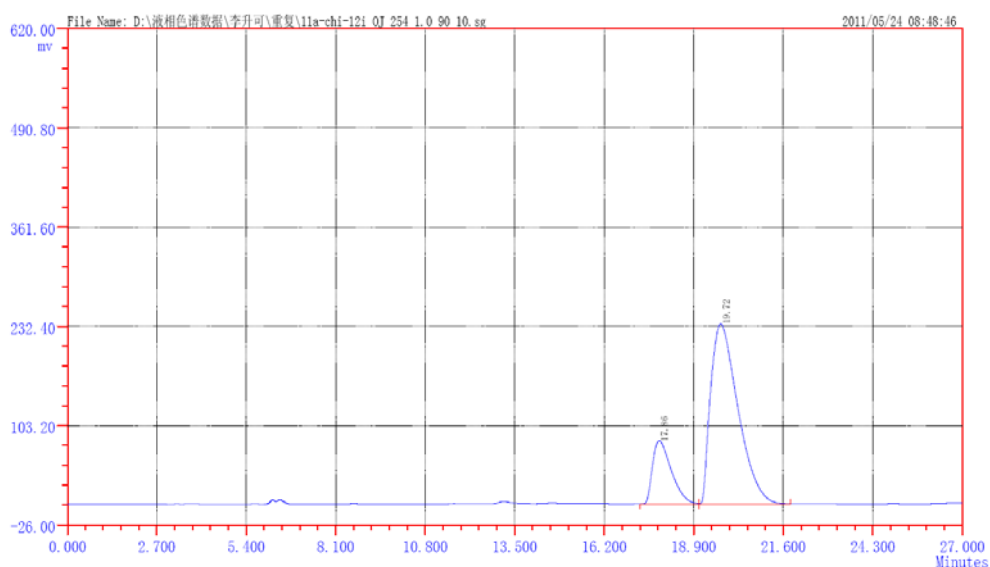

| ID | 组分名 | 保留时间   | 峰高     | 峰面积        | 浓度       | 拖尾因子 | 理论塔板 |
|----|-----|--------|--------|------------|----------|------|------|
| 1  |     | 17.858 | 82396  | 3270826.8  | 19.5487  | 1.72 | 4034 |
| 2  |     | 19.722 | 234695 | 13460860.2 | 80.4513  | 1.73 | 2357 |
| Σ: |     |        | 317091 | 16731687.0 | 100.0000 |      |      |

| Sample | RetTime (min) | Hight | Area | Area (%) | Tailing factor | Theoretical plates (N) |
|--------|---------------|-------|------|----------|----------------|------------------------|
|--------|---------------|-------|------|----------|----------------|------------------------|

(*E*)-2-benzylidenecyclohex-3-enone **7a** (Table 1, entries 6-8):<sup>[4]</sup> <sup>1</sup>H NMR (400 MHz, CDCl<sub>3</sub>, TMS): δ 2.57-2.62 (m, 2H), 2.66-2.70 (m, 2H), 6.13-6.18 (m, 1H), 6.93 (dd, *J* = 0.8, 10.0 Hz, 1H), 7.31-7.34 (m, 1H), 7.37-7.41 (m, 2H), 7.42-7.44 (m, 3H).

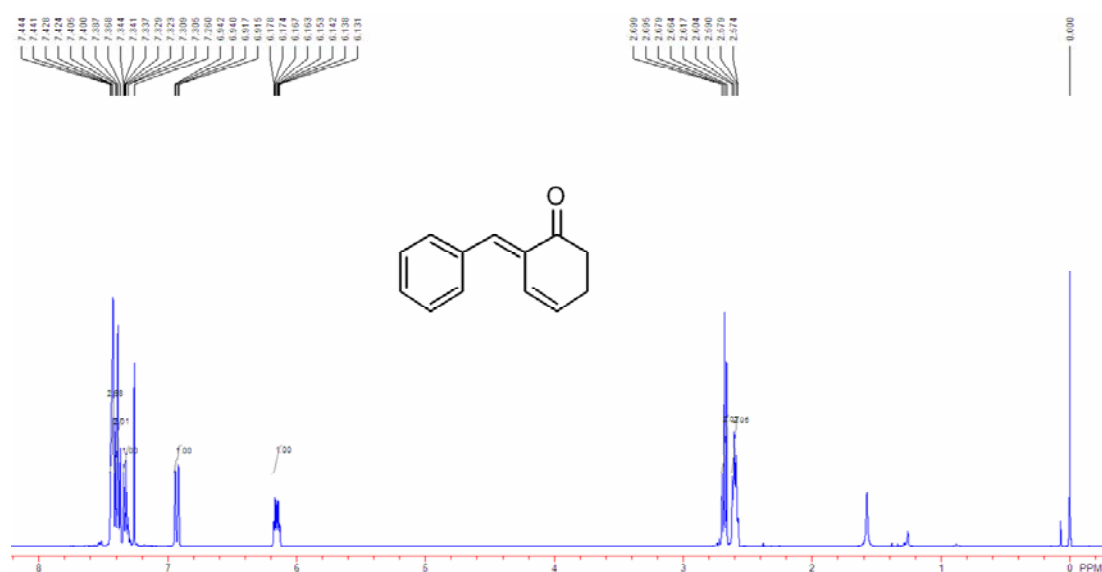

(*R,E*)-2-benzylidene-3-*o*-tolylcyclohexanone **5ab** (Fig. 2, entry 1):  $[\alpha]_{\text{D}}^{20} +16.8$  ( $c$  0.25,  $\text{CHCl}_3$ ) for 93 % ee.  $^1\text{H}$  NMR (400 MHz,  $\text{CDCl}_3$ , TMS):  $\delta$  1.73-2.02 (m, 4H), 2.38 (s, 3H), 2.44-2.54 (m, 1H), 2.74-2.79 (m, 1H), 4.56 (br s, 1H), 6.94 (d,  $J = 7.6$  Hz, 1H), 7.07-7.25 (m, 8H), 7.57 (s, 1H);  $^{13}\text{C}$  NMR (100 MHz,  $\text{CDCl}_3$ , TMS):  $\delta$  18.9, 22.7, 31.9, 40.6, 44.4, 126.1, 126.5, 128.3, 128.56, 128.59, 129.8, 131.2, 134.7, 135.2, 136.9, 139.9, 142.8, 203.1. Chiralcel AD, hexane/*i*-PrOH = 90/10, 0.8 mL/min, 254 nm,  $t_{\text{major}} = 12.95$  min,  $t_{\text{minor}} = 7.29$  min.

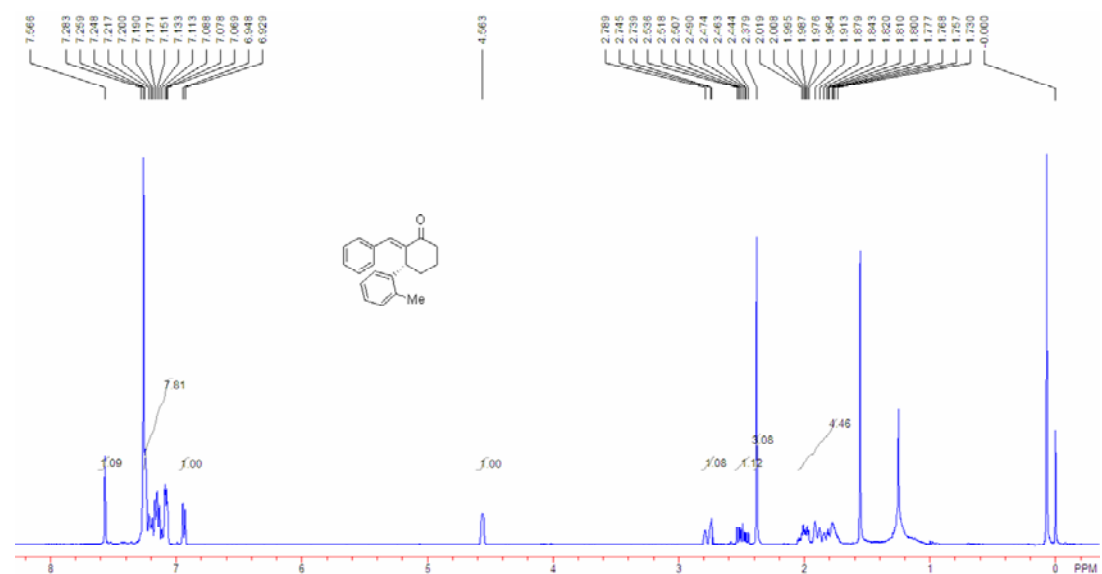

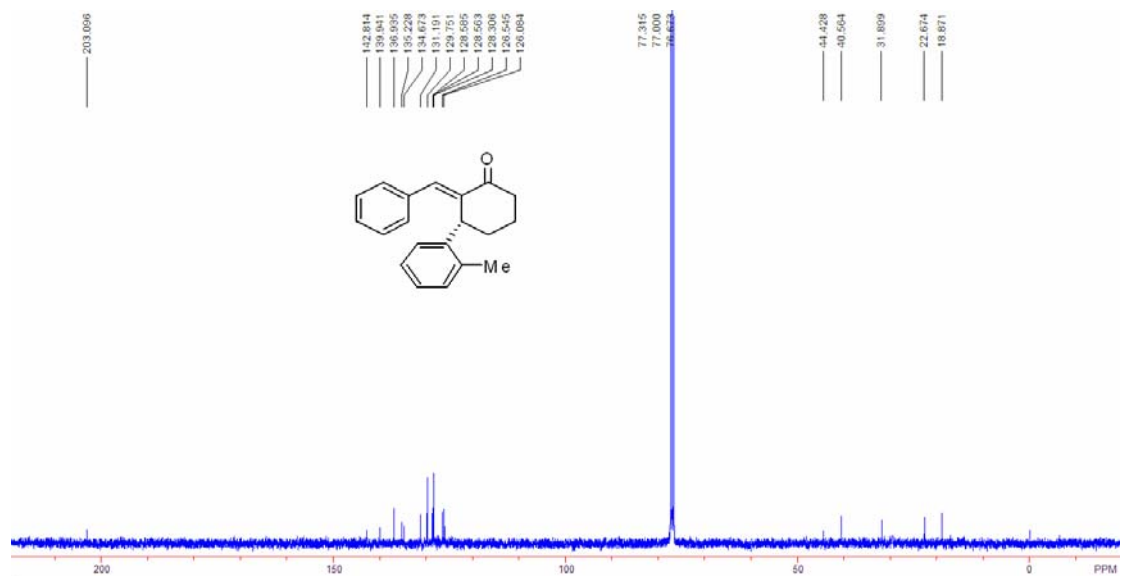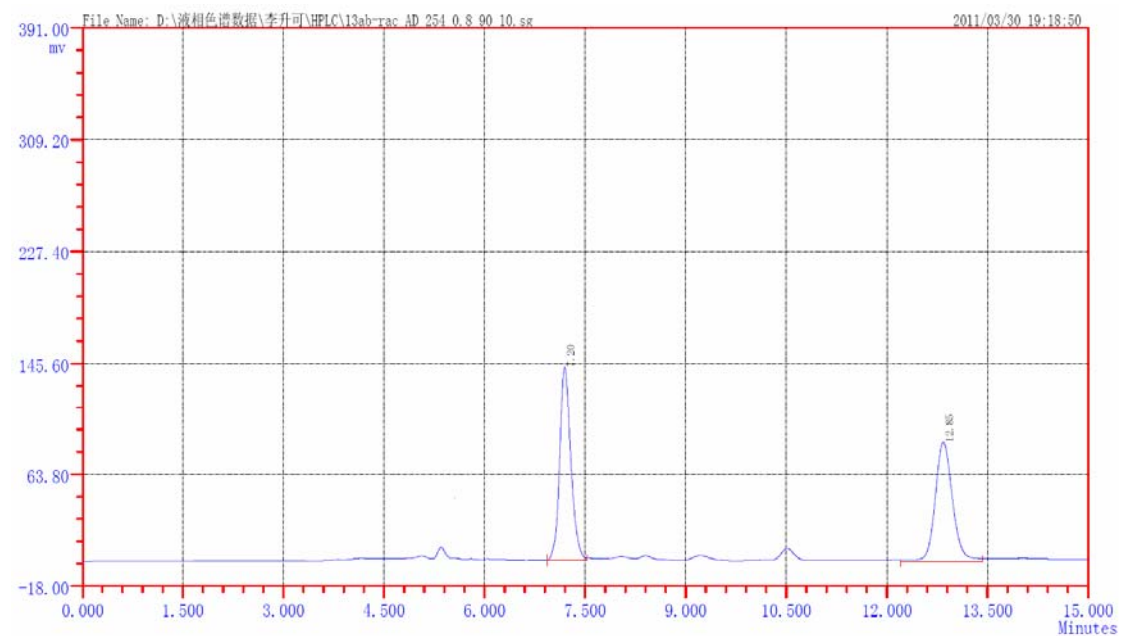

| ID     | 组分名 | 保留时间          | 峰高     | 峰面积       | 浓度       | 拖尾因子           | 理论塔板                   |
|--------|-----|---------------|--------|-----------|----------|----------------|------------------------|
| 1      |     | 7.195         | 142131 | 1616025.2 | 50.5612  | 1.27           | 7981                   |
| 2      |     | 12.847        | 87322  | 1580154.1 | 49.4388  | 1.14           | 10045                  |
| Σ:     |     |               | 229453 | 3196179.3 | 100.0000 |                |                        |
| Sample |     | RetTime (min) | Hight  | Area      | Area (%) | Tailing factor | Theoretical plates (N) |

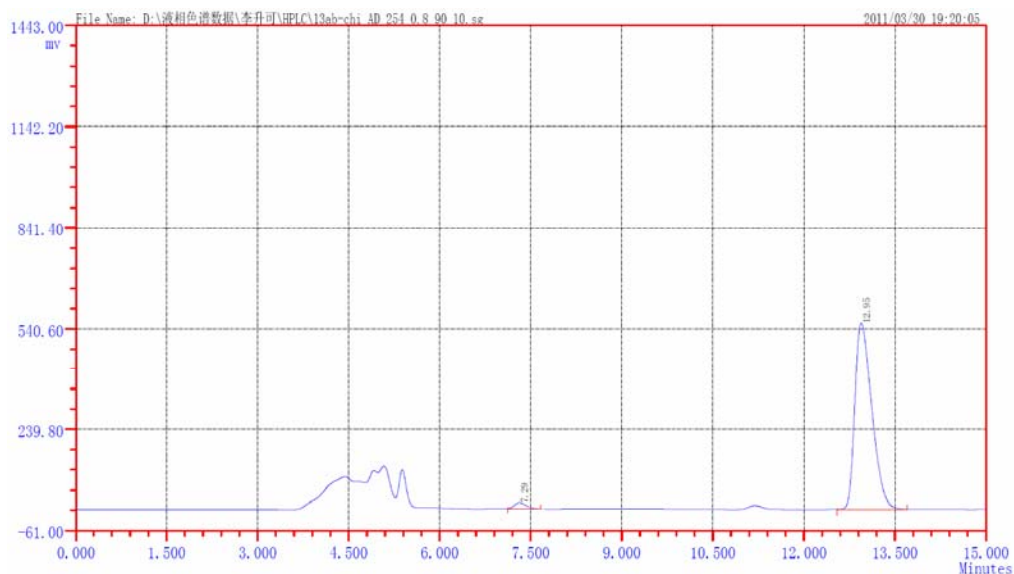

| ID | 组分名    | 保留时间          | 峰高     | 峰面积        | 浓度       | 拖尾因子           | 理论塔板                   |
|----|--------|---------------|--------|------------|----------|----------------|------------------------|
| 1  |        | 7.287         | 26760  | 387510.5   | 3.4405   | 2.59           | 5046                   |
| 2  |        | 12.948        | 557486 | 10875659.0 | 96.5595  | 1.48           | 8780                   |
| Σ: |        |               | 584246 | 11263169.5 | 100.0000 |                |                        |
|    | Sample | RetTime (min) | Hight  | Area       | Area (%) | Tailing factor | Theoretical plates (N) |

(*R,E*)-2-Benzylidene-3-*m*-tolylcyclohexanone **5ac** (Fig. 2, entry 2):  $[\alpha]_D^{20} +152.4$  ( $c$  0.50,  $\text{CHCl}_3$ ) for 95 % ee.  $^1\text{H}$  NMR (400 MHz,  $\text{CDCl}_3$ , TMS):  $\delta$  1.70-1.76 (m, 2H), 2.04-2.12 (m, 2H), 2.35 (s, 3H), 2.40-2.49 (m, 1H), 2.65-2.71 (m, 1H), 4.47 (t,  $J = 3.6$  Hz, 1H), 7.00-7.02 (m, 2H), 7.06 (d,  $J = 7.2$  Hz, 1H), 7.17-7.20 (m, 2H), 7.21-7.23 (m, 1H), 7.25-7.28 (m, 3H), 7.57 (s, 1H);  $^{13}\text{C}$  NMR (100 MHz,  $\text{CDCl}_3$ , TMS):  $\delta$  18.8, 21.6, 32.2, 40.5, 43.2, 124.9, 127.3, 128.3, 128.4, 128.67, 128.71, 130.1, 135.1, 136.9, 138.4, 139.3, 144.0, 203.2. MS (ESI)  $m/z$  (%): 277.2 ( $\text{M}+\text{H}$ , 17.8); HRMS (Micromass LCT) Calcd. for  $\text{C}_{20}\text{H}_{21}\text{O}$ : 277.1592; Found: 277.1597. Chiralcel AD, hexane/*i*-PrOH = 90/10, 0.5 mL/min, 254 nm,  $t_{\text{major}} = 11.96$  min,  $t_{\text{minor}} = 10.61$  min.

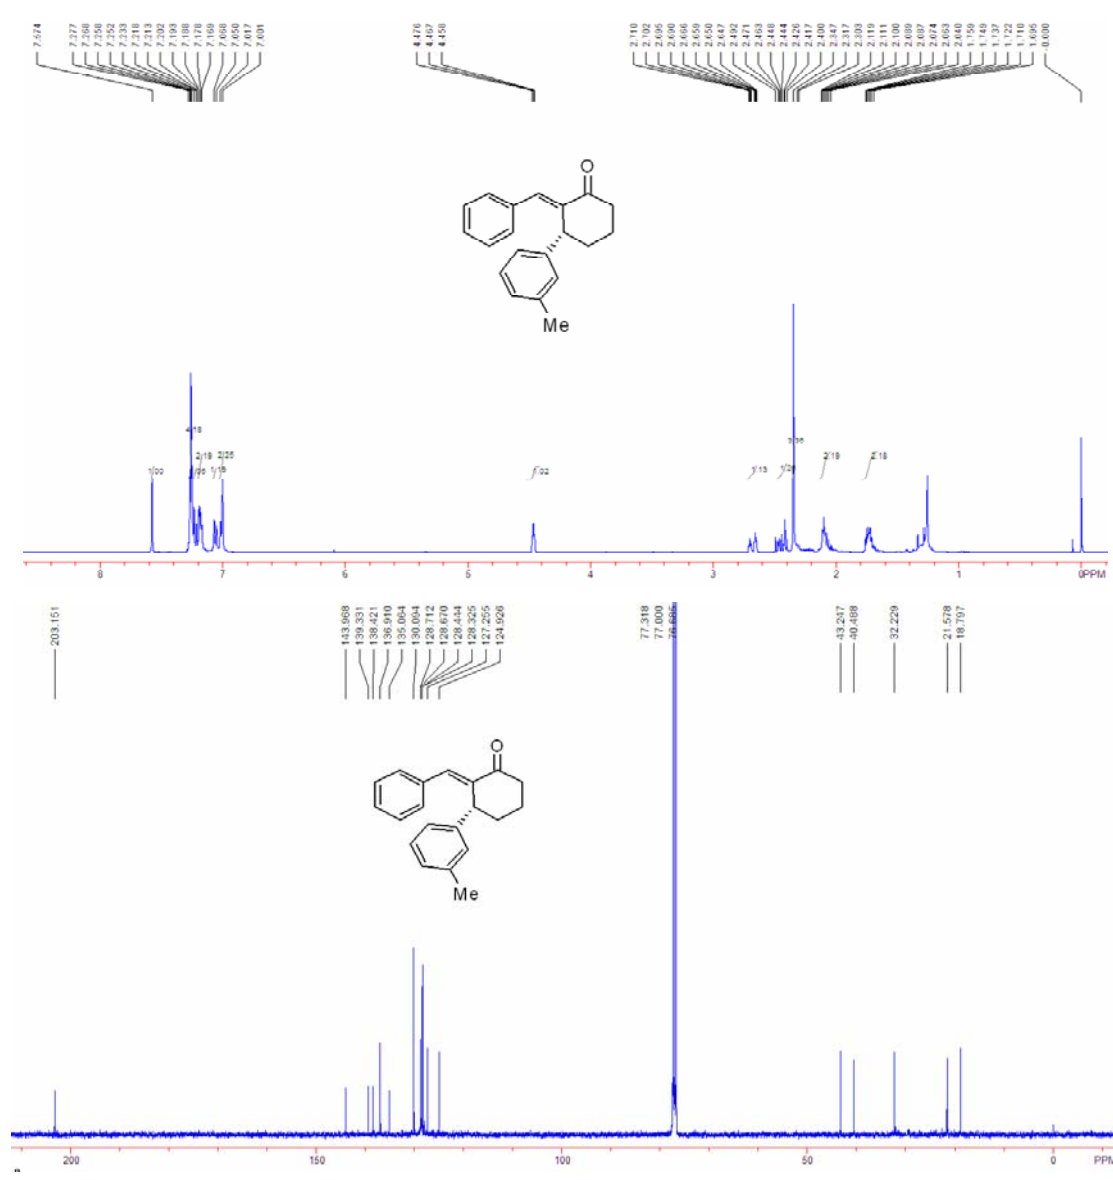



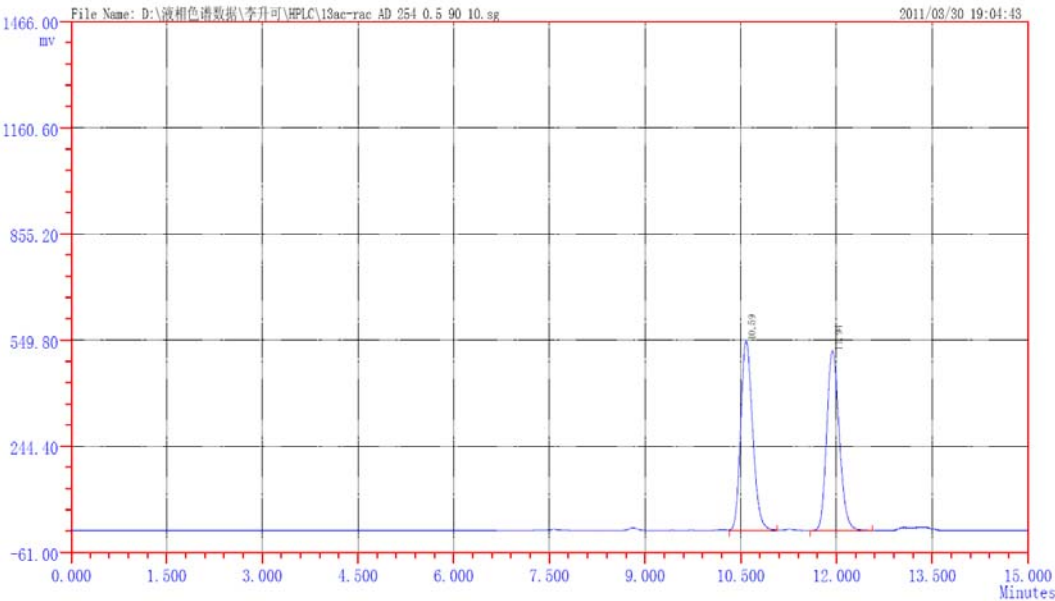

| ID     | 组分名 | 保留时间          | 峰高      | 峰面积        | 浓度       | 拖尾因子           | 理论塔板                   |
|--------|-----|---------------|---------|------------|----------|----------------|------------------------|
| 1      |     | 10.587        | 546405  | 7161455.0  | 50.0953  | 1.20           | 13004                  |
| 2      |     | 11.940        | 517680  | 7134200.3  | 49.9047  | 1.18           | 14961                  |
| Σ:     |     |               | 1064085 | 14295655.3 | 100.0000 |                |                        |
| Sample |     | RetTime (min) | Hight   | Area       | Area (%) | Tailing factor | Theoretical plates (N) |

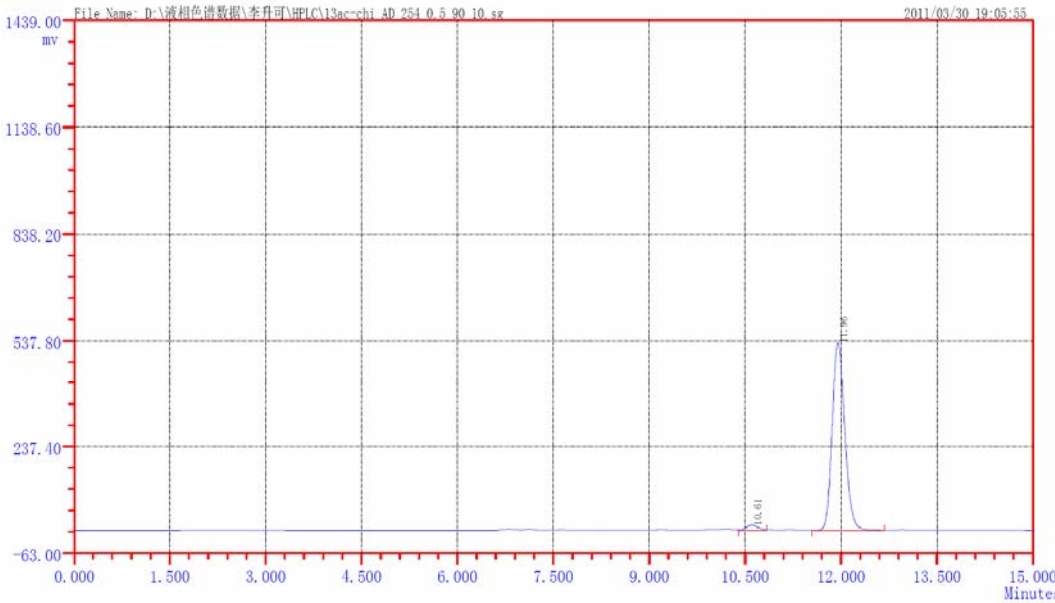

| ID     | 组分名 | 保留时间          | 峰高     | 峰面积       | 浓度       | 拖尾因子           | 理论塔板                   |
|--------|-----|---------------|--------|-----------|----------|----------------|------------------------|
| 1      |     | 10.607        | 14573  | 180755.0  | 2.4097   | 1.13           | 14575                  |
| 2      |     | 11.955        | 530777 | 7320247.3 | 97.5903  | 1.17           | 14976                  |
| Σ:     |     |               | 545350 | 7501002.3 | 100.0000 |                |                        |
| Sample |     | RetTime (min) | Hight  | Area      | Area (%) | Tailing factor | Theoretical plates (N) |

(*R,E*)-2-Benzylidene-3-*p*-tolylcyclohexanone **5ad**<sup>[2]</sup> (Fig. 2, entry 3):  $[\alpha]_D^{20} +67.1$  (*c* 0.35, CHCl<sub>3</sub>) for 95 % ee. <sup>1</sup>H NMR (400 MHz, CDCl<sub>3</sub>, TMS):  $\delta$  1.69-1.76 (m, 2H), 2.06-2.10 (m, 2H), 2.35 (s, 3H), 2.40-2.49 (m, 1H), 2.64-2.69 (m, 1H), 4.47 (t, *J* = 3.6 Hz, 1H), 7.10 (d, *J* = 8.0 Hz, 2H), 7.14-7.20 (m, 4H), 7.25-7.27 (m, 3H), 7.56 (s, 1H). <sup>13</sup>C NMR (100 MHz, CDCl<sub>3</sub>, TMS):  $\delta$  18.8, 21.0, 32.2, 40.5, 42.9, 127.7, 128.3, 128.7, 129.5, 130.1, 135.1, 136.0, 136.8, 139.5, 140.9, 203.2. MS (ESI) *m/z* (%): 277.2 (M+H, 100); HRMS (Micromass LCT) Calcd. for C<sub>20</sub>H<sub>21</sub>O: 277.1592; Found: 277.1588. Chiralcel OD, hexane/*i*-PrOH = 90/10, 0.7 mL/min, 254 nm, *t*<sub>major</sub> = 12.15 min, *t*<sub>minor</sub> = 7.04 min.

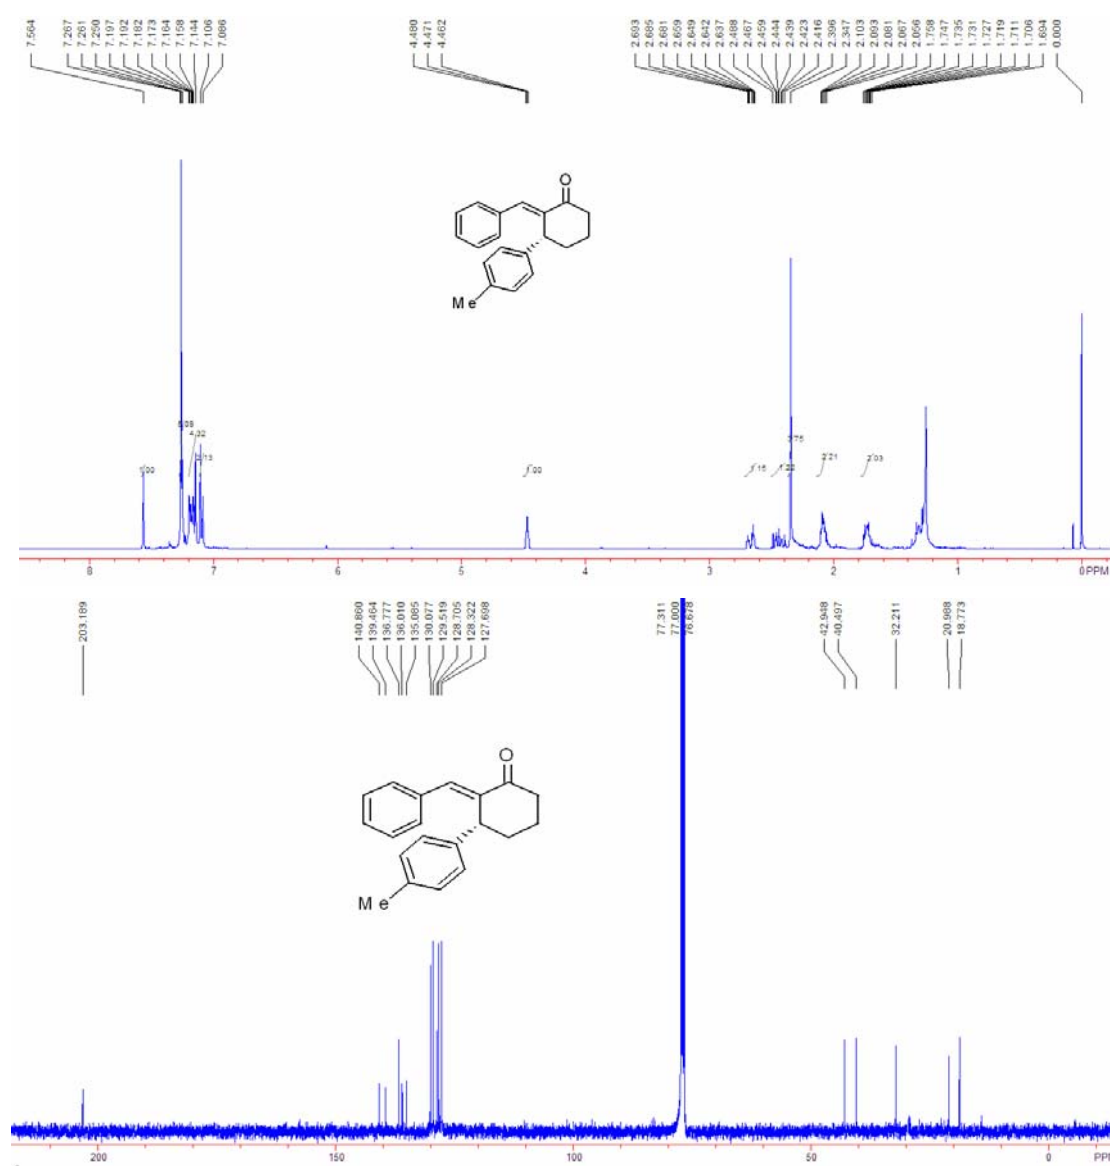

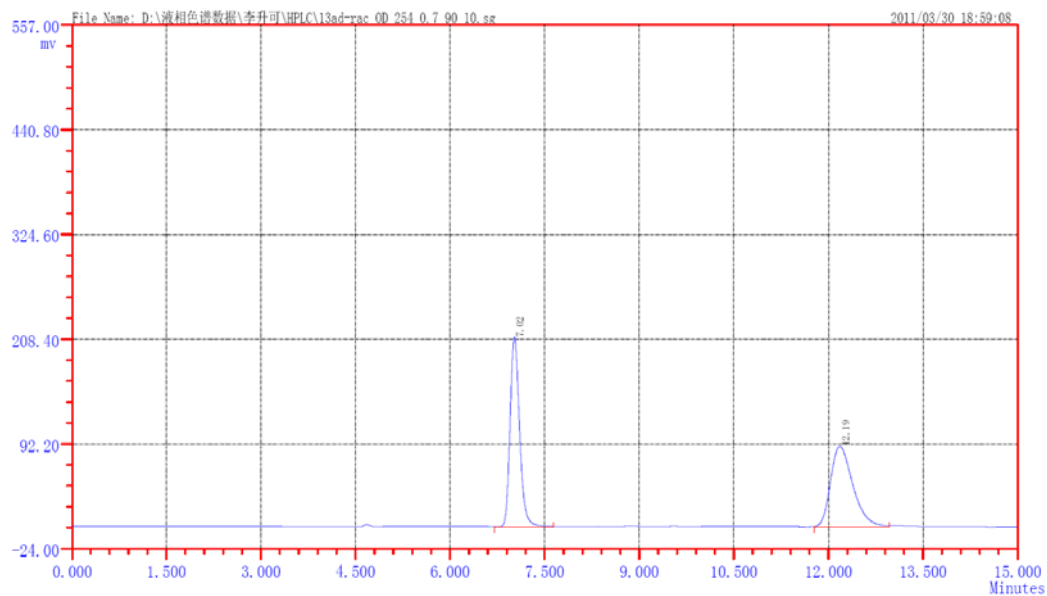

| ID     | 组分名 | 保留时间          | 峰高     | 峰面积       | 浓度       | 拖尾因子           | 理论塔板                   |
|--------|-----|---------------|--------|-----------|----------|----------------|------------------------|
| 1      |     | 7.020         | 210789 | 2231957.4 | 50.0003  | 1.23           | 8760                   |
| 2      |     | 12.187        | 89701  | 2231929.4 | 49.9997  | 1.37           | 4781                   |
| Σ:     |     |               | 300490 | 4463886.7 | 100.0000 |                |                        |
| Sample |     | RetTime (min) | Hight  | Area      | Area (%) | Tailing factor | Theoretical plates (N) |

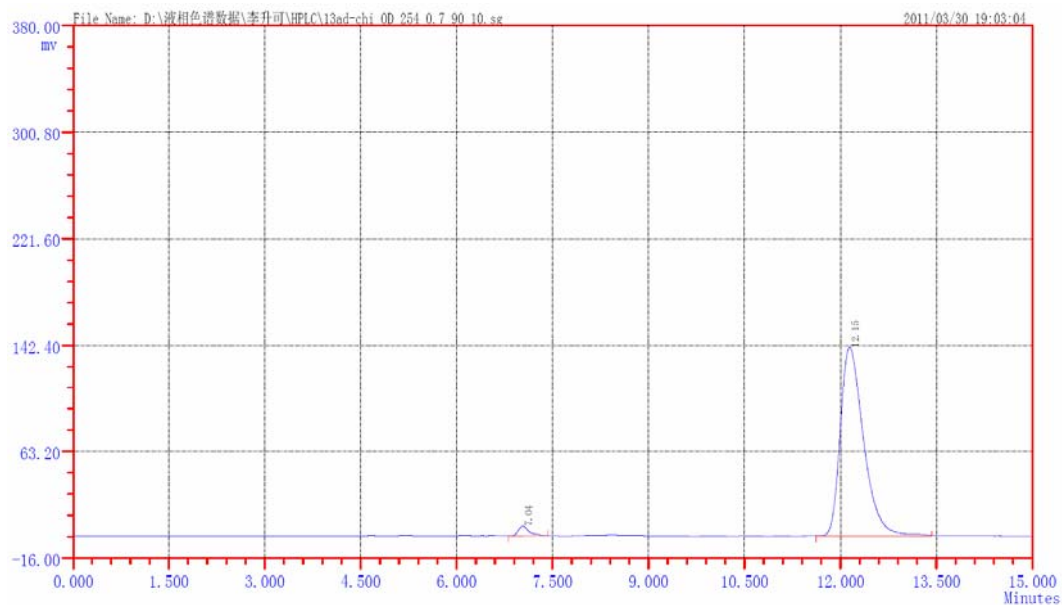

| ID     | 组分名 | 保留时间          | 峰高     | 峰面积       | 浓度       | 拖尾因子           | 理论塔板                   |
|--------|-----|---------------|--------|-----------|----------|----------------|------------------------|
| 1      |     | 7.035         | 7641   | 92004.1   | 2.5179   | 1.59           | 6804                   |
| 2      |     | 12.147        | 140689 | 3562002.1 | 97.4821  | 1.44           | 4587                   |
| Σ:     |     |               | 148330 | 3654006.2 | 100.0000 |                |                        |
| Sample |     | RetTime (min) | Hight  | Area      | Area (%) | Tailing factor | Theoretical plates (N) |

(*R,E*)-2-Benzylidene-3-(3-chlorophenyl)cyclohexanone **5ae**. (Fig. 2, entry 4):  $[\alpha]_D^{20} +47.1$  (*c* 0.39, CHCl<sub>3</sub>) for 97 % ee. <sup>1</sup>H NMR (400 MHz, CDCl<sub>3</sub>, TMS):  $\delta$  1.64-1.80 (m, 2H), 2.09-2.13 (m, 2H), 2.41-2.50 (m, 1H), 2.65-2.71 (m, 1H), 4.48 (br s, 1H), 7.09 (d, *J* = 7.2 Hz, 1H), 7.14-7.16 (m, 2H), 7.22-7.30 (m, 6H), 7.61 (s, 1H). <sup>13</sup>C NMR (100 MHz, CDCl<sub>3</sub>, TMS):  $\delta$  18.7, 32.1, 40.3, 43.1, 126.1, 126.9, 127.9, 128.5, 129.0, 130.0, 130.1, 134.80, 134.83, 137.7, 138.3, 146.2, 209.3. MS (ESI) *m/z* (%): 297.1 (M+H, 100); HRMS (Micromass LCT) Calcd. for C<sub>19</sub>H<sub>18</sub>ClO: 297.1046; Found: 297.1049. Chiralcel AD, hexane/*i*-PrOH = 90/10, 0.8 mL/min, 254 nm, *t*<sub>major</sub> = 8.74 min, *t*<sub>minor</sub> = 7.92 min.

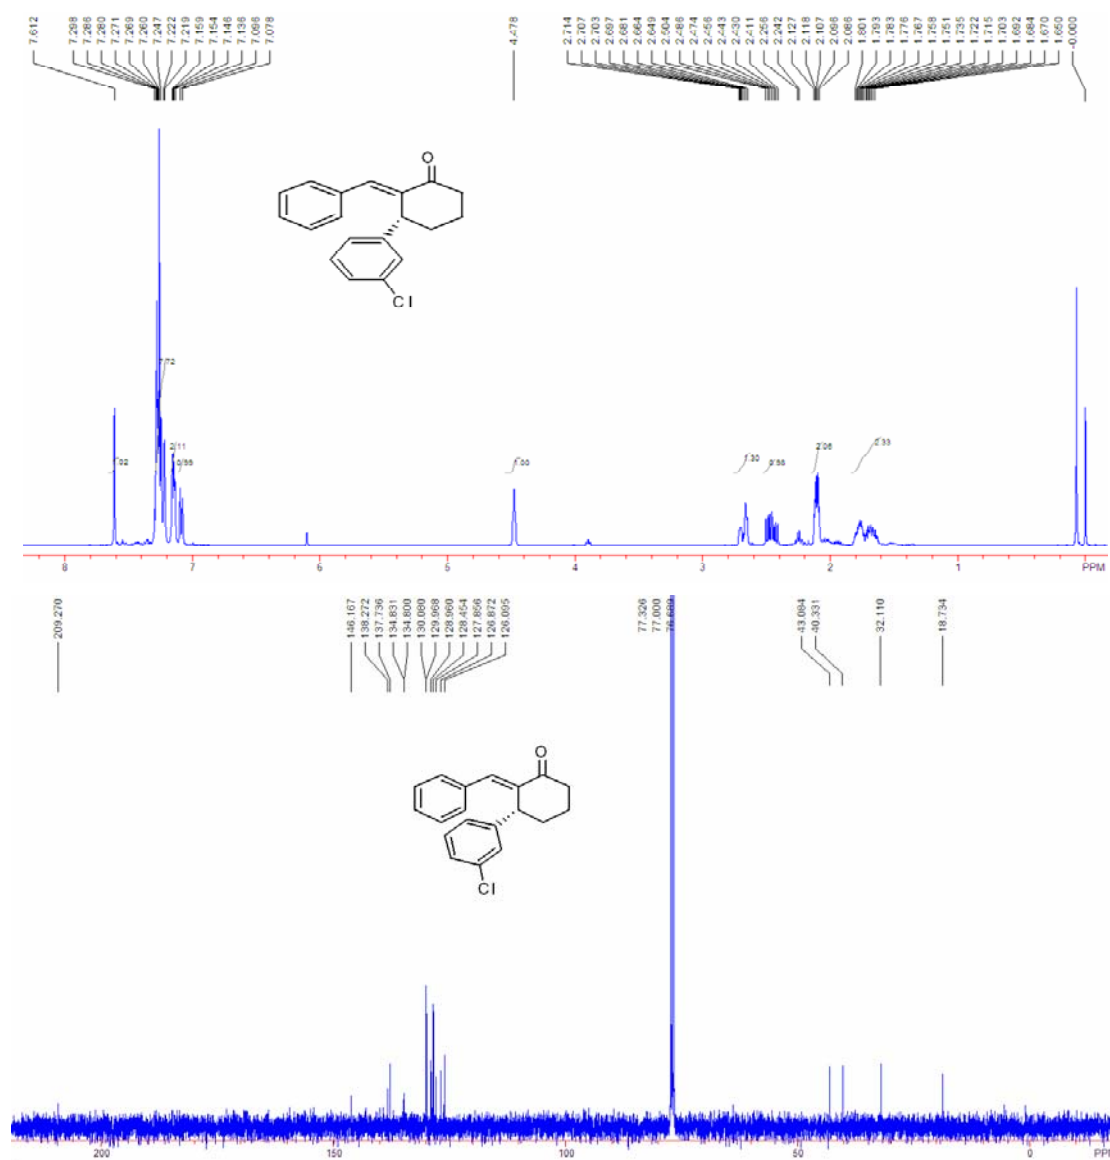

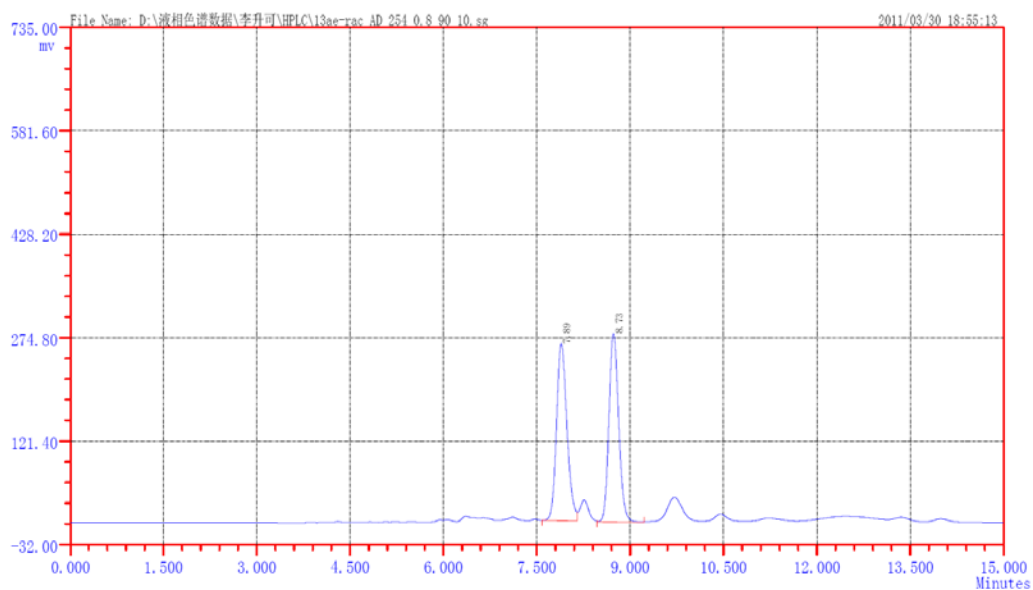

| ID     | 组分名 | 保留时间          | 峰高     | 峰面积       | 浓度       | 拖尾因子           | 理论塔板                   |
|--------|-----|---------------|--------|-----------|----------|----------------|------------------------|
| 1      |     | 7.893         | 263082 | 3058241.8 | 50.1847  | 1.23           | 9189                   |
| 2      |     | 8.732         | 279663 | 3035733.5 | 49.8153  | 1.15           | 12896                  |
| Σ:     |     |               | 542745 | 6093975.3 | 100.0000 |                |                        |
| Sample |     | RetTime (min) | Hight  | Area      | Area (%) | Tailing factor | Theoretical plates (N) |

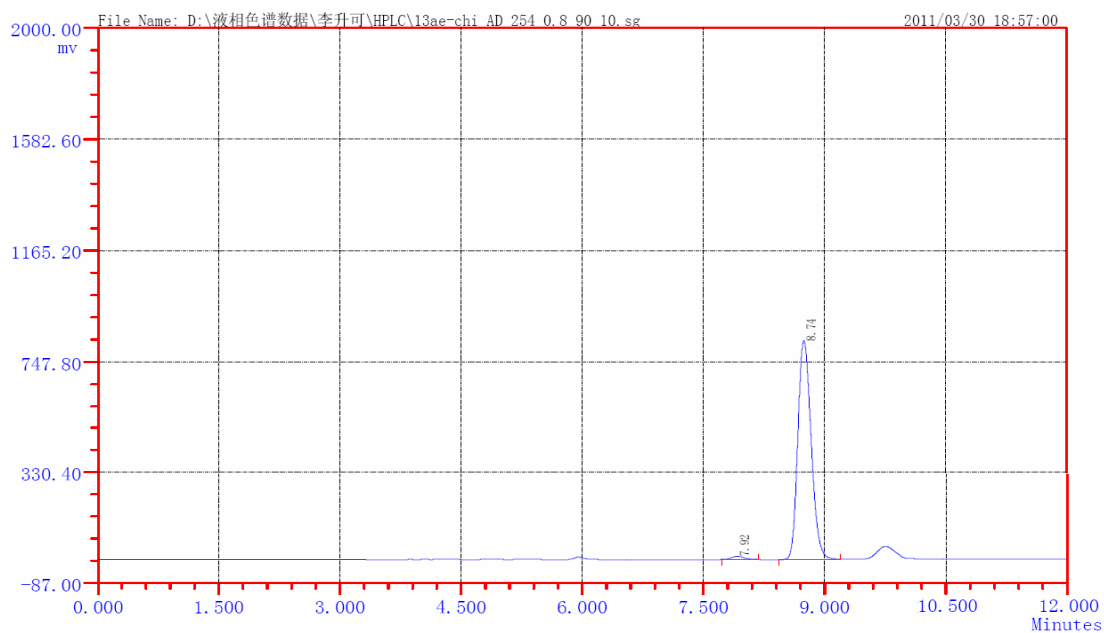

| ID     | 组分名 | 保留时间          | 峰高     | 峰面积       | 浓度       | 拖尾因子           | 理论塔板                   |
|--------|-----|---------------|--------|-----------|----------|----------------|------------------------|
| 1      |     | 7.918         | 11371  | 131407.3  | 1.3678   | 1.21           | 9357                   |
| 2      |     | 8.743         | 826046 | 9475694.6 | 98.6322  | 1.20           | 11579                  |
| Σ:     |     |               | 837417 | 9607101.8 | 100.0000 |                |                        |
| Sample |     | RetTime (min) | Hight  | Area      | Area (%) | Tailing factor | Theoretical plates (N) |

**<sup>1</sup>H NMR (400 MHz, CDCl<sub>3</sub>)**

Chemical structure: Clc1ccc(cc1)/C=C/C2=CC=CC=C2C3=CC(=O)CCCC3

Peak list (ppm): 7.569, 7.533, 7.529, 7.529, 7.517, 7.512, 7.505, 7.500, 7.273, 7.261, 7.256, 7.254, 7.234, 7.216, 7.168, 7.160, 7.154, 7.146, 7.139, 7.135, 4.472, 4.464, 2.702, 2.691, 2.684, 2.682, 2.666, 2.667, 2.647, 2.602, 2.484, 2.472, 2.259, 2.254, 2.241, 2.235, 2.203, 2.118, 2.107, 2.097, 2.090, 2.081, 2.071, 1.775, 1.758, 1.758, 1.751, 1.742, 1.711, 1.681, 1.668, 1.653, 0.000.

Integration values: 1.03, 2.49, 3.28, 4.22, 1.00, 1.24, 1.23, 1.37, 2.30.

**<sup>13</sup>C NMR (100 MHz, CDCl<sub>3</sub>)**

Chemical structure: Clc1ccc(cc1)/C=C/C2=CC=CC=C2C3=CC(=O)CCCC3

Peak list (ppm): 142.566, 137.566, 137.445, 134.799, 132.324, 132.324, 129.024, 129.024, 126.988, 126.923, 126.419, 77.312, 76.673, 62.787, 40.395, 32.134, 16.093.

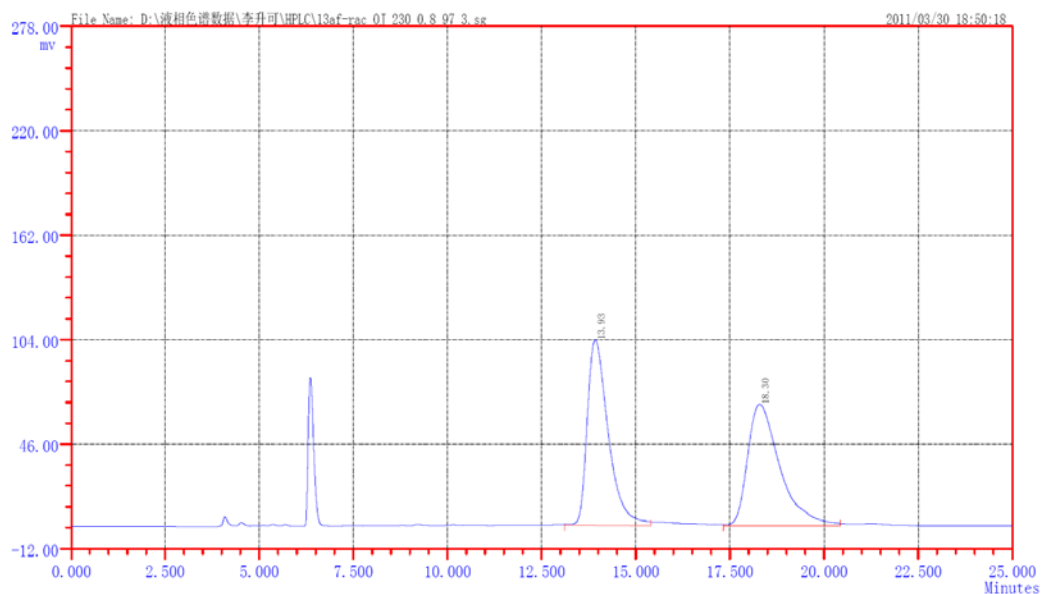

| ID | 组分名 | 保留时间   | 峰高     | 峰面积       | 浓度       | 拖尾因子 | 理论塔板 |
|----|-----|--------|--------|-----------|----------|------|------|
| 1  |     | 13.928 | 103035 | 4013871.6 | 50.0523  | 1.61 | 2548 |
| 2  |     | 18.302 | 67311  | 4005475.5 | 49.9477  | 1.68 | 1885 |
| Σ: |     |        | 170346 | 8019347.1 | 100.0000 |      |      |

| Sample | RetTime (min) | Hight | Area | Area (%) | Tailing factor | Theoretical plates (N) |
|--------|---------------|-------|------|----------|----------------|------------------------|
|--------|---------------|-------|------|----------|----------------|------------------------|

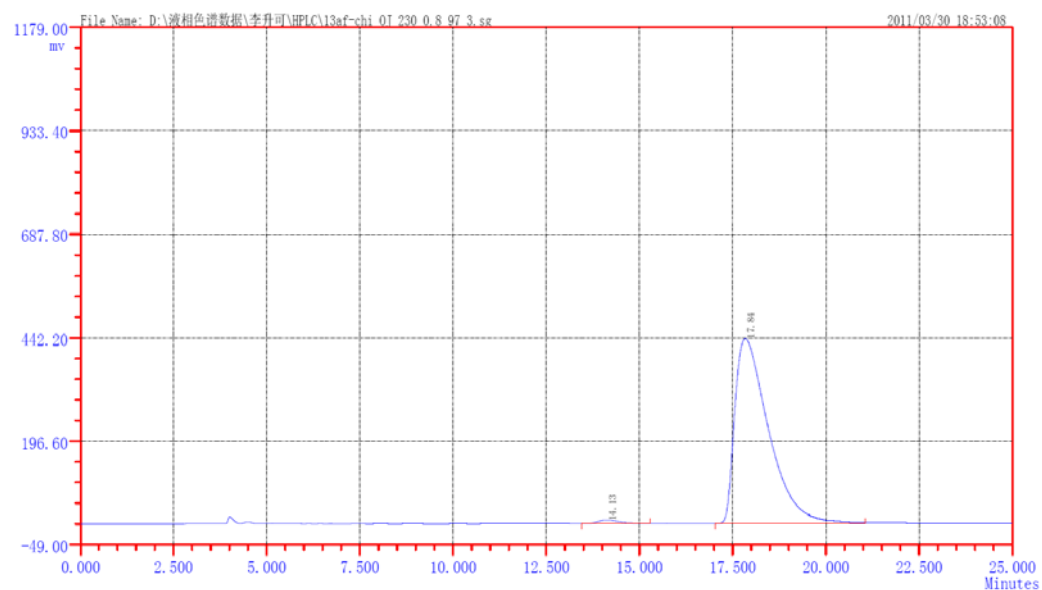

| ID | 组分名 | 保留时间   | 峰高     | 峰面积        | 浓度       | 拖尾因子 | 理论塔板 |
|----|-----|--------|--------|------------|----------|------|------|
| 1  |     | 14.132 | 8302   | 317994.2   | 1.1300   | 1.50 | 2713 |
| 2  |     | 17.842 | 439421 | 27823594.6 | 98.8700  | 2.12 | 1582 |
| Σ: |     |        | 447723 | 28141588.8 | 100.0000 |      |      |

| Sample | RetTime (min) | Hight | Area | Area (%) | Tailing factor | Theoretical plates (N) |
|--------|---------------|-------|------|----------|----------------|------------------------|
|--------|---------------|-------|------|----------|----------------|------------------------|

(*R,E*)-2-Benzylidene-3-(2-methoxyphenyl)cyclohexanone **5ag**. (Fig. 2, entry 6):  $[\alpha]_D^{20}$  +37.2 (*c* 0.52, CHCl<sub>3</sub>) for 94 % ee. <sup>1</sup>H NMR (400 MHz, CDCl<sub>3</sub>, TMS): δ 1.73-1.81





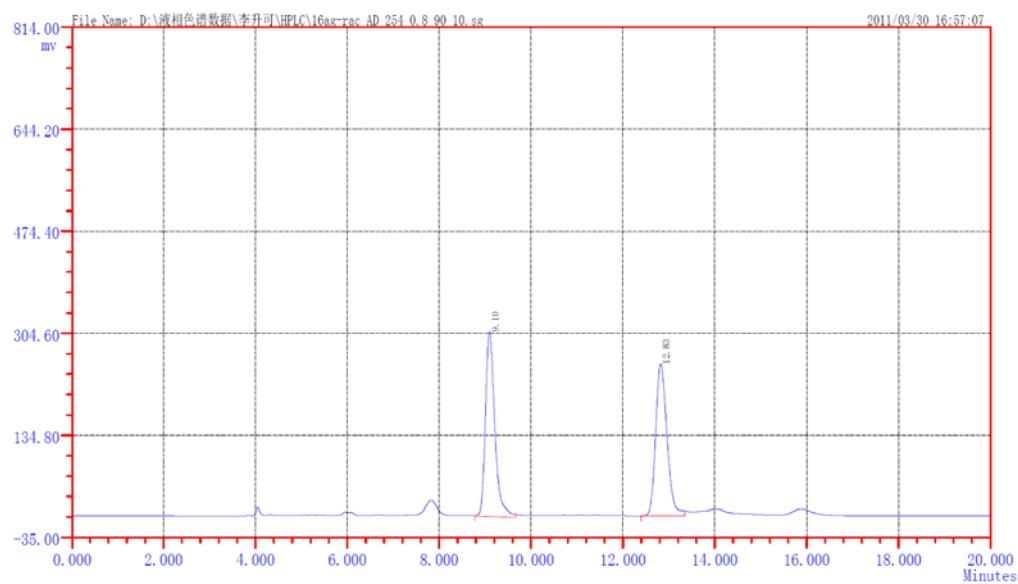

| ID | 组分名 | 保留时间   | 峰高     | 峰面积       | 浓度       | 拖尾因子 | 理论塔板  |
|----|-----|--------|--------|-----------|----------|------|-------|
| 1  |     | 9.097  | 306894 | 4362069.4 | 49.9876  | 1.37 | 8164  |
| 2  |     | 12.825 | 253365 | 4364233.0 | 50.0124  | 1.24 | 11049 |
| Σ: |     |        | 560259 | 8726302.4 | 100.0000 |      |       |

| Sample | RetTime (min) | Hight | Area | Area (%) | Tailing factor | Theoretical plates (N) |
|--------|---------------|-------|------|----------|----------------|------------------------|
|--------|---------------|-------|------|----------|----------------|------------------------|

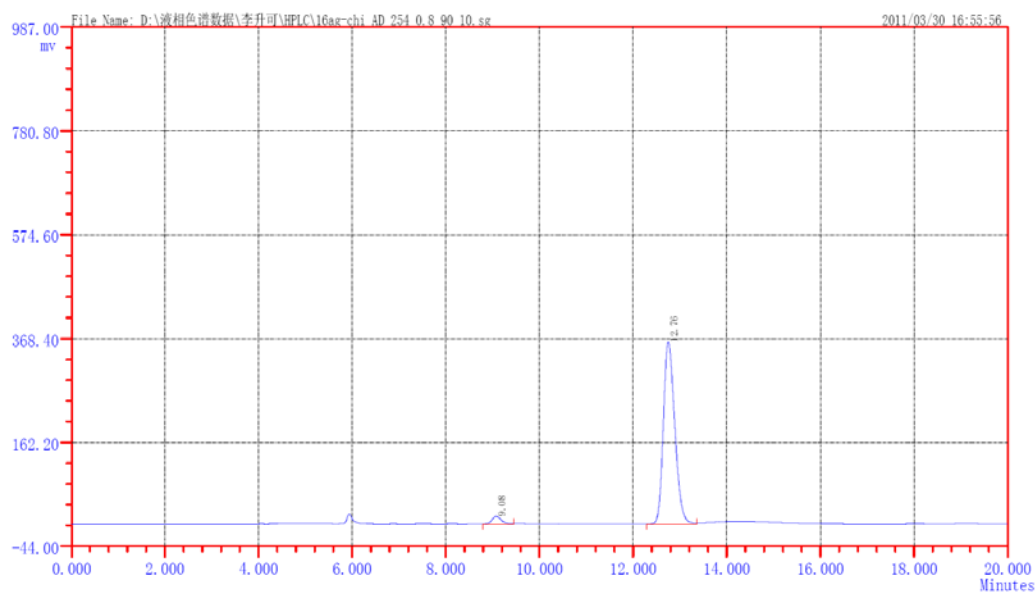

| ID | 组分名 | 保留时间   | 峰高     | 峰面积       | 浓度       | 拖尾因子 | 理论塔板  |
|----|-----|--------|--------|-----------|----------|------|-------|
| 1  |     | 9.075  | 14895  | 201283.8  | 3.1800   | 1.27 | 8988  |
| 2  |     | 12.755 | 361174 | 6128310.8 | 96.8200  | 1.23 | 11263 |
| Σ: |     |        | 376069 | 6329594.7 | 100.0000 |      |       |

| Sample | RetTime (min) | Hight | Area | Area (%) | Tailing factor | Theoretical plates (N) |
|--------|---------------|-------|------|----------|----------------|------------------------|
|--------|---------------|-------|------|----------|----------------|------------------------|

(*R,E*)-2-Benzylidene-3-(naphthalen-2-yl)cyclohexanone **5ah**. (Fig. 2, entry 7):  $[\alpha]_D^{20} +25.4$  (*c* 1.20, CHCl<sub>3</sub>) for 98 % ee. <sup>1</sup>H NMR (400 MHz, CDCl<sub>3</sub>, TMS): δ 1.62-1.75

(m, 2H), 2.15-2.27 (m, 2H), 2.44-2.53 (m, 1H), 2.68-2.74 (m, 1H), 4.65 (br s, 1H), 7.17-7.23 (m, 5H), 7.41 (dd,  $J = 1.6, 8.4$  Hz, 1H), 7.45-7.50 (m, 2H), 7.57 (s, 1H), 7.67 (s, 1H), 7.79-7.89 (m, 3H).  $^{13}\text{C}$  NMR (100 MHz,  $\text{CDCl}_3$ , TMS):  $\delta$  31.8, 40.5, 43.5, 53.4, 121.7, 125.8, 126.0, 126.3, 126.6, 127.6, 127.9, 128.4, 128.8, 130.1, 131.2, 133.4, 137.4, 138.0, 139.0, 141.4, 203.1. MS (ESI)  $m/z$  (%): 313.2 (M+H, 62); HRMS (Micromass LCT) Calcd. for  $\text{C}_{23}\text{H}_{21}\text{O}$ : 313.1592; Found: 313.1594. Chiralcel OD, hexane/*i*-PrOH = 90/10, 0.8 mL/min, 254 nm,  $t_{\text{major}} = 9.76$  min,  $t_{\text{minor}} = 8.15$  min.

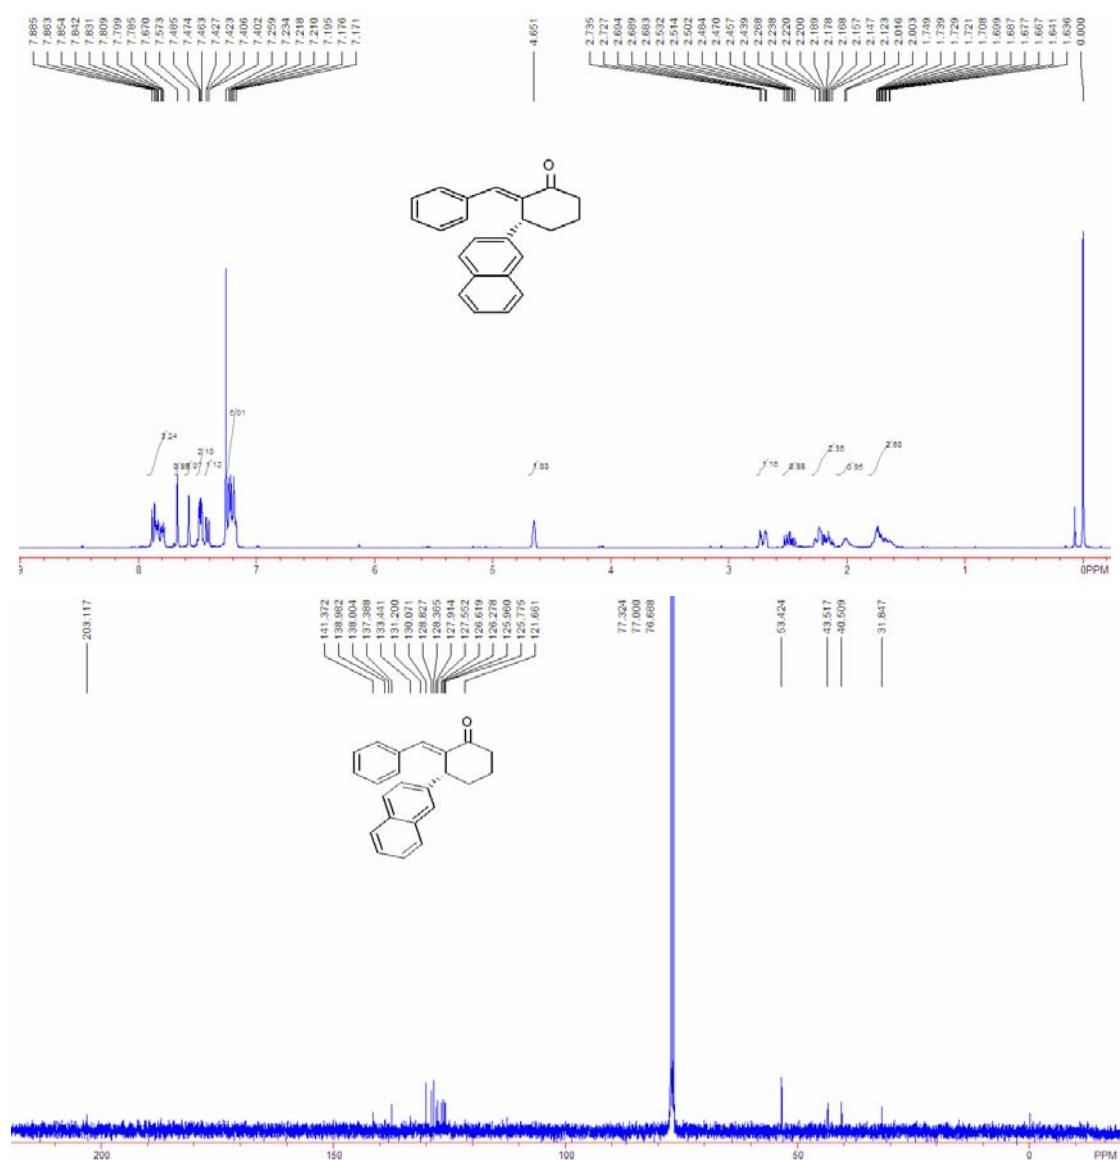

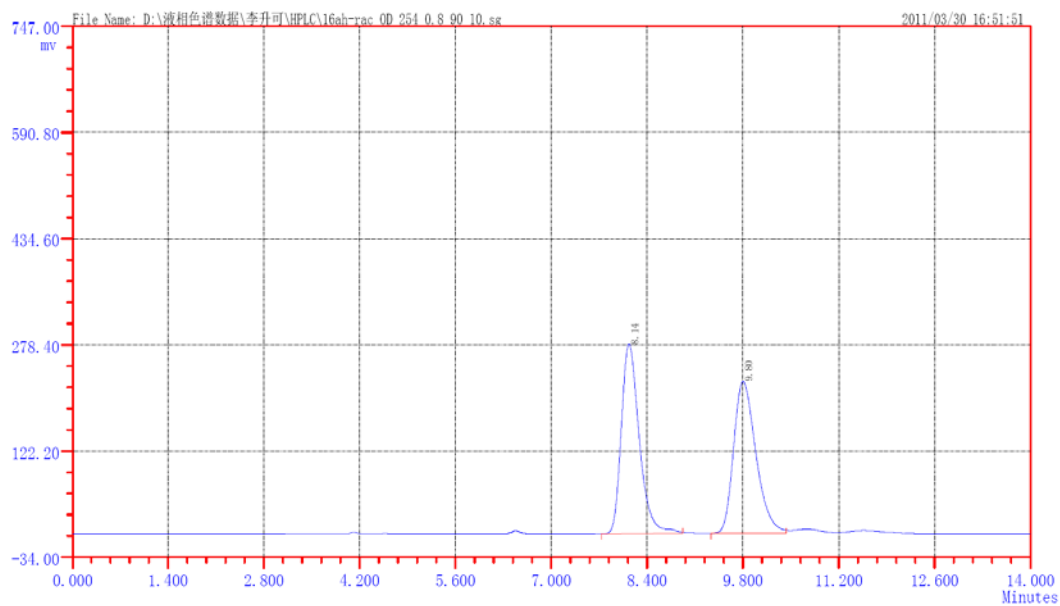

| ID     | 组分名 | 保留时间          | 峰高     | 峰面积        | 浓度       | 拖尾因子           | 理论塔板                   |
|--------|-----|---------------|--------|------------|----------|----------------|------------------------|
| 1      |     | 8.137         | 278771 | 5094116.7  | 50.0385  | 1.34           | 3952                   |
| 2      |     | 9.805         | 223386 | 5086279.5  | 49.9615  | 1.33           | 3696                   |
| Σ:     |     |               | 502157 | 10180396.2 | 100.0000 |                |                        |
| Sample |     | RetTime (min) | Hight  | Area       | Area (%) | Tailing factor | Theoretical plates (N) |

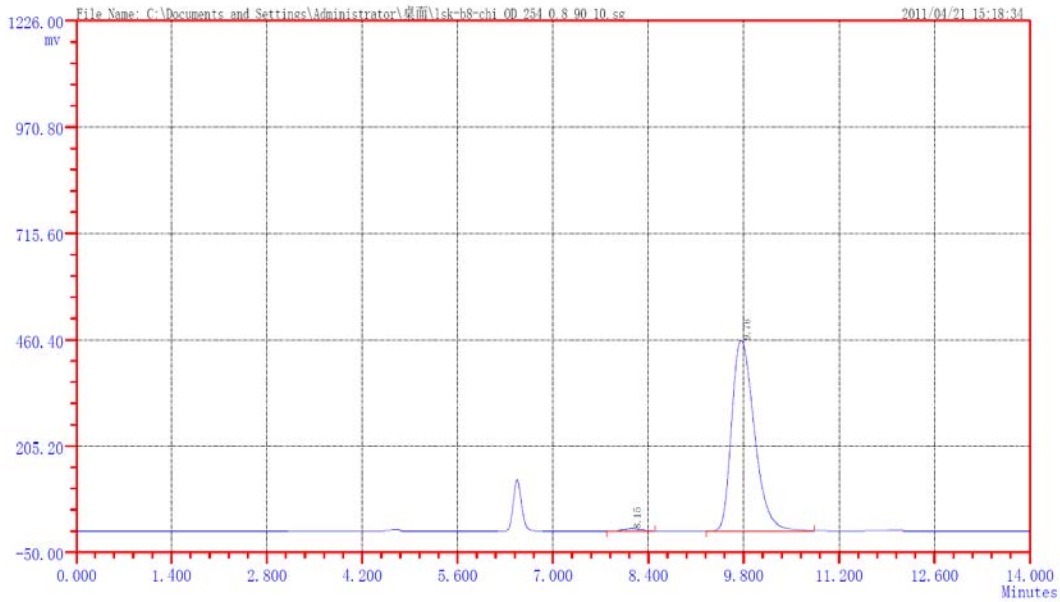

| ID     | 组分名 | 保留时间          | 峰高     | 峰面积        | 浓度       | 拖尾因子           | 理论塔板                   |
|--------|-----|---------------|--------|------------|----------|----------------|------------------------|
| 1      |     | 8.152         | 6089   | 110059.8   | 1.0225   | 1.16           | 4054                   |
| 2      |     | 9.763         | 458217 | 10653888.8 | 98.9775  | 1.37           | 3514                   |
| Σ:     |     |               | 464306 | 10763948.6 | 100.0000 |                |                        |
| Sample |     | RetTime (min) | Hight  | Area       | Area (%) | Tailing factor | Theoretical plates (N) |

(*R,E*)-2-benzylidene-3-(biphenyl-4-yl)cyclohexanone **5ai**. (Fig. 2, entry 8):  $[\alpha]_D^{20} +134.8$  (*c* 0.77, CHCl<sub>3</sub>) for 99 % ee. <sup>1</sup>H NMR (400 MHz, CDCl<sub>3</sub>, TMS):  $\delta$  1.75-1.80 (m, 2H), 2.11-2.16 (m, 2H), 2.43-2.52 (m, 1H), 2.68-2.73 (m, 1H), 4.55 (br s, 1H), 7.20-7.22 (m, 2H), 7.25-7.29 (m, 5H), 7.34 (t, *J* = 7.2 Hz, 1H), 7.44 (t, *J* = 7.2 Hz, 2H), 7.57-7.61 (m, 5H). <sup>13</sup>C NMR (100 MHz, CDCl<sub>3</sub>, TMS):  $\delta$  18.8, 32.2, 40.5, 43.1, 127.0, 127.3, 127.5, 128.2, 128.4, 128.8, 130.1, 135.0, 137.1, 139.2, 139.3, 140.6, 143.0, 203.0. MS (ESI) *m/z* (%): 377.1 (M+K, 20); HRMS (Micromass LCT) Calcd. for C<sub>25</sub>H<sub>22</sub>KO: 377.1308; Found: 377.1329. Chiralcel OD, hexane/*i*-PrOH = 90/10, 0.8 mL/min, 254 nm, *t*<sub>major</sub> = 12.02 min, *t*<sub>minor</sub> = 8.83 min.

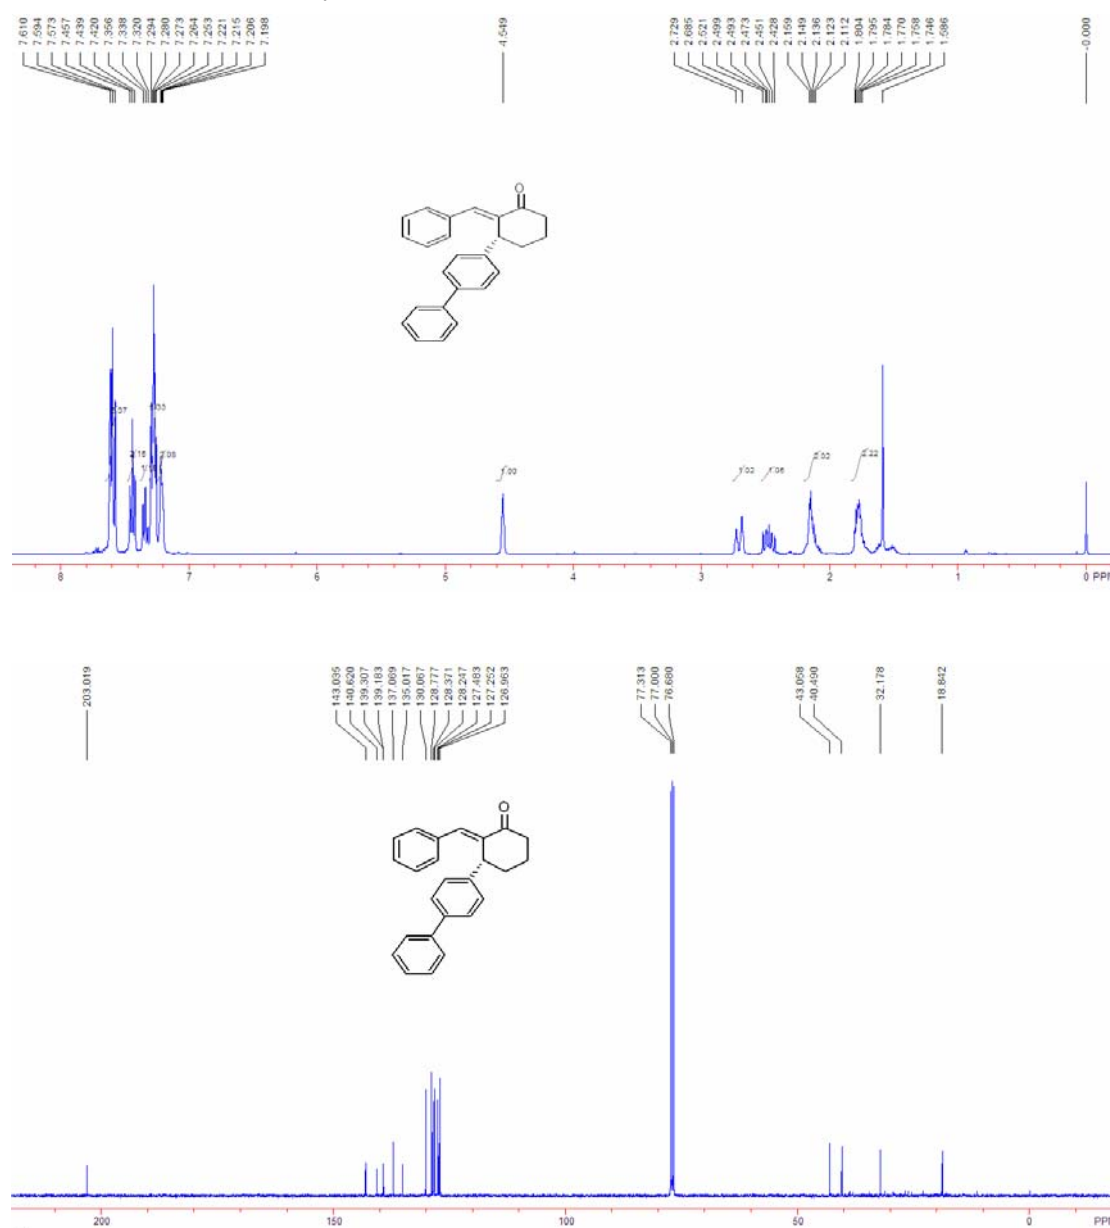

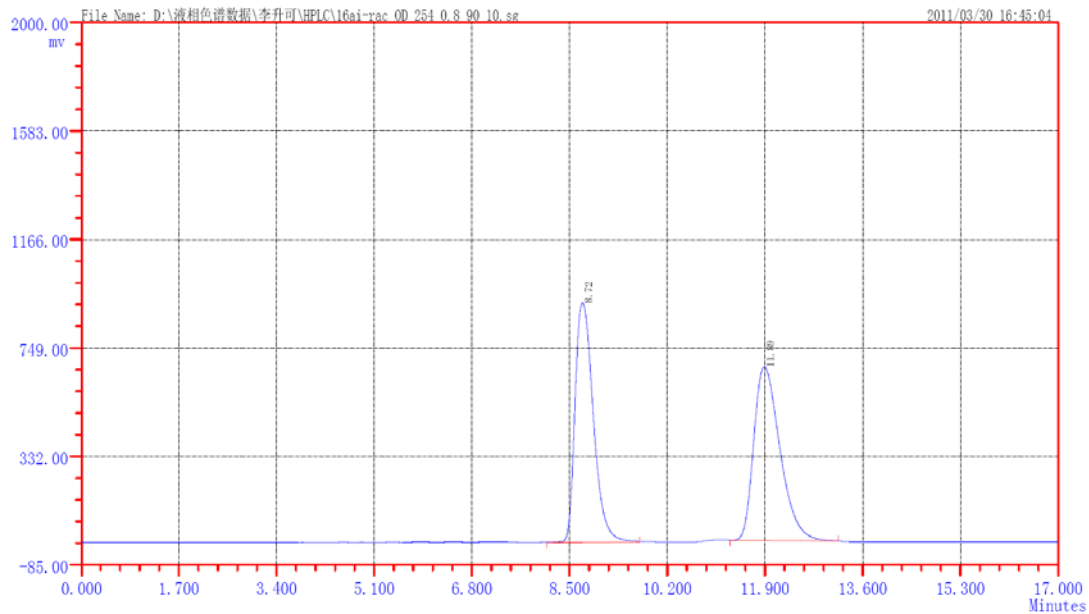

| ID | 组分名 | 保留时间   | 峰高      | 峰面积        | 浓度       | 拖尾因子 | 理论塔板 |
|----|-----|--------|---------|------------|----------|------|------|
| 1  |     | 8.725  | 920113  | 20427642.4 | 49.0233  | 1.43 | 3078 |
| 2  |     | 11.892 | 667948  | 21241594.7 | 50.9767  | 1.42 | 2787 |
| Σ: |     |        | 1588061 | 41669237.1 | 100.0000 |      |      |

| Sample | RetTime (min) | Height | Area | Area (%) | Tailing factor | Theoretical plates (N) |
|--------|---------------|--------|------|----------|----------------|------------------------|
|--------|---------------|--------|------|----------|----------------|------------------------|

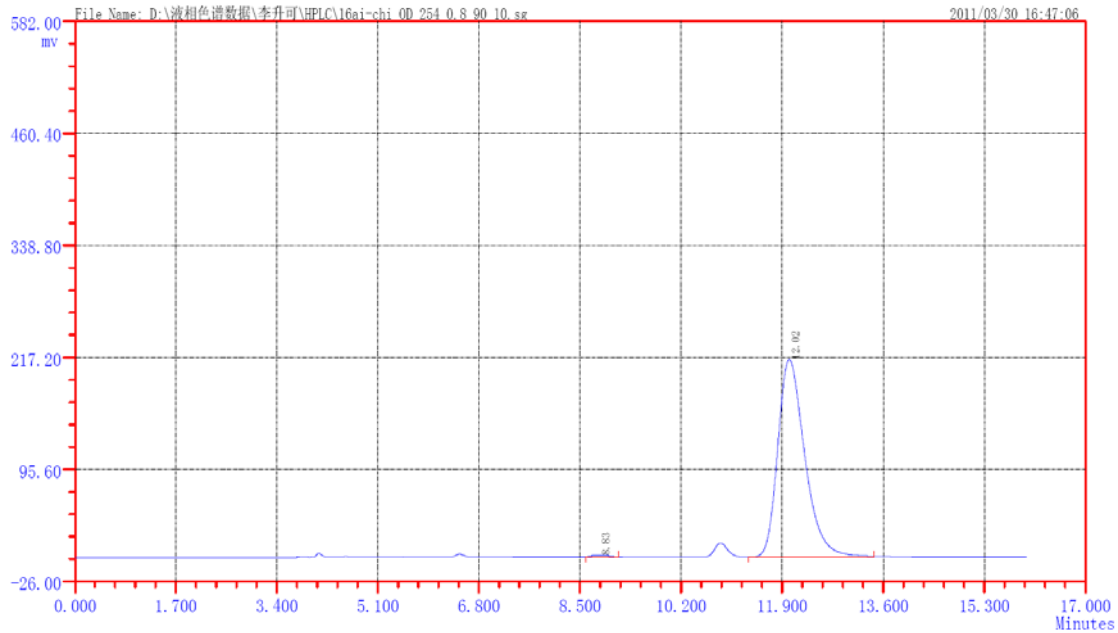

| ID | 组分名 | 保留时间   | 峰高     | 峰面积       | 浓度       | 拖尾因子 | 理论塔板 |
|----|-----|--------|--------|-----------|----------|------|------|
| 1  |     | 8.832  | 2145   | 41703.1   | 0.6098   | 1.19 | 4113 |
| 2  |     | 12.022 | 214738 | 6797289.8 | 99.3902  | 1.35 | 2875 |
| Σ: |     |        | 216883 | 6838992.9 | 100.0000 |      |      |

| Sample | RetTime (min) | Height | Area | Area (%) | Tailing factor | Theoretical plates (N) |
|--------|---------------|--------|------|----------|----------------|------------------------|
|--------|---------------|--------|------|----------|----------------|------------------------|

(*R,E*)-4-((2-oxo-6-phenylcyclohexylidene)methyl)benzonitrile **5ba** (Fig. 2, entry 9):  $[\alpha]_{\text{D}}^{20} +127.6$  (*c* 0.30, CHCl<sub>3</sub>) for 99 % ee. <sup>1</sup>H NMR (400 MHz, CDCl<sub>3</sub>, TMS): δ 1.70-1.77 (m, 2H), 2.10-2.13 (m, 2H), 2.43-2.52 (m, 1H), 2.70-2.75 (m, 1H), 4.40 (br s, 1H), 7.17 (d, *J* = 7.6 Hz, 2H), 7.22-7.29 (m, 3H), 7.36 (t, *J* = 7.6 Hz, 2H), 7.52 (d, *J* = 5.6 Hz, 2H), 7.55 (s, 1H). <sup>13</sup>C NMR (100 MHz, CDCl<sub>3</sub>, TMS): δ 18.7, 32.2, 40.6, 43.5, 111.9, 118.5, 126.8, 127.6, 129.0, 130.2, 132.0, 134.5, 139.6, 141.9, 143.3, 202.6. MS (EI) *m/z* (%): 288.1 (M+H, 100); HRMS (Micromass LCT) Calcd. for C<sub>20</sub>H<sub>18</sub>NO: 288.1388; Found: 288.1376. Chiralcel AD, hexane/*i*-PrOH = 90/10, 0.8 mL/min, 254 nm, *t*<sub>major</sub> = 20.81 min, *t*<sub>minor</sub> = 22.30 min.

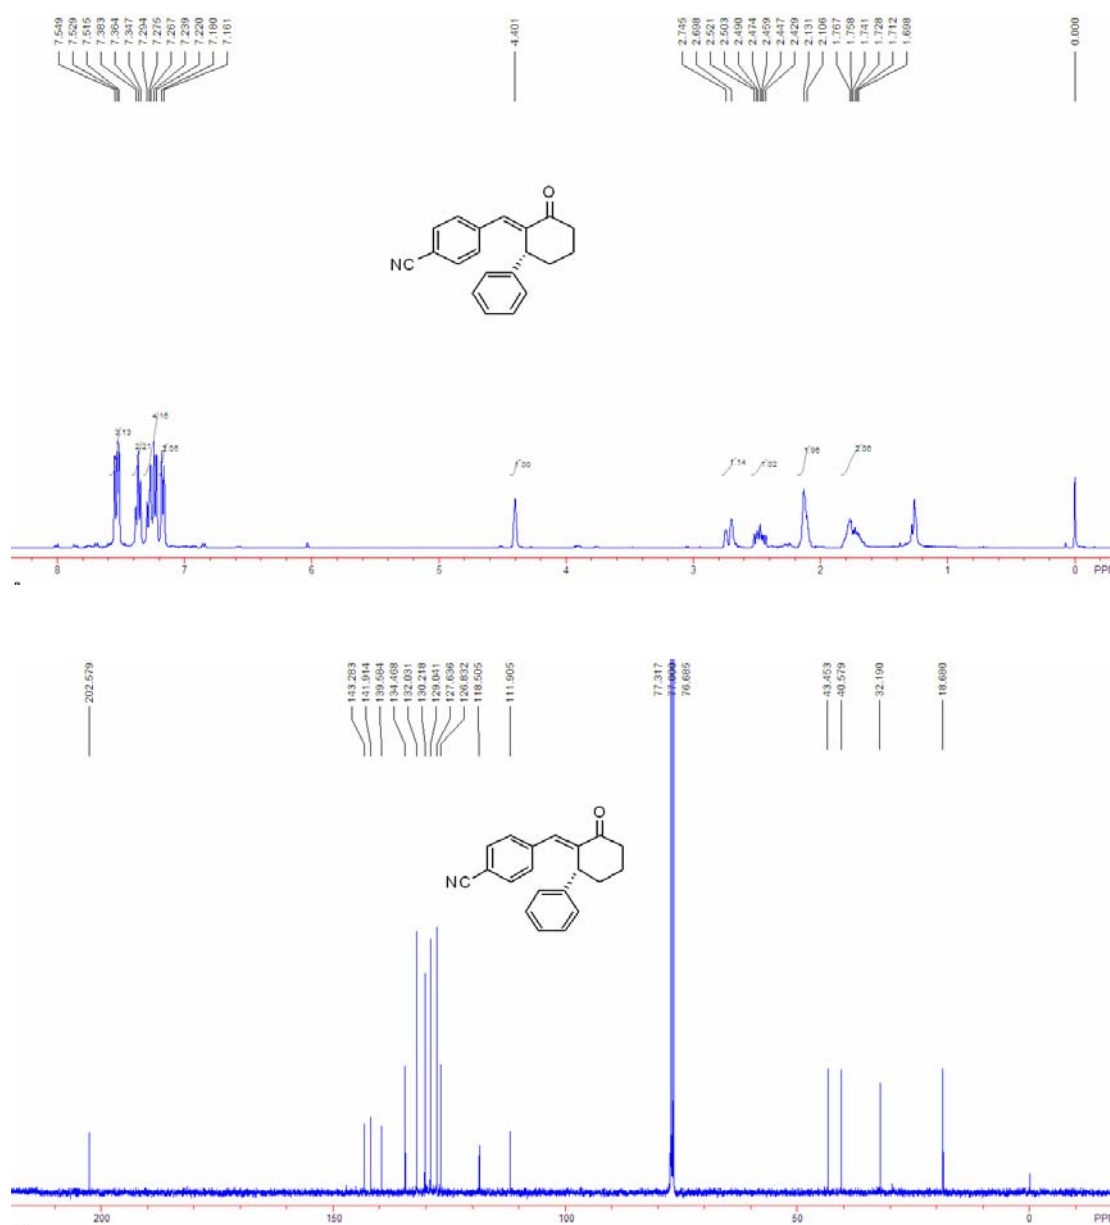

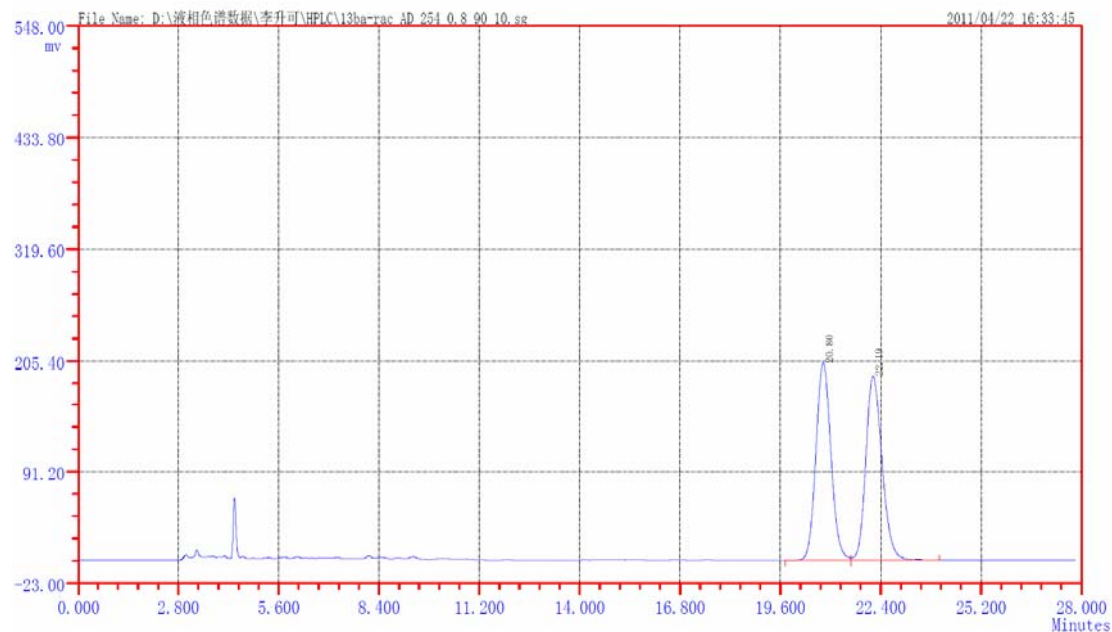

| ID | 组分名 | 保留时间   | 峰高     | 峰面积        | 浓度       | 拖尾因子 | 理论塔板  |
|----|-----|--------|--------|------------|----------|------|-------|
| 1  |     | 20.798 | 203602 | 5936662.4  | 49.8539  | 1.10 | 10141 |
| 2  |     | 22.193 | 189496 | 5971469.1  | 50.1461  | 1.20 | 9886  |
| Σ: |     |        | 393098 | 11908131.5 | 100.0000 |      |       |

| Sample | RetTime (min) | Hight | Area | Area (%) | Tailing factor | Theoretical plates (N) |
|--------|---------------|-------|------|----------|----------------|------------------------|
|--------|---------------|-------|------|----------|----------------|------------------------|

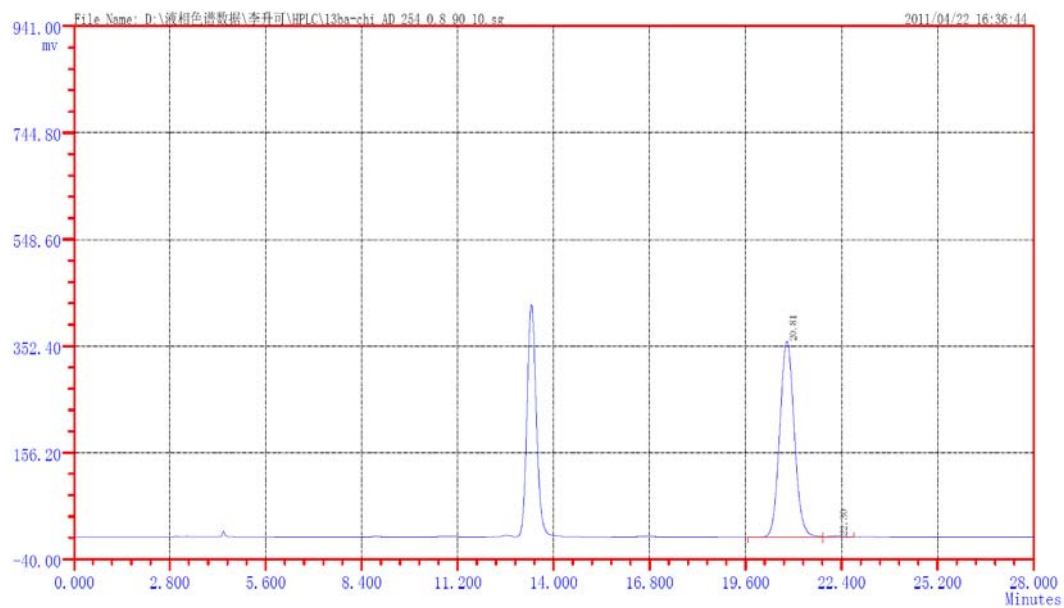

| ID | 组分名 | 保留时间   | 峰高     | 峰面积        | 浓度       | 拖尾因子 | 理论塔板 |
|----|-----|--------|--------|------------|----------|------|------|
| 1  |     | 20.810 | 360397 | 10668925.9 | 99.2816  | 1.08 | 9849 |
| 2  |     | 22.302 | 2296   | 77204.6    | 0.7184   | 1.02 | 8767 |
| Σ: |     |        | 362693 | 10746130.5 | 100.0000 |      |      |

| Sample | RetTime (min) | Hight | Area | Area (%) | Tailing factor | Theoretical plates (N) |
|--------|---------------|-------|------|----------|----------------|------------------------|
|--------|---------------|-------|------|----------|----------------|------------------------|

(*S*)-2-(hydroxy(4-isocyanophenyl)methyl)cyclohex-2-enone **3b**.<sup>[5]</sup>  $[\alpha]_D^{20} +31.3$  (*c* 0.60, CH<sub>2</sub>Cl<sub>2</sub>) for 70 % ee. <sup>1</sup>H NMR (400 MHz, CDCl<sub>3</sub>, TMS):  $\delta$  1.99-2.04 (m, 2H), 2.43-2.47 (m, 4H), 3.53 (br s, 1H), 5.56 (s, 1H), 6.80 (t, *J* = 4.0 Hz, 1H), 7.49 (d, *J* = 8.4 Hz, 2H), 7.63 (d, *J* = 8.4 Hz, 2H). Chiralcel OJ, hexane/*i*-PrOH = 90/10, 0.8 mL/min, 230 nm,  $t_{major}$  = 64.87 min,  $t_{minor}$  = 55.65 min.

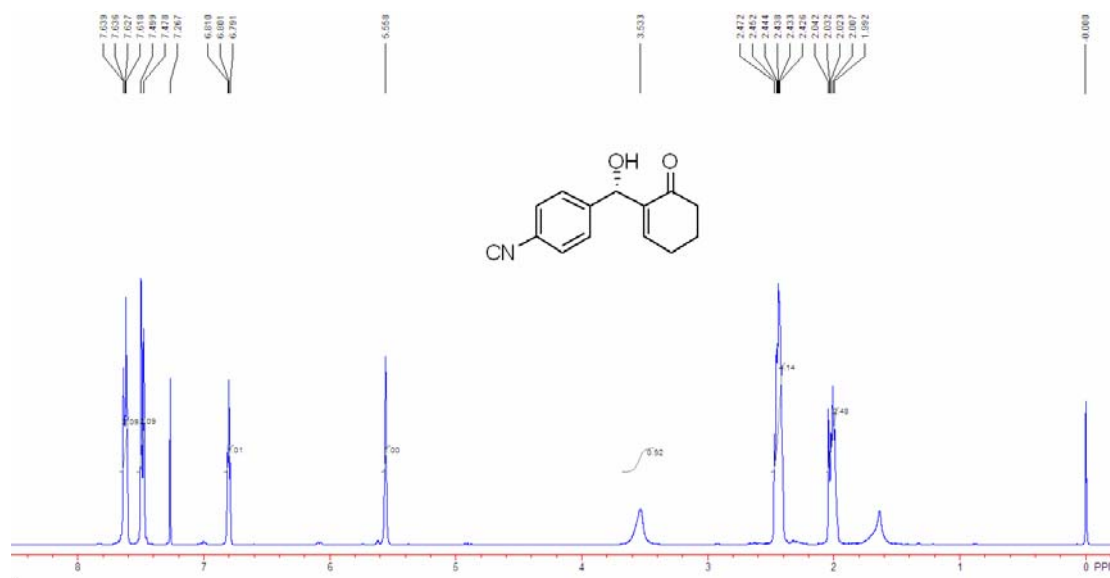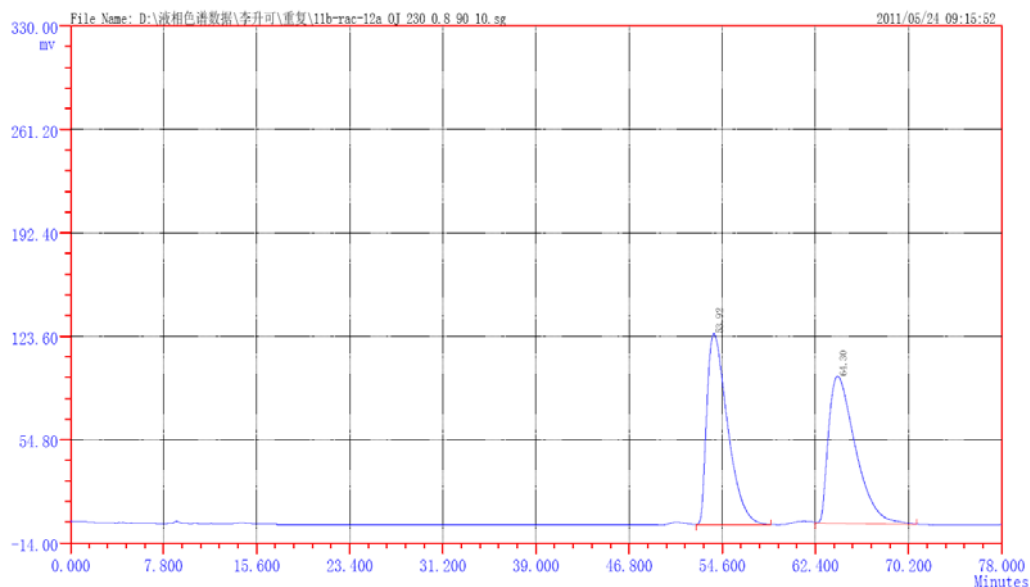

| ID         | 组分名 | 保留时间   | 峰高     | 峰面积        | 浓度       | 拖尾因子 | 理论塔板 |
|------------|-----|--------|--------|------------|----------|------|------|
| 1          |     | 53.917 | 127212 | 15405059.5 | 49.9979  | 1.86 | 3951 |
| 2          |     | 64.295 | 98230  | 15406337.1 | 50.0021  | 1.88 | 3349 |
| $\Sigma$ : |     |        | 225442 | 30811396.6 | 100.0000 |      |      |

| Sample | RetTime (min) | Hight | Area | Area (%) | Tailing factor | Theoretical plates (N) |
|--------|---------------|-------|------|----------|----------------|------------------------|
|--------|---------------|-------|------|----------|----------------|------------------------|



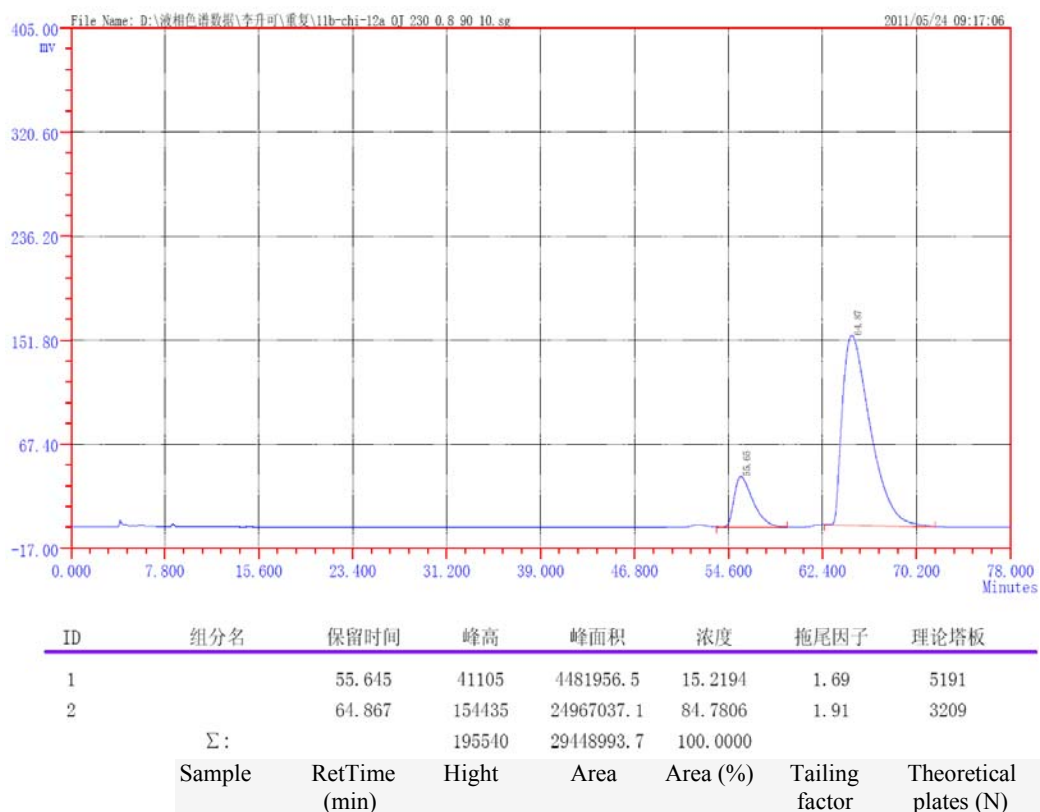

(*R,E*)-2-(4-methylbenzylidene)-3-phenylcyclohexanone **5ca** (Fig. 2, entry 10):  $[\alpha]_D^{20} +167.9$  (*c* 0.41, CHCl<sub>3</sub>) for 99 % ee. <sup>1</sup>H NMR (400 MHz, CDCl<sub>3</sub>, TMS): δ 1.68-1.75 (m, 2H), 2.08-2.12 (m, 2H), 2.31 (s, 3H), 2.41-2.50 (m, 1H), 2.65-2.70 (m, 1H), 4.51 (br s, 1H), 7.06-7.12 (m, 4H), 7.21-7.27 (m, 3H), 7.35 (t, *J* = 7.6 Hz, 2H), 7.58 (s, 1H). <sup>13</sup>C NMR (100 MHz, CDCl<sub>3</sub>, TMS): δ 18.7, 21.3, 32.2, 40.4, 43.4, 126.4, 127.9, 128.8, 129.1, 130.2, 132.1, 137.3, 138.3, 139.1, 144.1, 203.0. MS (EI) *m/z* (%): 276.2 (M, 100); HRMS (Micromass LCT) Calcd. for C<sub>20</sub>H<sub>20</sub>O: 276.1514; Found: 276.1513. Chiralcel AD, hexane/*i*-PrOH = 90/10, 0.8 mL/min, 254 nm, *t*<sub>major</sub> = 13.66 min, *t*<sub>minor</sub> = 12.20 min.

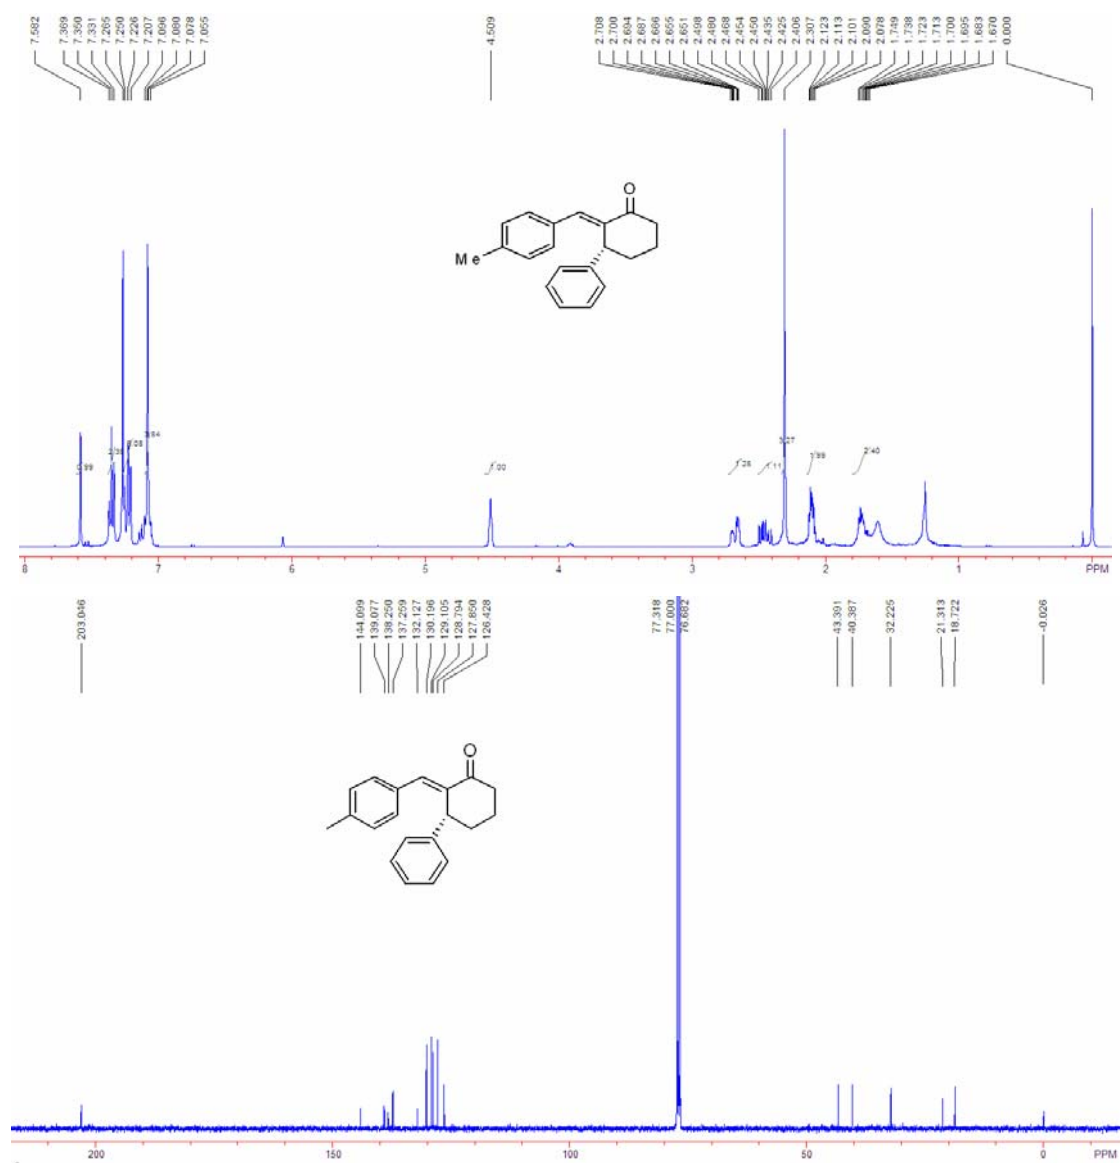

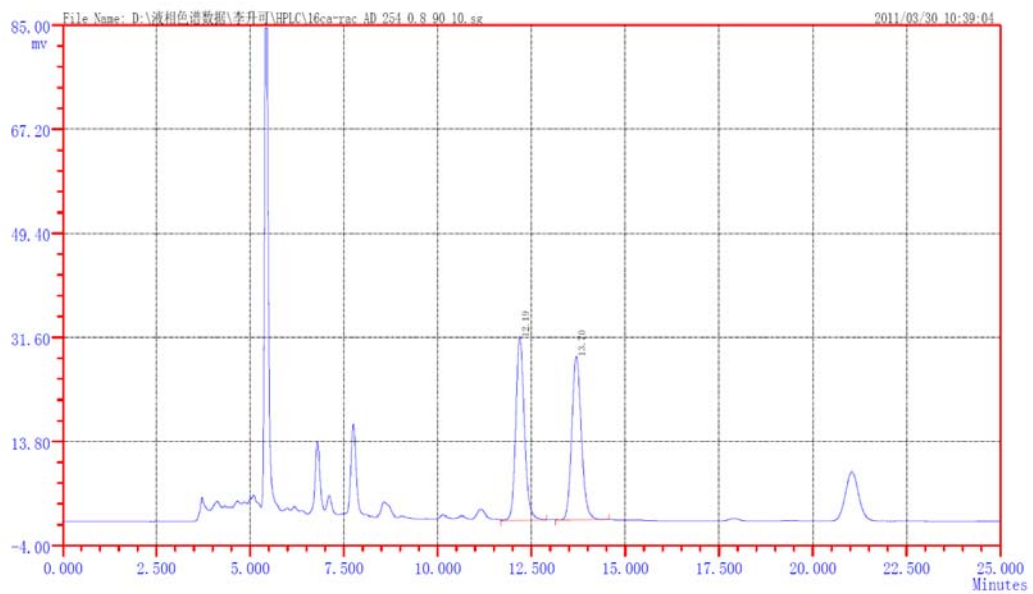

| ID | 组分名 | 保留时间   | 峰高    | 峰面积      | 浓度       | 拖尾因子 | 理论塔板  |
|----|-----|--------|-------|----------|----------|------|-------|
| 1  |     | 12.188 | 31421 | 501437.2 | 50.1913  | 1.17 | 11626 |
| 2  |     | 13.700 | 28005 | 497614.9 | 49.8087  | 1.12 | 11848 |
| Σ: |     |        | 59426 | 999052.1 | 100.0000 |      |       |

| Sample | RetTime (min) | Hight | Area | Area (%) | Tailing factor | Theoretical plates (N) |
|--------|---------------|-------|------|----------|----------------|------------------------|
|--------|---------------|-------|------|----------|----------------|------------------------|

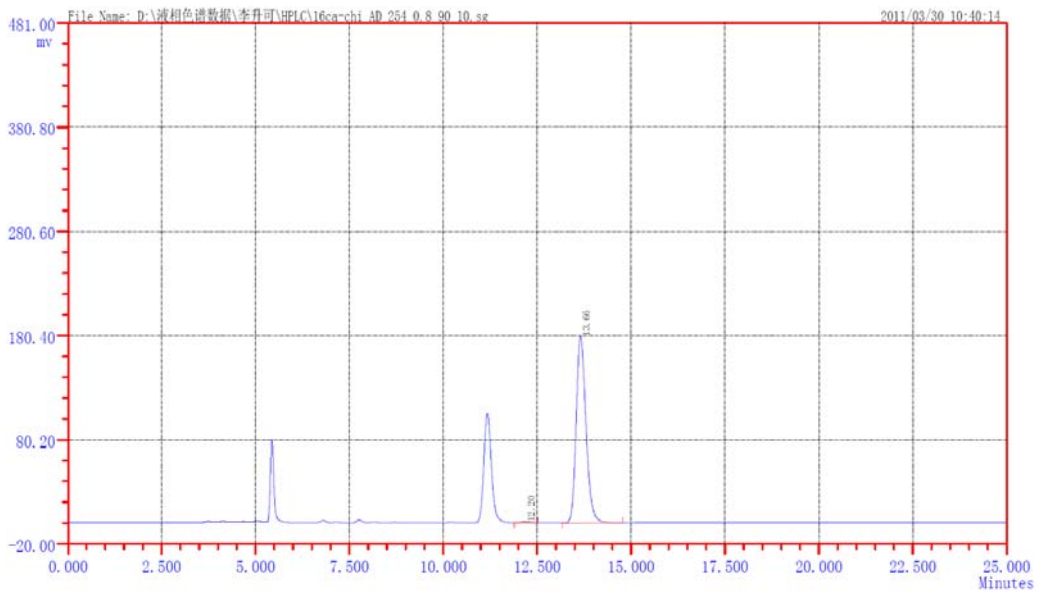

| ID | 组分名 | 保留时间   | 峰高     | 峰面积       | 浓度       | 拖尾因子 | 理论塔板  |
|----|-----|--------|--------|-----------|----------|------|-------|
| 1  |     | 12.198 | 1067   | 17820.7   | 0.5451   | 0.95 | 10632 |
| 2  |     | 13.657 | 179635 | 3251340.9 | 99.4549  | 1.22 | 11347 |
| Σ: |     |        | 180702 | 3269161.6 | 100.0000 |      |       |

| Sample | RetTime (min) | Hight | Area | Area (%) | Tailing factor | Theoretical plates (N) |
|--------|---------------|-------|------|----------|----------------|------------------------|
|--------|---------------|-------|------|----------|----------------|------------------------|

(*S*)-2-(hydroxy(p-tolyl)methyl)cyclohex-2-enone **3c**.<sup>[6]</sup>  $[\alpha]_{\text{D}}^{20} +2.7$  (*c* 1.0, CH<sub>2</sub>Cl<sub>2</sub>) for 36 % ee. <sup>1</sup>H NMR (400 MHz, CDCl<sub>3</sub>, TMS):  $\delta$  1.97-2.00 (m, 2H), 2.33 (s, 3H), 2.36-2.46 (m, 4H), 3.43 (br s, 1H), 5.52 (s, 1H), 6.75 (t, *J* = 4.4 Hz, 1H), 7.14 (d, *J* = 7.6 Hz, 2H), 7.24 (d, *J* = 7.6 Hz, 2H). Chiralcel AS, hexane/*i*-PrOH = 90/10, 0.8 mL/min, 230 nm,  $t_{\text{major}}$  = 15.55 min,  $t_{\text{minor}}$  = 19.13 min.

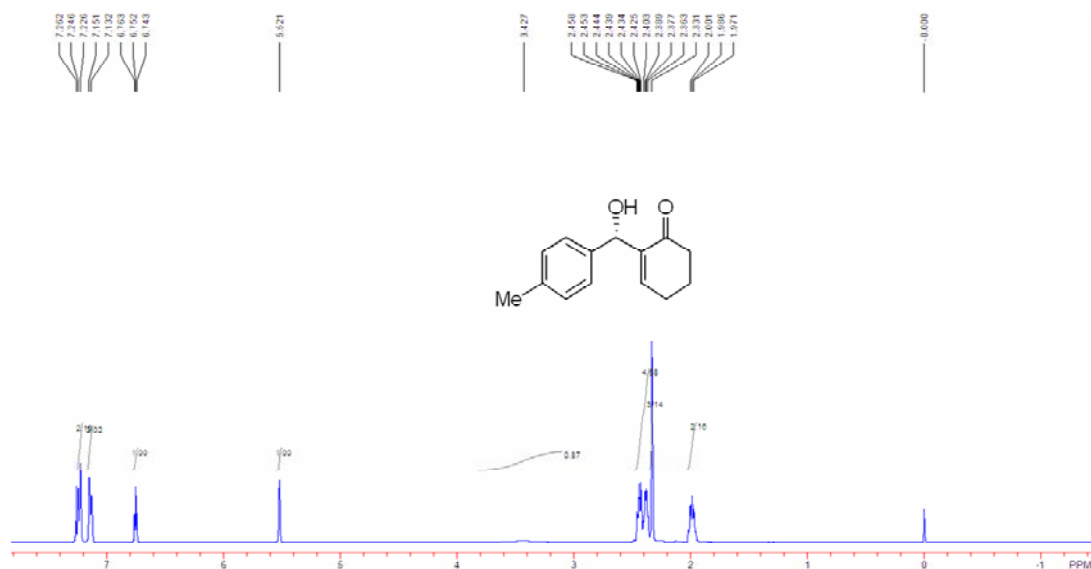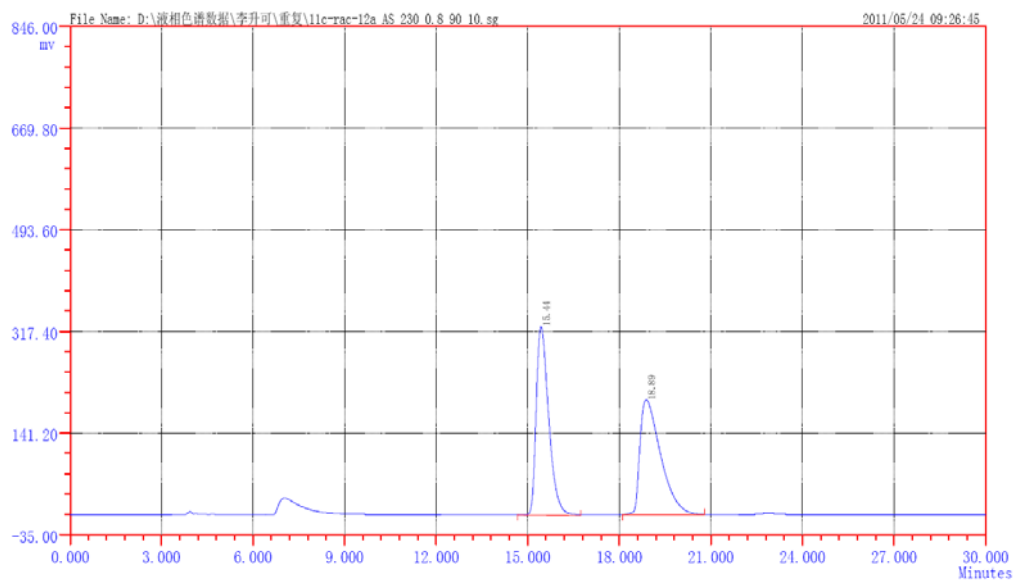

| ID         | 组分名 | 保留时间   | 峰高     | 峰面积        | 浓度       | 拖尾因子 | 理论塔板 |
|------------|-----|--------|--------|------------|----------|------|------|
| 1          |     | 15.438 | 326426 | 9269329.6  | 49.7683  | 1.52 | 5891 |
| 2          |     | 18.893 | 198770 | 9355633.8  | 50.2317  | 2.07 | 3211 |
| $\Sigma$ : |     |        | 525196 | 18624963.4 | 100.0000 |      |      |

| Sample | RetTime (min) | Hight | Area | Area (%) | Tailing factor | Theoretical plates (N) |
|--------|---------------|-------|------|----------|----------------|------------------------|
|--------|---------------|-------|------|----------|----------------|------------------------|

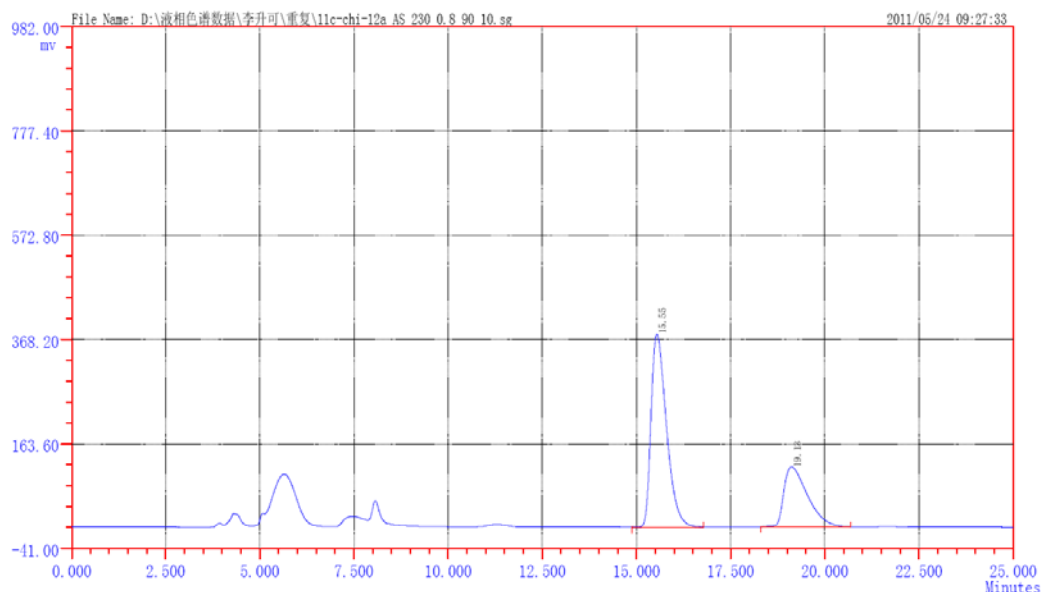

| ID         | 组分名 | 保留时间   | 峰高     | 峰面积        | 浓度       | 拖尾因子 | 理论塔板 |
|------------|-----|--------|--------|------------|----------|------|------|
| 1          |     | 15.547 | 379351 | 10887409.0 | 67.7475  | 1.54 | 5848 |
| 2          |     | 19.128 | 118002 | 5183159.1  | 32.2525  | 1.87 | 3780 |
| $\Sigma$ : |     |        | 497353 | 16070568.1 | 100.0000 |      |      |

| Sample | RetTime (min) | Height | Area | Area (%) | Tailing factor | Theoretical plates (N) |
|--------|---------------|--------|------|----------|----------------|------------------------|
|--------|---------------|--------|------|----------|----------------|------------------------|

(*R,E*)-2-(4-methoxybenzylidene)-3-phenylcyclohexanone **5da** (Fig. 2, entry 11).  $[\alpha]_D^{20} +323.4$  (*c* 1.0, CHCl<sub>3</sub>) for 98 % ee. <sup>1</sup>H NMR (400 MHz, CDCl<sub>3</sub>, TMS):  $\delta$  1.69-1.74 (m, 2H), 2.09-2.13 (m, 2H), 2.40-2.49 (m, 1H), 2.63-2.70 (m, 1H), 3.77 (s, 3H), 4.50 (br s, 1H), 6.78 (d, *J* = 8.4 Hz, 2H), 7.16 (d, *J* = 8.4 Hz, 2H), 7.22-7.25 (m, 3H), 7.33-7.37 (m, 2H), 7.59 (s, 1H). <sup>13</sup>C NMR (100 MHz, CDCl<sub>3</sub>, TMS):  $\delta$  18.7, 32.3, 40.2, 43.4, 55.2, 113.9, 126.5, 127.9, 128.8, 130.4, 132.1, 136.9, 137.3, 144.1, 160.1, 202.7. MS (EI) *m/z* (%): 292.1 (M, 100); HRMS (Micromass LCT) Calcd. for C<sub>20</sub>H<sub>20</sub>O<sub>2</sub>: 292.1463; Found: 292.1465. Chiralcel AD, hexane/*i*-PrOH = 90/10, 0.8 mL/min, 254 nm, *t*<sub>major</sub> = 16.44 min, *t*<sub>minor</sub> = 18.99 min.

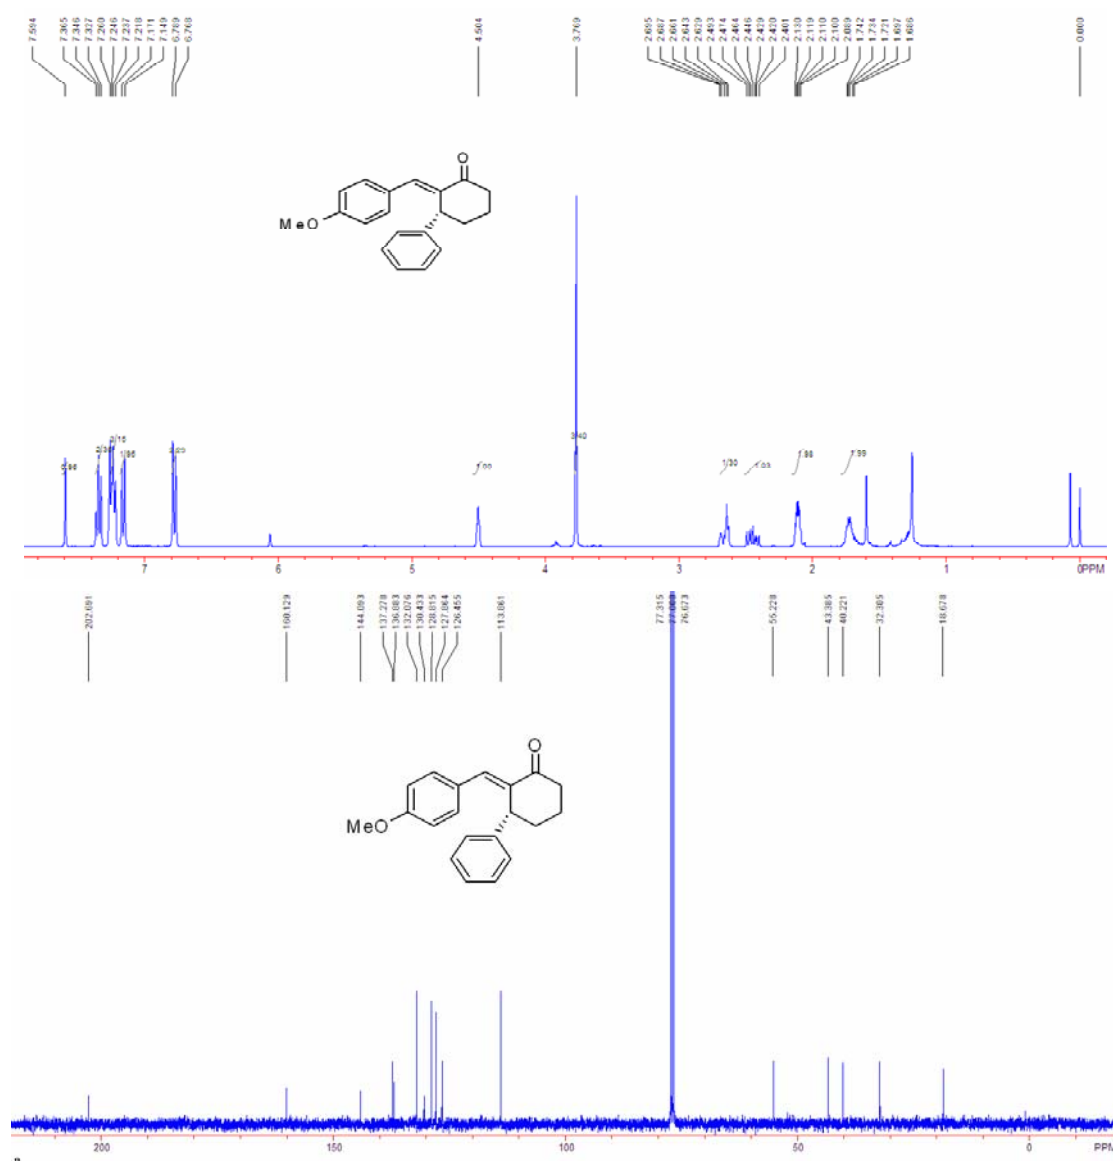

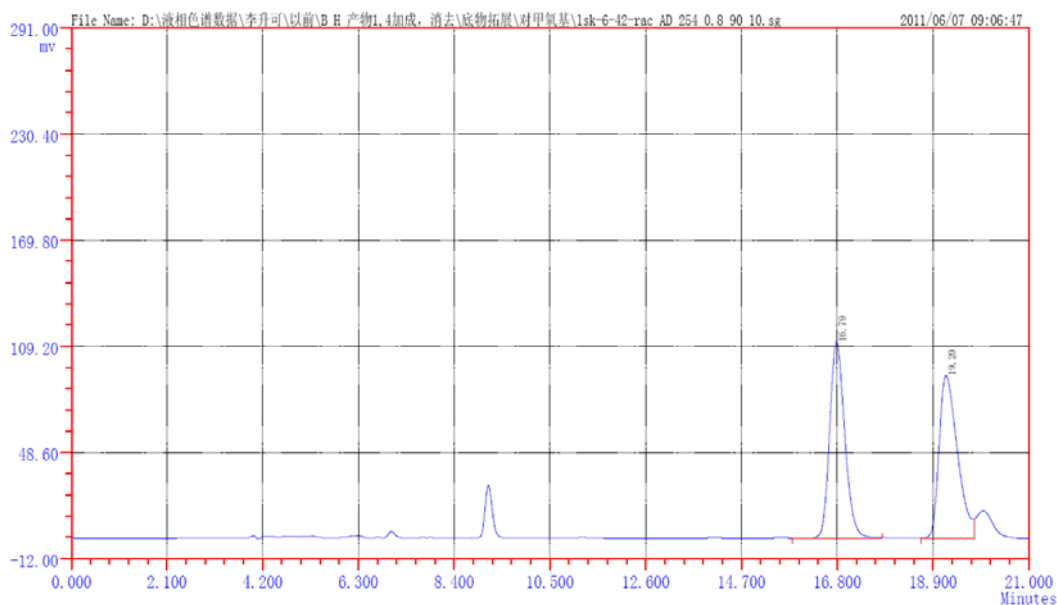

| ID     | 组分名           | 保留时间   | 峰高     | 峰面积       | 浓度             | 拖尾因子                   | 理论塔板  |
|--------|---------------|--------|--------|-----------|----------------|------------------------|-------|
| 1      |               | 16.790 | 112212 | 2612570.5 | 50.0183        | 1.20                   | 10365 |
| 2      |               | 19.195 | 93012  | 2610655.4 | 49.9817        | 1.46                   | 9321  |
| Σ:     |               |        | 205224 | 5223226.0 | 100.0000       |                        |       |
| Sample | RetTime (min) | Hight  | Area   | Area (%)  | Tailing factor | Theoretical plates (N) |       |

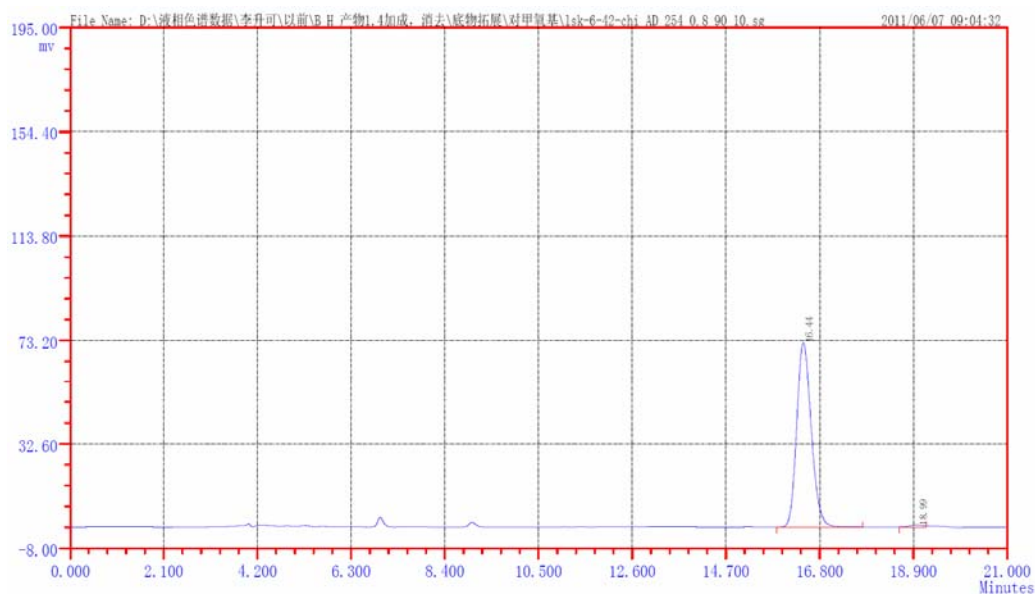

| ID     | 组分名           | 保留时间   | 峰高    | 峰面积       | 浓度             | 拖尾因子                   | 理论塔板  |
|--------|---------------|--------|-------|-----------|----------------|------------------------|-------|
| 1      |               | 16.437 | 72297 | 1635186.1 | 98.7954        | 1.20                   | 10526 |
| 2      |               | 18.993 | 902   | 19936.8   | 1.2046         | 0.75                   | 14717 |
| Σ:     |               |        | 73199 | 1655122.9 | 100.0000       |                        |       |
| Sample | RetTime (min) | Hight  | Area  | Area (%)  | Tailing factor | Theoretical plates (N) |       |

(*S*)-2-(hydroxy(4-methoxyphenyl)methyl)cyclohex-2-enone **3d**.<sup>[7]</sup>  $[\alpha]_D^{20} +0.4$  (*c* 1.2, CH<sub>2</sub>Cl<sub>2</sub>) for 32 % ee. <sup>1</sup>H NMR (400 MHz, CDCl<sub>3</sub>, TMS):  $\delta$  1.98-2.02 (m, 2H),

2.37-2.46 (m, 4H), 3.38 (br s, 1H), 3.80 (s, 3H), 5.51 (s, 1H), 7.74 (t,  $J = 4.4$  Hz, 1H), 6.85-6.88 (m, 2H), 7.25-7.28 (m, 2H). Chiralcel AS, hexane/*i*-PrOH = 90/10, 0.8 mL/min, 230 nm,  $t_{major} = 53.45$  min,  $t_{minor} = 48.04$  min.

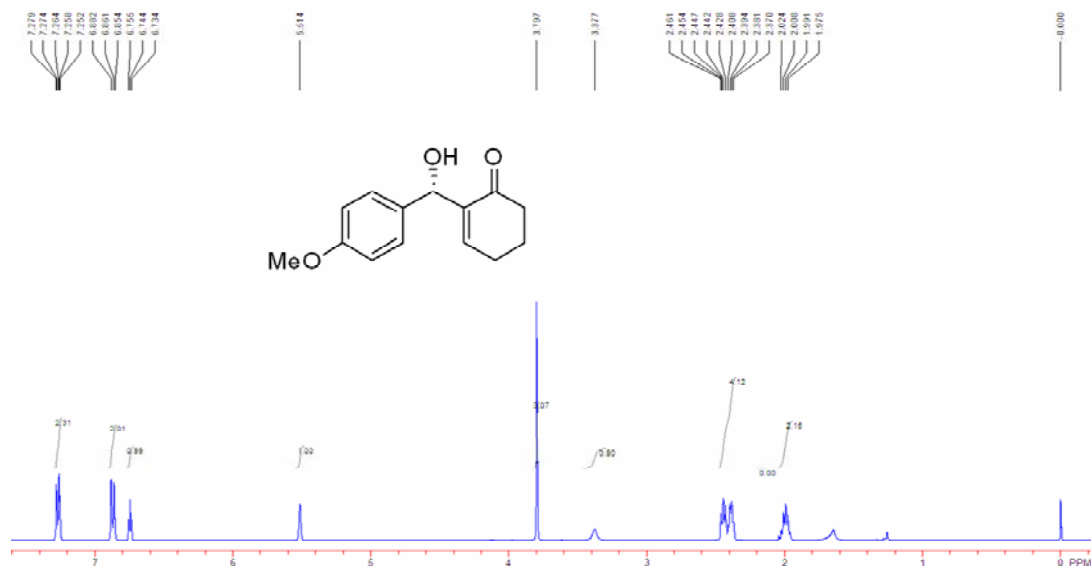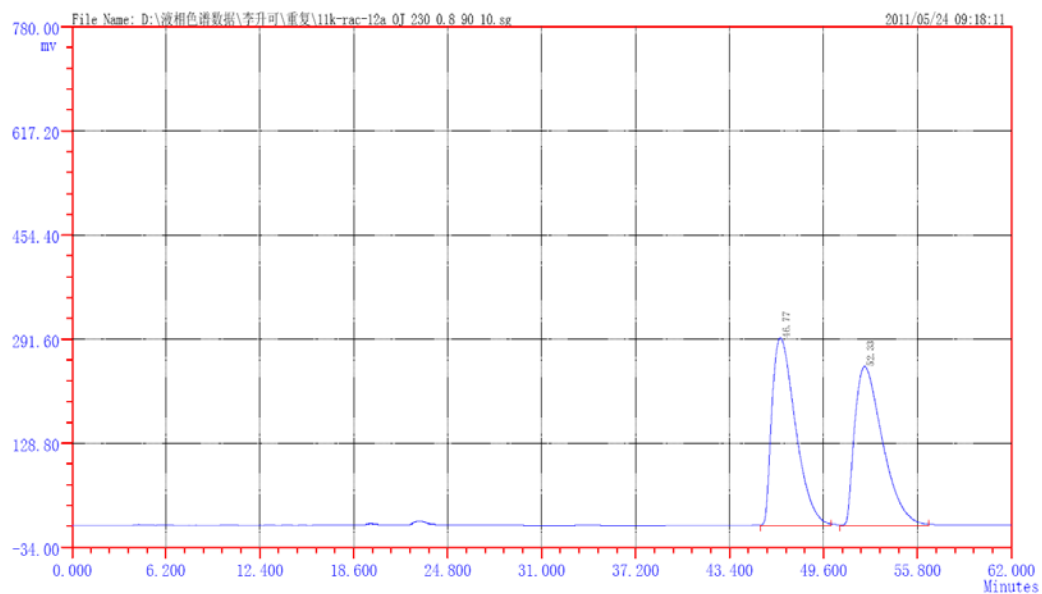

| ID | 组分名    | 保留时间          | 峰高     | 峰面积        | 浓度       | 拖尾因子           | 理论塔板                   |
|----|--------|---------------|--------|------------|----------|----------------|------------------------|
| 1  |        | 46.772        | 293174 | 31630164.8 | 49.8808  | 1.75           | 3746                   |
| 2  |        | 52.333        | 248374 | 31781322.9 | 50.1192  | 1.81           | 3334                   |
|    | Σ:     |               | 541548 | 63411487.6 | 100.0000 |                |                        |
|    | Sample | RetTime (min) | Hight  | Area       | Area (%) | Tailing factor | Theoretical plates (N) |



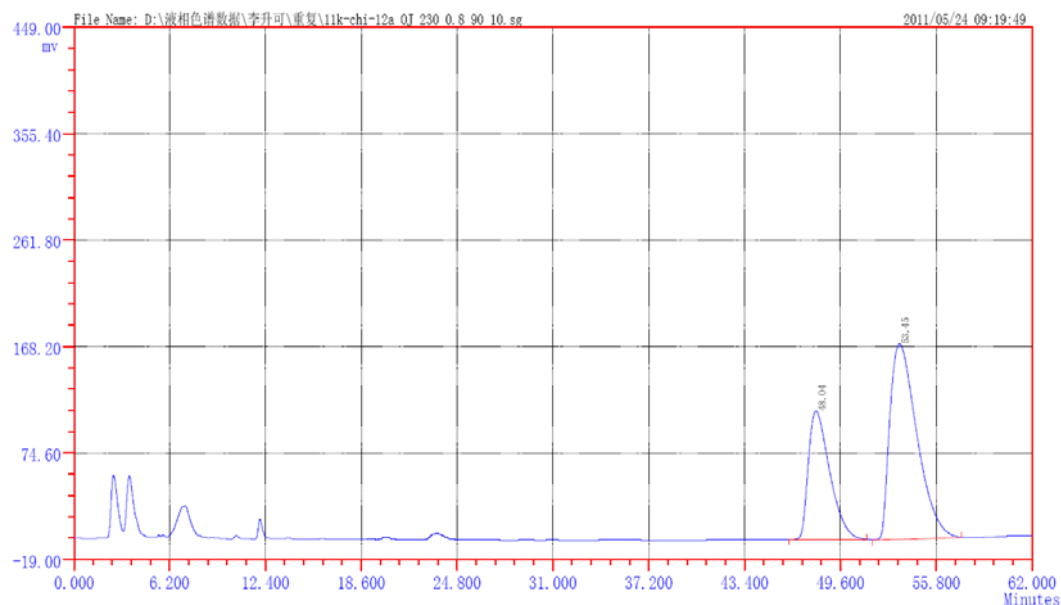

| ID  | 组分名    | 保留时间          | 峰高     | 峰面积        | 浓度       | 拖尾因子           | 理论塔板                   |
|-----|--------|---------------|--------|------------|----------|----------------|------------------------|
| 1   |        | 48.043        | 113121 | 10936061.8 | 34.1966  | 1.66           | 4922                   |
| 2   |        | 53.450        | 172195 | 21043930.1 | 65.8034  | 1.79           | 3812                   |
| Σ : |        |               | 285316 | 31979991.9 | 100.0000 |                |                        |
|     | Sample | RetTime (min) | Hight  | Area       | Area (%) | Tailing factor | Theoretical plates (N) |

(*R,E*)-2-(3-chlorobenzylidene)-3-phenylcyclohexanone **5ea** (Fig. 2, entry 12):  $[\alpha]_D^{20}$  +106.0 (*c* 0.37, CHCl<sub>3</sub>) for 99 % ee. <sup>1</sup>H NMR (400 MHz, CDCl<sub>3</sub>, TMS): δ 1.71-1.78 (m, 2H), 2.08-2.12 (m, 2H), 2.41-2.51 (m, 1H), 2.67-2.73 (m, 1H), 4.44 (t, *J* = 3.6 Hz, 1H), 7.01 (d, *J* = 8.0 Hz, 1H), 7.15-7.19 (m, 4H), 7.22-7.27 (m, 2H), 7.33-7.37 (m, 2H), 7.49 (s, 1H). <sup>13</sup>C NMR (100 MHz, CDCl<sub>3</sub>, TMS): δ 18.7, 32.3, 40.5, 43.4, 126.6, 127.7, 127.9, 128.6, 128.9, 129.5, 129.8, 134.2, 135.3, 136.8, 140.5, 143.8, 202.7. MS (EI) *m/z* (%): 297.1 (M+H, 100); HRMS (Micromass LCT) Calcd. for C<sub>19</sub>H<sub>18</sub>ClO: 297.1046; Found: 297.0949. Chiralcel AD, hexane/*i*-PrOH = 90/10, 0.8 mL/min, 254 nm, *t*<sub>major</sub> = 7.57 min, *t*<sub>minor</sub> = 6.68 min.

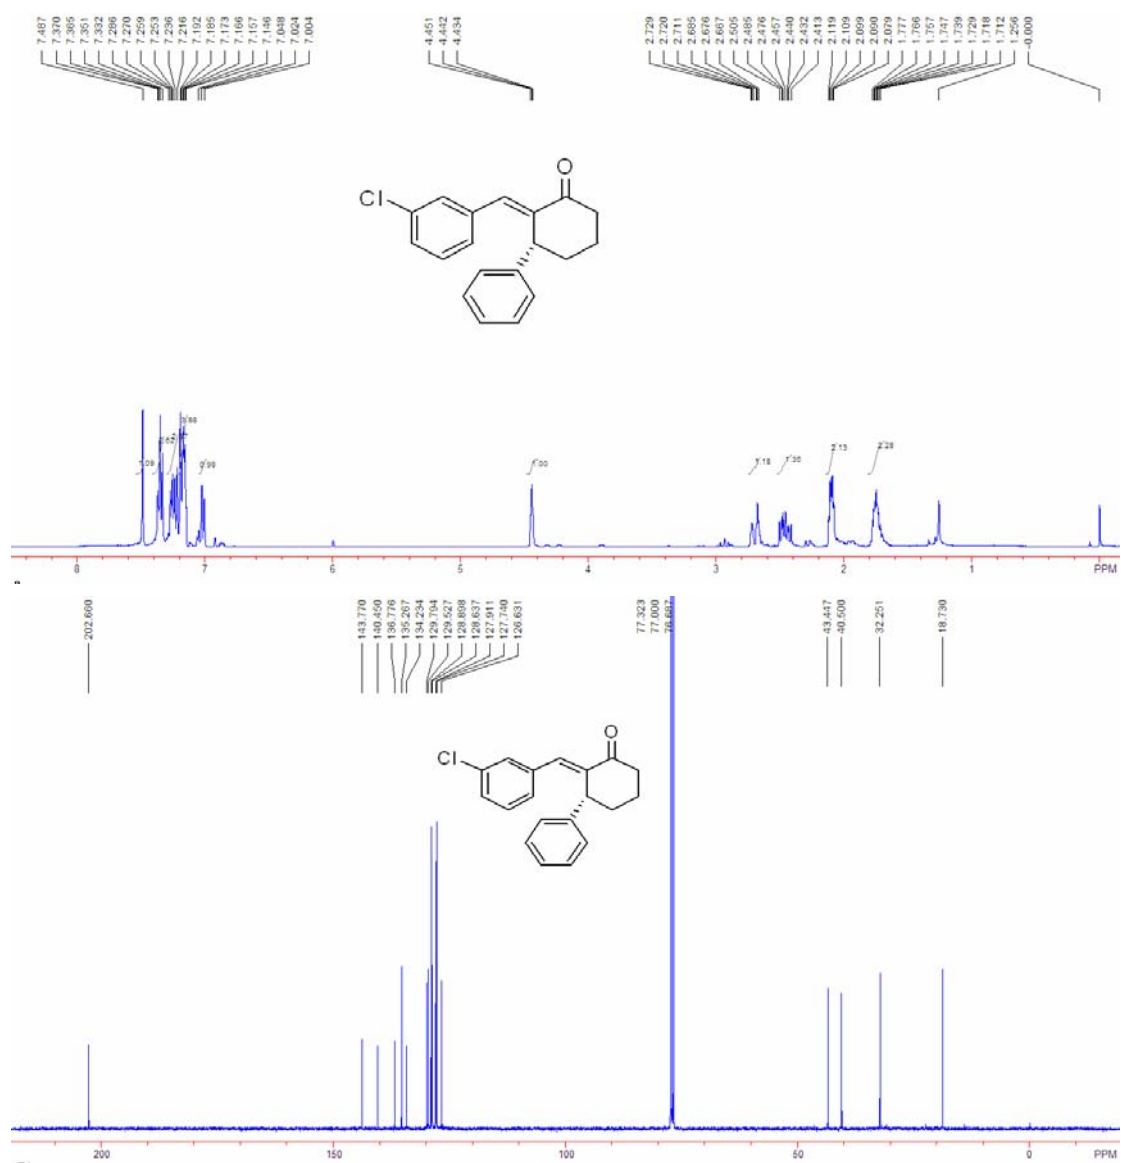

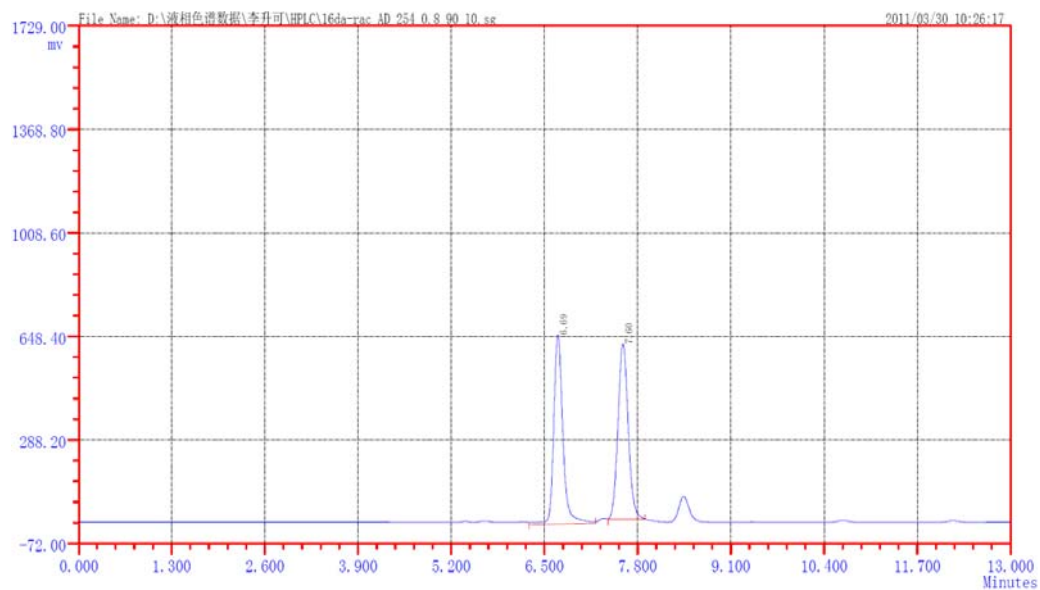

| ID | 组分名 | 保留时间    | 峰高         | 峰面积       | 浓度      | 拖尾因子 | 理论塔板  |
|----|-----|---------|------------|-----------|---------|------|-------|
| 1  |     | 6.688   | 656872     | 5868468.0 | 49.1067 | 1.27 | 11170 |
| 2  |     | 7.595   | 611250     | 6081974.0 | 50.8933 | 1.10 | 11613 |
| Σ: |     | 1268122 | 11950442.1 | 100.0000  |         |      |       |

| Sample | RetTime (min) | Hight | Area | Area (%) | Tailing factor | Theoretical plates (N) |
|--------|---------------|-------|------|----------|----------------|------------------------|
|--------|---------------|-------|------|----------|----------------|------------------------|

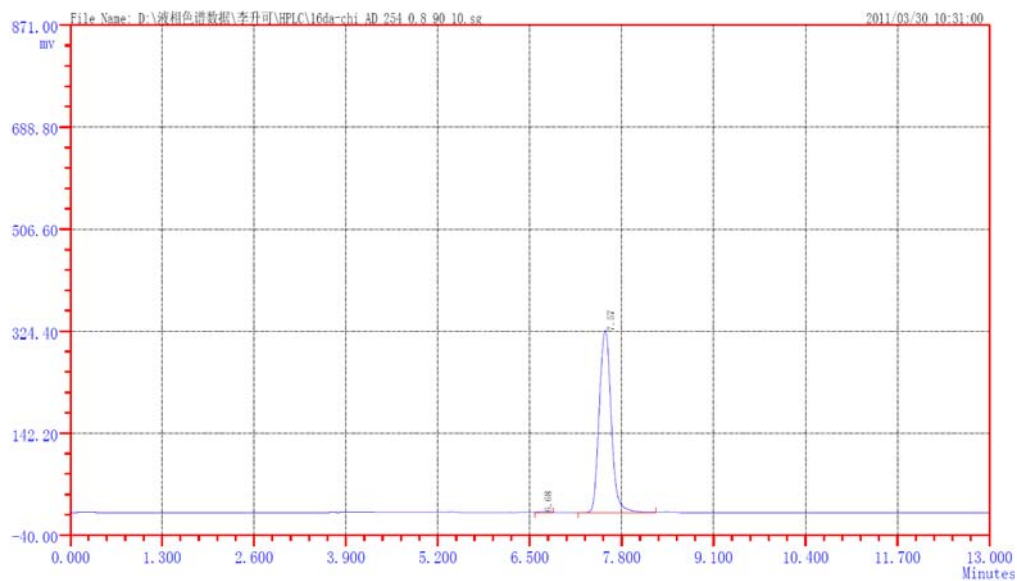

| ID | 组分名 | 保留时间   | 峰高        | 峰面积       | 浓度      | 拖尾因子 | 理论塔板  |
|----|-----|--------|-----------|-----------|---------|------|-------|
| 1  |     | 6.682  | 1823      | 15275.2   | 0.3972  | 1.20 | 12674 |
| 2  |     | 7.568  | 325166    | 3830607.7 | 99.6028 | 1.13 | 8226  |
| Σ: |     | 326989 | 3845882.9 | 100.0000  |         |      |       |

| Sample | RetTime (min) | Hight | Area | Area (%) | Tailing factor | Theoretical plates (N) |
|--------|---------------|-------|------|----------|----------------|------------------------|
|--------|---------------|-------|------|----------|----------------|------------------------|

(*S*)-2-((3-chlorophenyl)(hydroxy)methyl)cyclohex-2-enone **3e**.<sup>[6]</sup>  $[\alpha]_D^{20} +10.7$  (*c* 1.1, CH<sub>2</sub>Cl<sub>2</sub>) for 48 % ee. <sup>1</sup>H NMR (400 MHz, CDCl<sub>3</sub>, TMS):  $\delta$  1.98-2.03 (m, 2H),

2.39-2.47 (m, 4H), 3.54 (br s, 1H), 5.51 (s, 1H), 6.77 (t,  $J = 4.0$  Hz, 1H), 7.22-7.27 (m, 3H), 7.35 (s, 1H). Chiralcel OJ, hexane/*i*-PrOH = 90/10, 0.8 mL/min, 230 nm,  $t_{major} = 19.25$  min,  $t_{minor} = 17.38$  min.

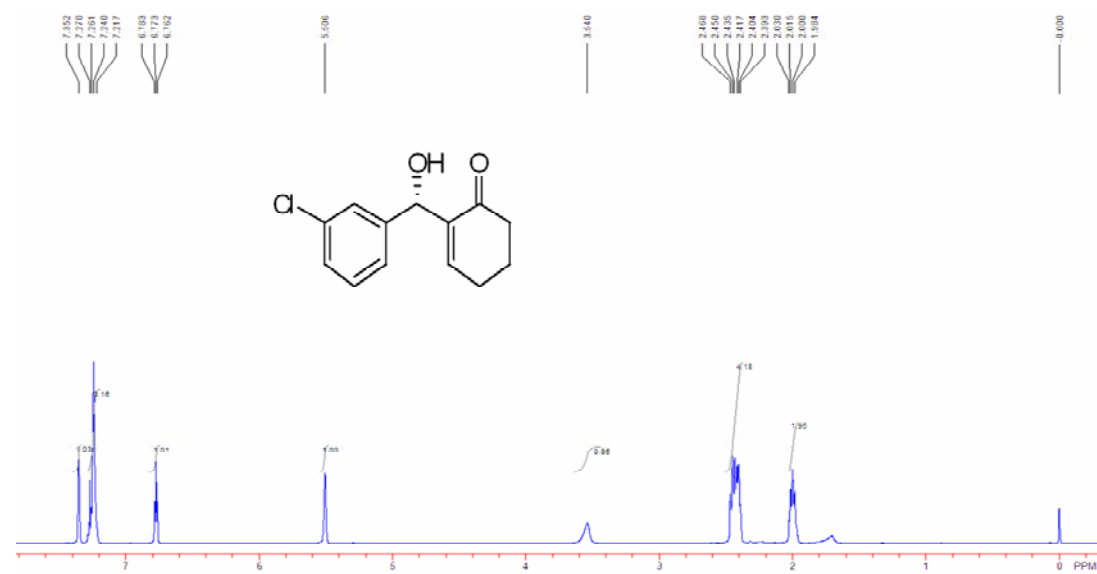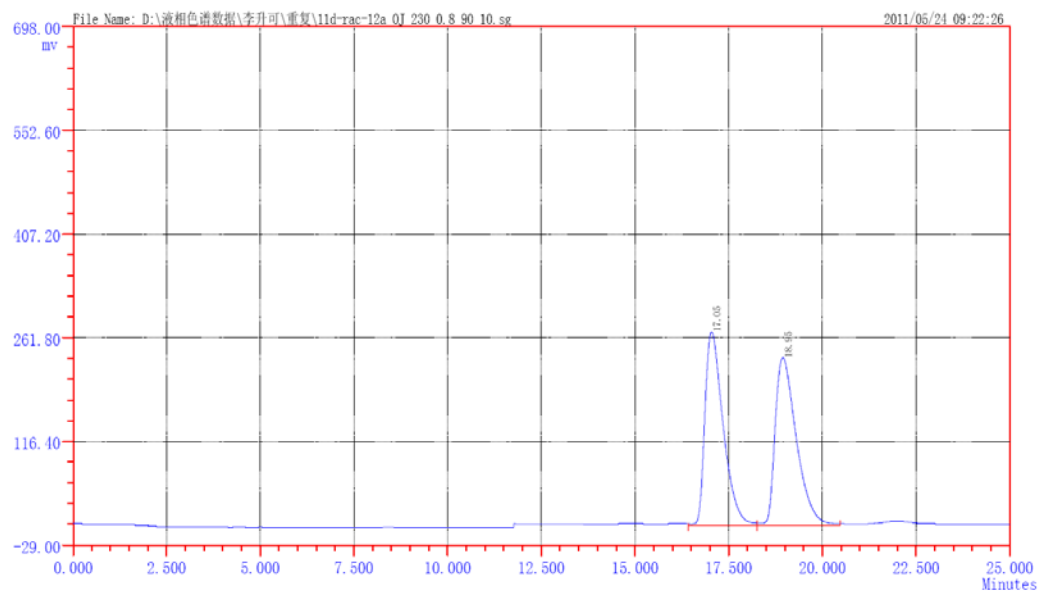

| ID | 组分名    | 保留时间          | 峰高     | 峰面积        | 浓度       | 拖尾因子           | 理论塔板                   |
|----|--------|---------------|--------|------------|----------|----------------|------------------------|
| 1  |        | 17.050        | 271288 | 9204496.3  | 49.7579  | 1.64           | 5033                   |
| 2  |        | 18.950        | 235320 | 9294057.7  | 50.2421  | 1.68           | 4588                   |
| Σ： |        |               | 506608 | 18498554.0 | 100.0000 |                |                        |
|    | Sample | RetTime (min) | Hight  | Area       | Area (%) | Tailing factor | Theoretical plates (N) |

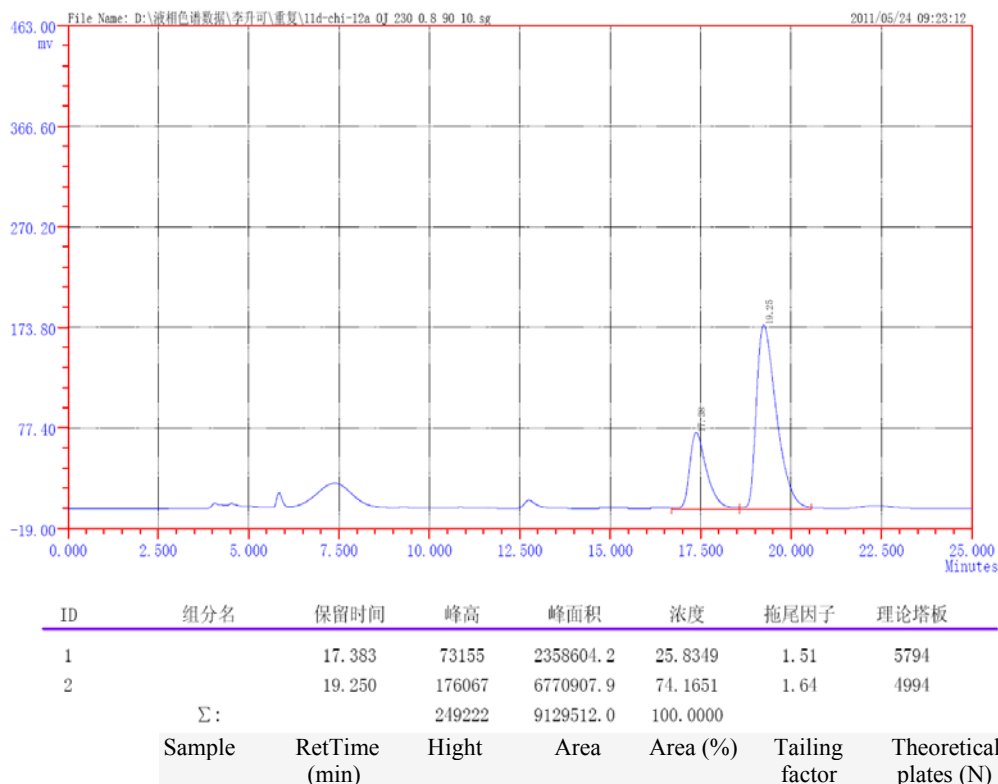

(*R,E*)-2-(2-chlorobenzylidene)-3-phenylcyclohexanone **5fa** (Fig. 2, entry 13):  $[\alpha]_D^{20} +78.8$  (*c* 0.10,  $\text{CHCl}_3$ ) for 98 % ee.  $^1\text{H}$  NMR (400 MHz,  $\text{CDCl}_3$ , TMS):  $\delta$  1.71-1.75 (m, 2H), 2.09-2.10 (m, 2H), 2.46-2.55 (m, 1H), 2.68-2.72 (m, 1H), 4.32 (br s, 1H), 6.85 (d,  $J = 7.6$  Hz, 1H), 7.01 (t,  $J = 7.6$  Hz, 1H), 7.14-7.25 (m, 4H), 7.32-7.39 (m, 3H), 7.61 (s, 1H).  $^{13}\text{C}$  NMR (100 MHz,  $\text{CDCl}_3$ , TMS):  $\delta$  18.9, 32.2, 40.7, 43.4, 126.2, 126.5, 127.7, 128.8, 129.5, 129.7, 130.1, 133.2, 133.6, 134.9, 141.1, 143.9, 203.2. MS (EI)  $m/z$  (%): 297.1 (M+H, 100); HRMS (Micromass LCT) Calcd. for  $\text{C}_{19}\text{H}_{17}\text{ClO}$ : 296.0968; Found: 296.0981. Chiralcel OD, hexane/*i*-PrOH = 90/10, 0.8 mL/min, 254 nm,  $t_{\text{major}} = 8.53$  min,  $t_{\text{minor}} = 9.42$  min.

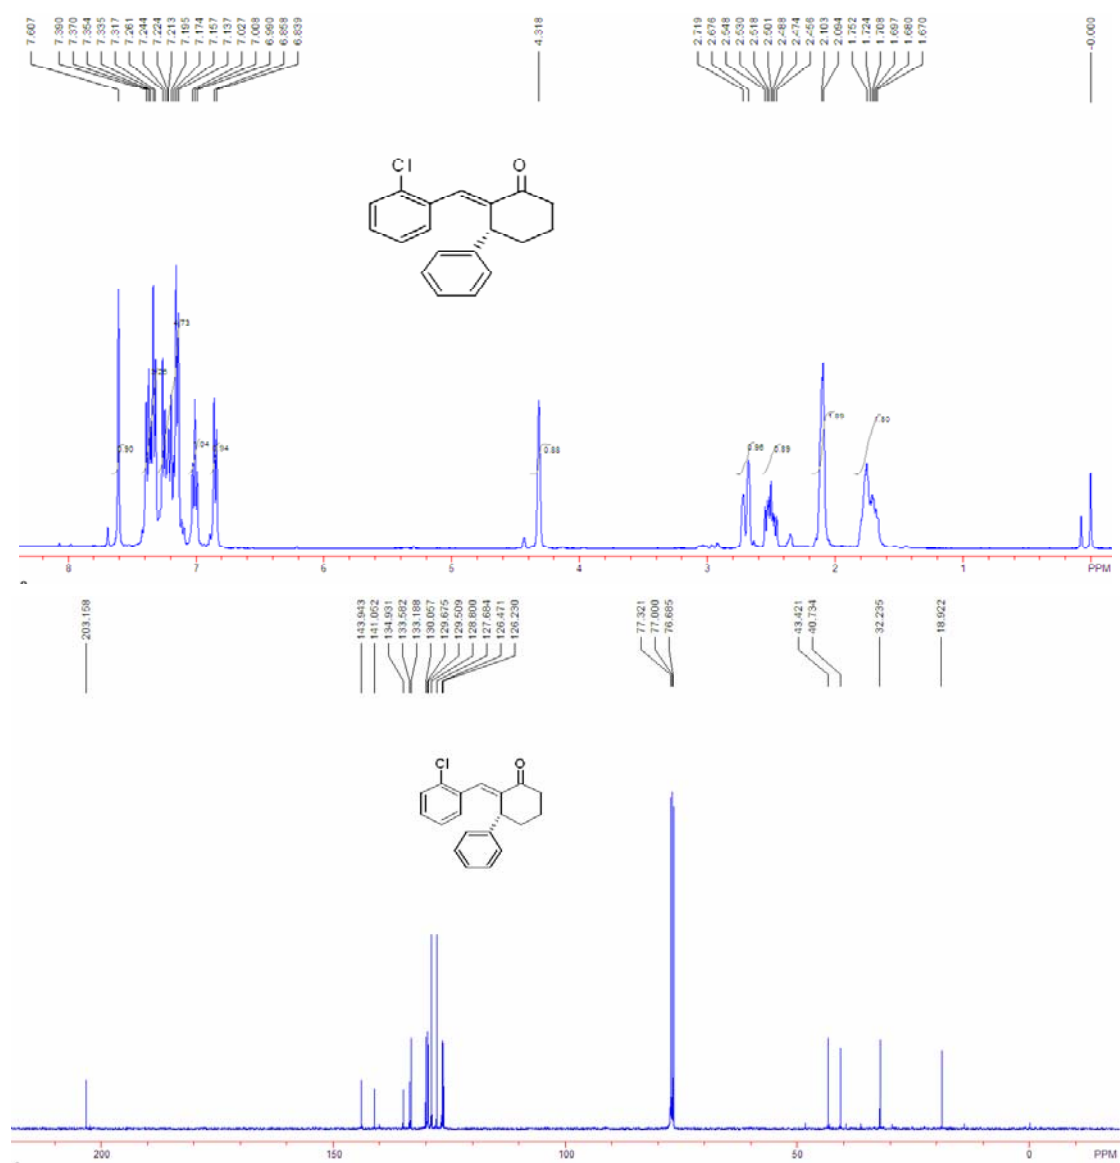

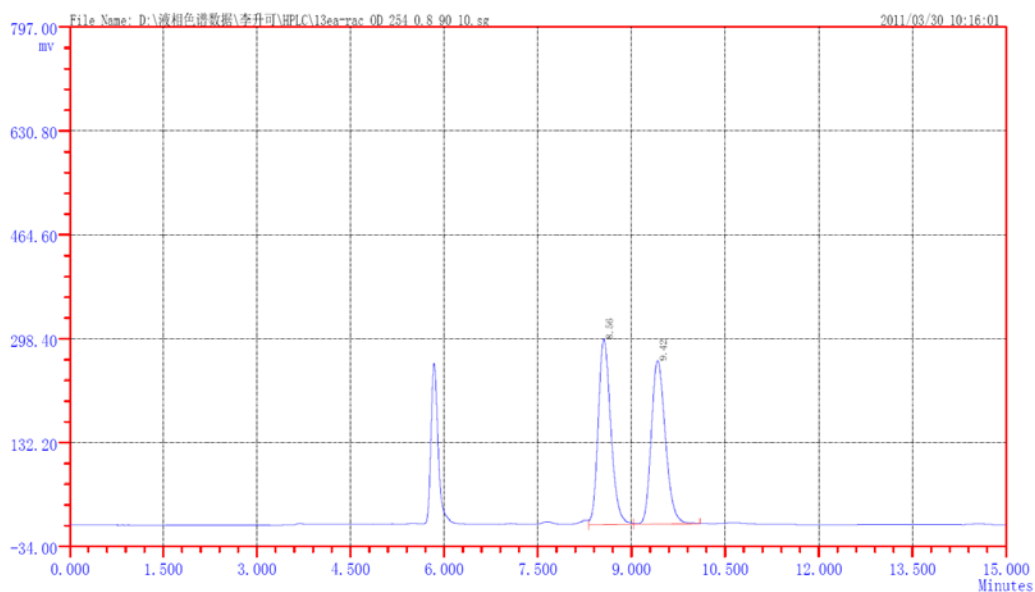

| ID | 组分名 | 保留时间   | 峰高        | 峰面积       | 浓度      | 拖尾因子 | 理论塔板 |
|----|-----|--------|-----------|-----------|---------|------|------|
| 1  |     | 8.558  | 296880    | 4173280.4 | 50.2074 | 1.22 | 7388 |
| 2  |     | 9.422  | 261930    | 4138801.6 | 49.7926 | 1.23 | 7086 |
| Σ: |     | 558810 | 8312082.0 | 100.0000  |         |      |      |

| Sample | RetTime (min) | Hight | Area | Area (%) | Tailing factor | Theoretical plates (N) |
|--------|---------------|-------|------|----------|----------------|------------------------|
|--------|---------------|-------|------|----------|----------------|------------------------|

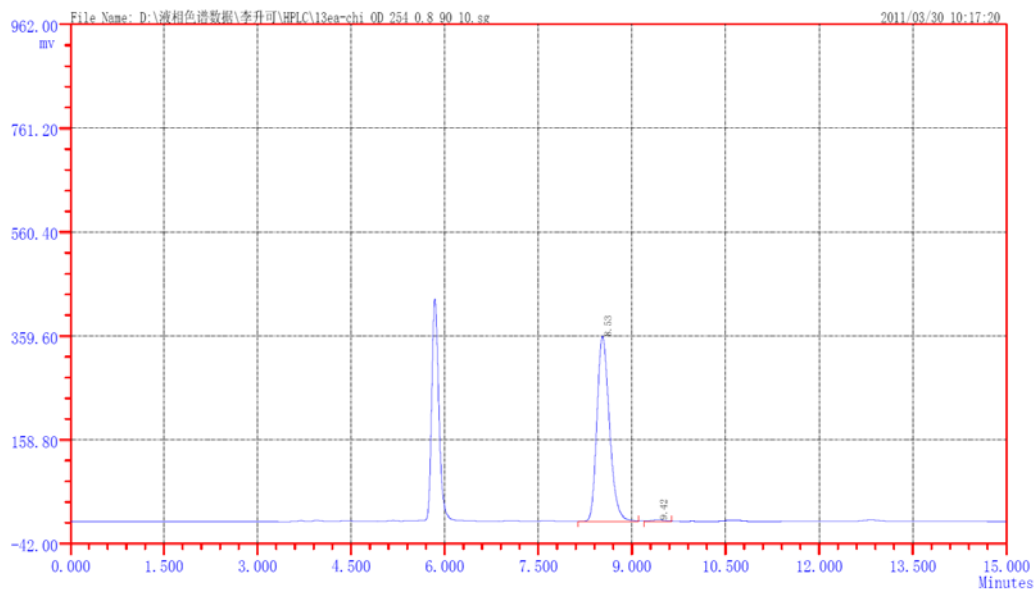

| ID | 组分名 | 保留时间   | 峰高        | 峰面积       | 浓度      | 拖尾因子 | 理论塔板 |
|----|-----|--------|-----------|-----------|---------|------|------|
| 1  |     | 8.528  | 357172    | 5002151.2 | 99.0600 | 1.25 | 7391 |
| 2  |     | 9.422  | 2953      | 47467.6   | 0.9400  | 0.97 | 6847 |
| Σ: |     | 360125 | 5049618.8 | 100.0000  |         |      |      |

| Sample | RetTime (min) | Hight | Area | Area (%) | Tailing factor | Theoretical plates (N) |
|--------|---------------|-------|------|----------|----------------|------------------------|
|--------|---------------|-------|------|----------|----------------|------------------------|

(*R*)-2-((2-chlorophenyl)(hydroxy)methyl)cyclohex-2-enone **3f**.<sup>[4]</sup>  $[\alpha]_D^{20}$  -5.6 (*c* 1.0, CH<sub>2</sub>Cl<sub>2</sub>) for 30 % ee. <sup>1</sup>H NMR (400 MHz, CDCl<sub>3</sub>, TMS):  $\delta$  1.97-2.04 (m, 2H),

2.33-2.38 (m, 2H), 2.48-2.52 (m, 2H), 3.71 (br s, 1H), 5.95 (s, 1H), 6.48 (t,  $J = 4.0$  Hz, 1H), 7.22-7.26 (m, 1H), 7.30-7.35 (m, 2H), 7.62 (dd,  $J = 1.6, 7.6$  Hz, 1H). Chiralcel OD, hexane/*i*-PrOH = 90/10, 0.8 mL/min, 230 nm,  $t_{major} = 17.92$  min,  $t_{minor} = 16.05$  min.

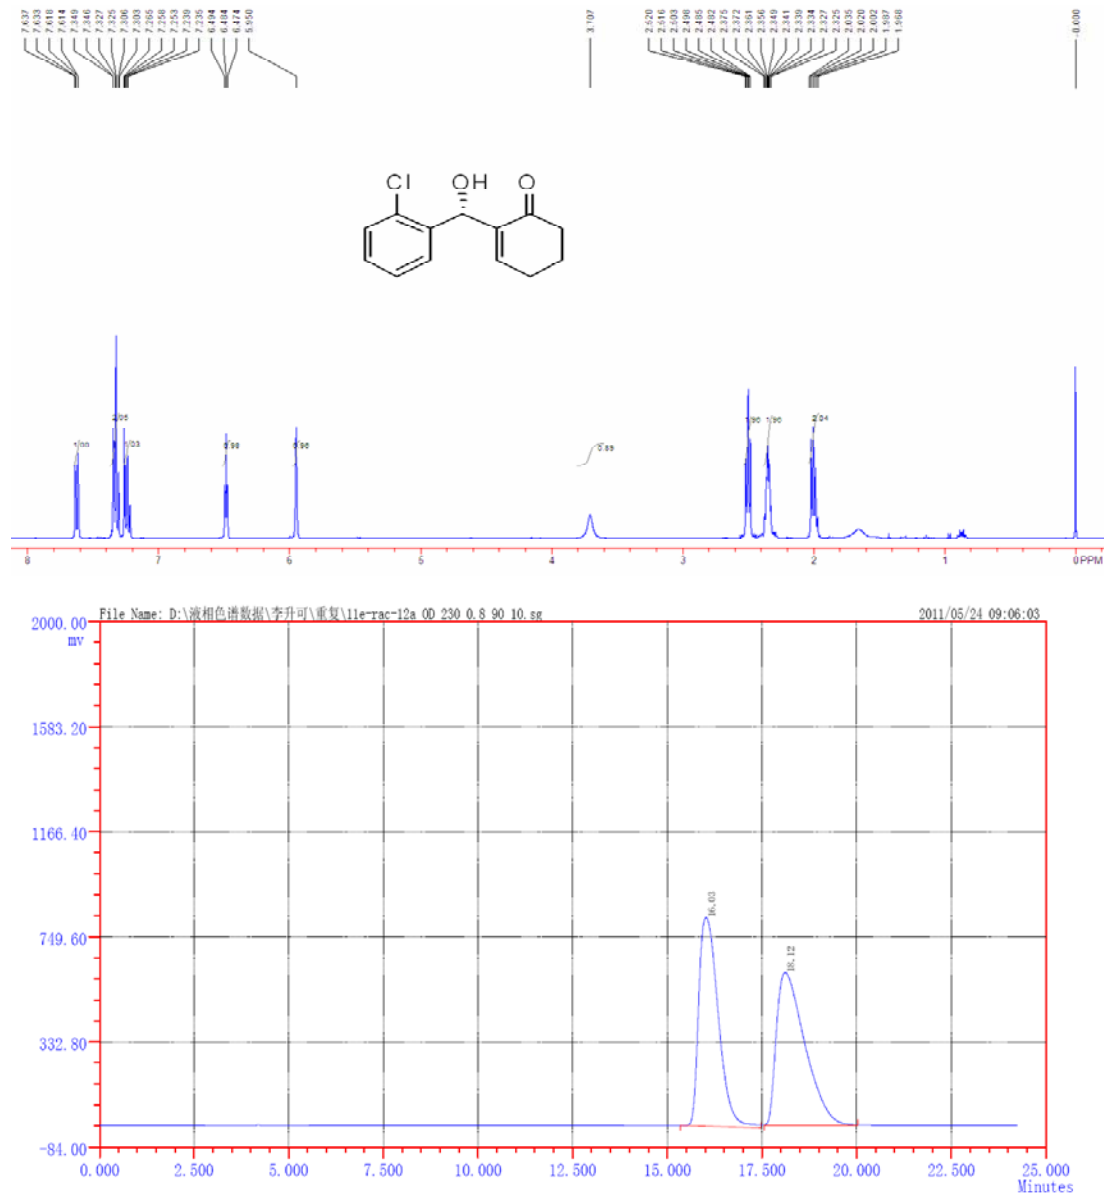

| ID     | 组分名           | 保留时间   | 峰高      | 峰面积        | 浓度             | 拖尾因子                   | 理论塔板 |
|--------|---------------|--------|---------|------------|----------------|------------------------|------|
| 1      |               | 16.027 | 827840  | 29746850.7 | 48.5753        | 1.55                   | 3965 |
| 2      |               | 18.120 | 604042  | 31491788.8 | 51.4247        | 1.96                   | 2408 |
| Σ :    |               |        | 1431882 | 61238639.6 | 100.0000       |                        |      |
| Sample | RetTime (min) | Hight  | Area    | Area (%)   | Tailing factor | Theoretical plates (N) |      |



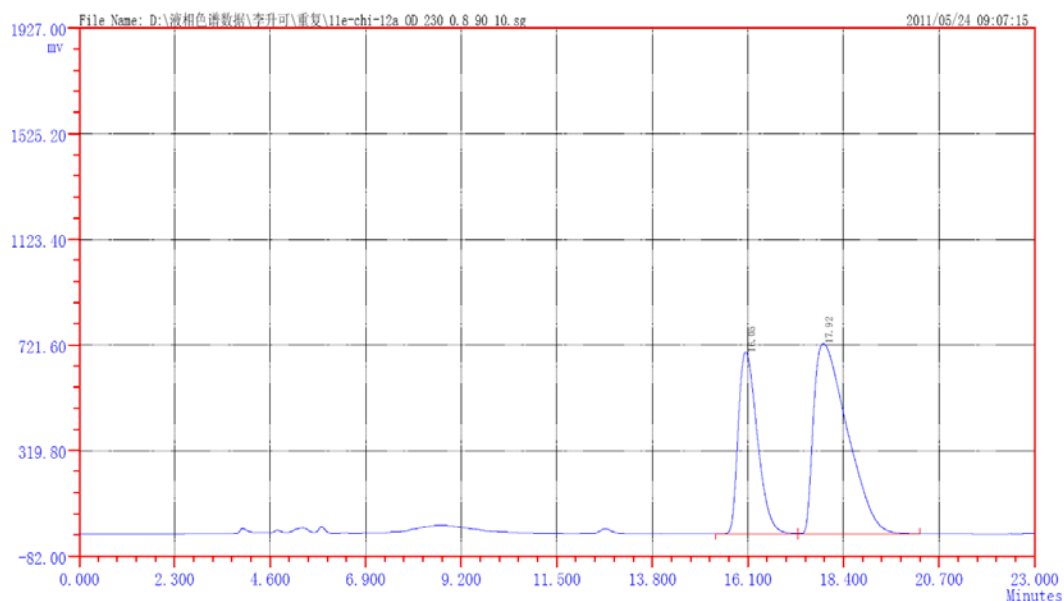

| ID  | 组分名    | 保留时间          | 峰高      | 峰面积        | 浓度       | 拖尾因子           | 理论塔板                   |
|-----|--------|---------------|---------|------------|----------|----------------|------------------------|
| 1   |        | 16.050        | 692624  | 22198577.7 | 35.2423  | 1.49           | 4998                   |
| 2   |        | 17.918        | 724719  | 40789941.8 | 64.7577  | 2.14           | 2020                   |
| Σ : |        |               | 1417343 | 62988519.5 | 100.0000 |                |                        |
|     | Sample | RetTime (min) | Hight   | Area       | Area (%) | Tailing factor | Theoretical plates (N) |

(*R,E*)-2-(2,4-dichlorobenzylidene)-3-phenylcyclohexanone **5ga** (Fig. 2, entry 14):  $[\alpha]_D^{20} +51.6$  (*c* 0.2, CHCl<sub>3</sub>) for 99 % ee. <sup>1</sup>H NMR (400 MHz, CDCl<sub>3</sub>, TMS):  $\delta$  1.67-1.77 (m, 2H), 2.09-2.12 (m, 2H), 2.45-2.55 (m, 1H), 2.68-2.73 (m, 1H), 4.26 (br s, 1H), 6.77 (d, *J* = 8.4 Hz, 1H), 7.00 (d, *J* = 8.4 Hz, 1H), 7.13 (d, *J* = 7.6 Hz, 2H), 7.23-7.27 (m, 1H), 7.34 (t, *J* = 7.6 Hz, 2H), 7.40 (s, 1H), 7.53 (s, 1H). <sup>13</sup>C NMR (100 MHz, CDCl<sub>3</sub>, TMS):  $\delta$  18.9, 32.3, 40.7, 43.6, 126.6, 127.6, 128.9, 129.4, 130.8, 132.10, 132.13, 134.9, 135.7, 141.5, 143.7, 202.8. MS (EI) *m/z* (%): 331.0 (M+H, 100); HRMS (Micromass LCT) Calcd. for C<sub>19</sub>H<sub>17</sub>Cl<sub>2</sub>O: 331.0656; Found: 331.0477. Chiralcel OJ, hexane/*i*-PrOH = 97/3, 0.8 mL/min, 230 nm, *t*<sub>major</sub> = 9.19 min, *t*<sub>minor</sub> = 12.78 min.

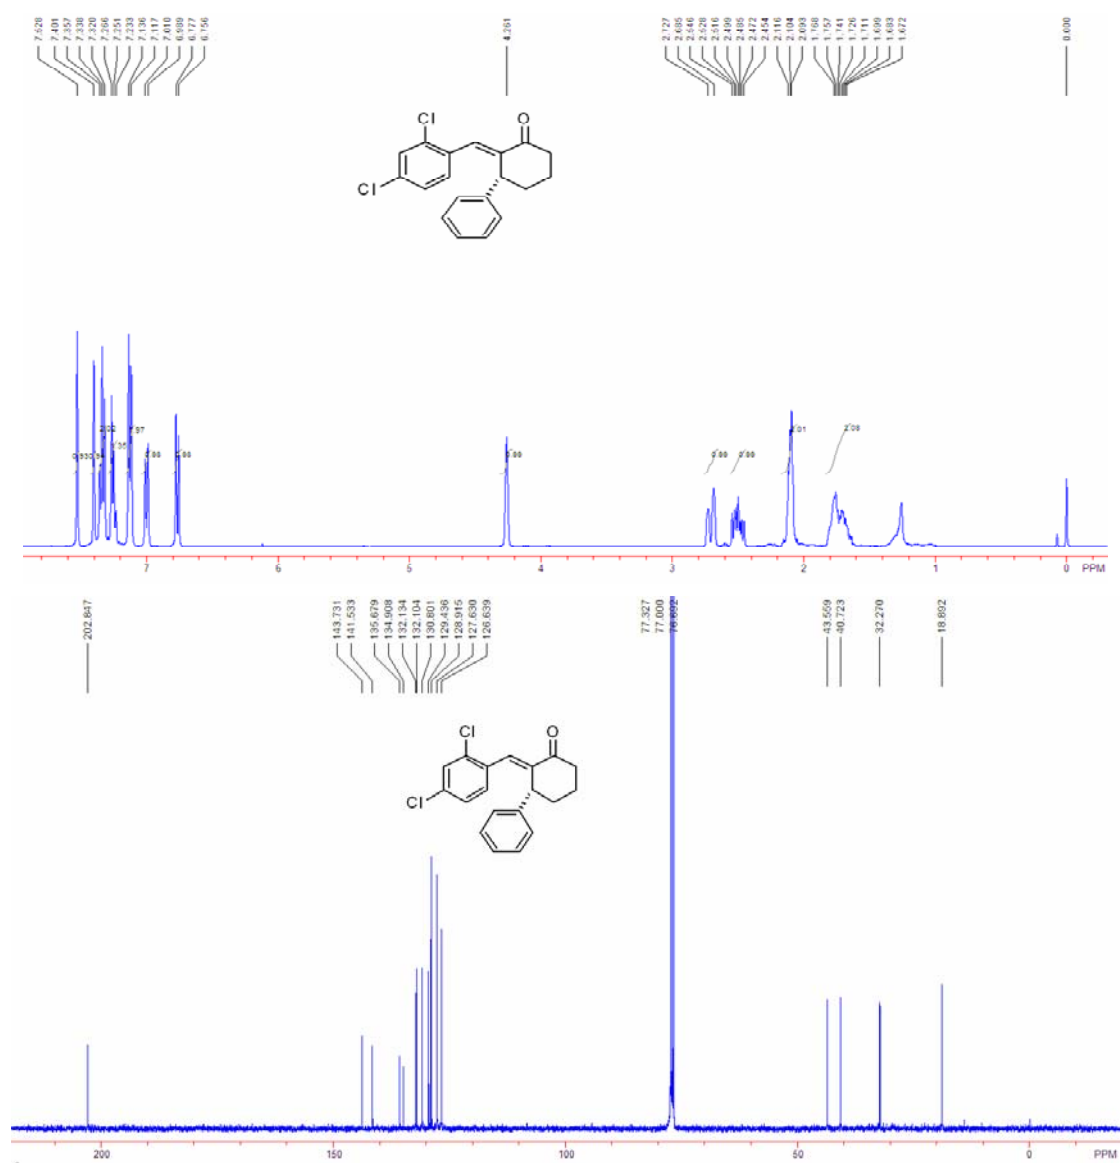

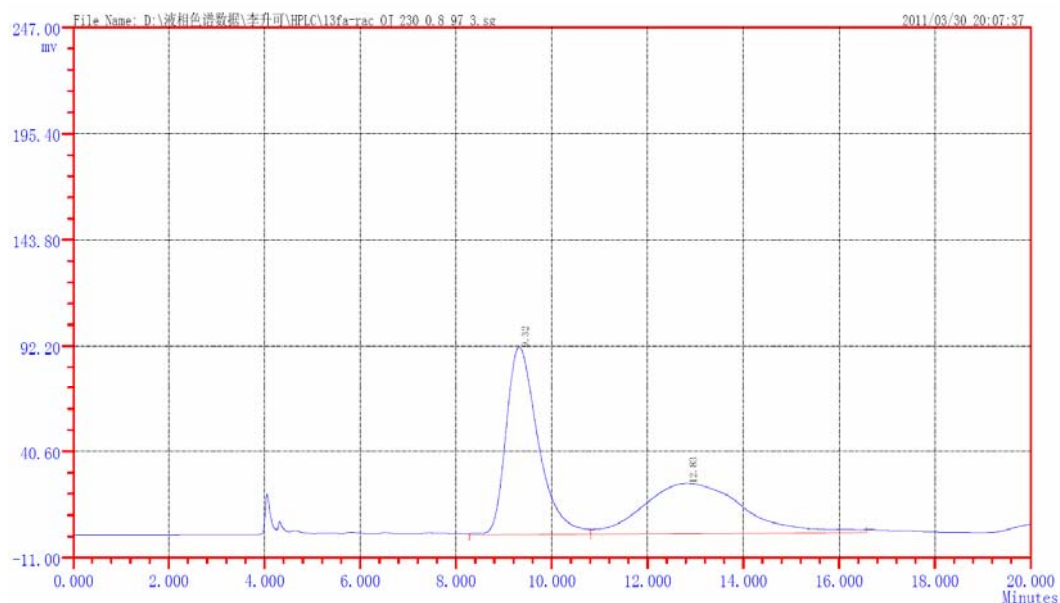

| ID | 组分名 | 保留时间   | 峰高    | 峰面积       | 浓度      | 拖尾因子 | 理论塔板 |
|----|-----|--------|-------|-----------|---------|------|------|
| 1  |     | 9.322  | 91493 | 4232072.6 | 50.0652 | 1.48 | 809  |
| 2  |     | 12.830 | 24352 | 4221043.0 | 49.9348 | 1.43 | 109  |

|        |               |        |           |          |                |                        |
|--------|---------------|--------|-----------|----------|----------------|------------------------|
| Σ:     |               | 115845 | 8453115.6 | 100.0000 |                |                        |
| Sample | RetTime (min) | Hight  | Area      | Area (%) | Tailing factor | Theoretical plates (N) |

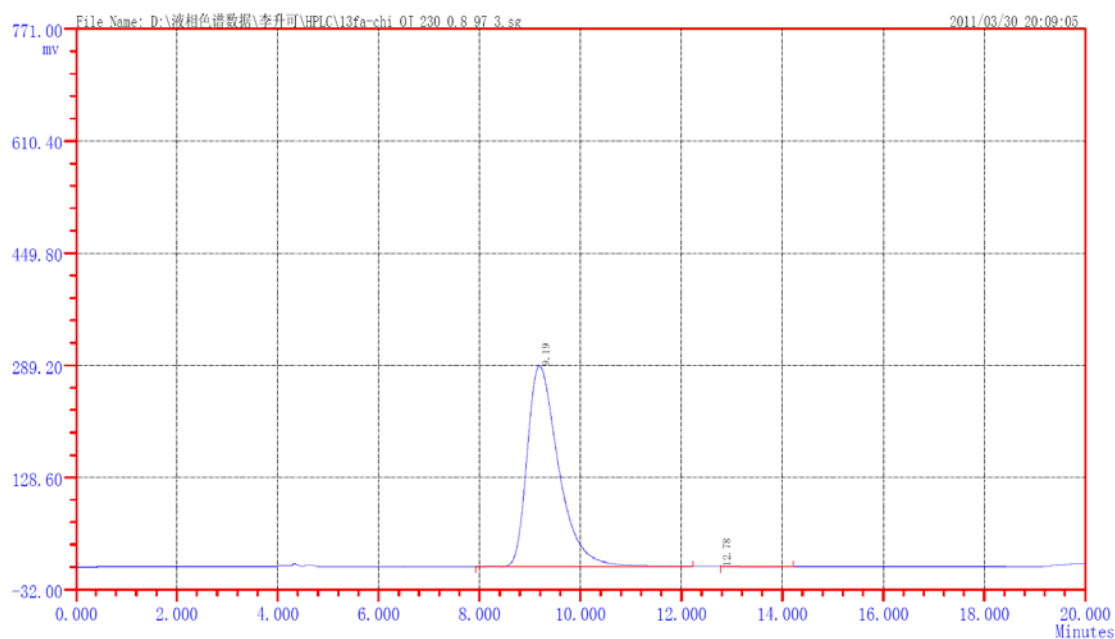

| ID | 组分名 | 保留时间   | 峰高     | 峰面积        | 浓度      | 拖尾因子   | 理论塔板 |
|----|-----|--------|--------|------------|---------|--------|------|
| 1  |     | 9.190  | 287787 | 12536771.6 | 99.5637 | 1.53   | 887  |
| 2  |     | 12.783 | 791    | 54935.6    | 0.4363  | 429.50 | 675  |

|        |               |        |            |          |                |                        |
|--------|---------------|--------|------------|----------|----------------|------------------------|
| Σ :    |               | 288578 | 12591707.1 | 100.0000 |                |                        |
| Sample | RetTime (min) | Hight  | Area       | Area (%) | Tailing factor | Theoretical plates (N) |

(*R*)-2-((2,4-dichlorophenyl)(hydroxy)methyl)cyclohex-2-enone **3g**.<sup>[6]</sup>  $[\alpha]_D^{20}$  -5.4 (*c* 1.0, CH<sub>2</sub>Cl<sub>2</sub>) for 34 % ee. <sup>1</sup>H NMR (400 MHz, CDCl<sub>3</sub>, TMS): δ 1.99-2.04 (m, 2H),

2.34-2.37 (m, 2H), 2.48-2.52 (m, 2H), 3.71 (br s, 1H), 5.88 (s, 1H), 6.49 (t,  $J = 4.0$  Hz, 1H), 7.31 (dd,  $J = 2.4, 8.8$  Hz, 1H), 7.36 (d,  $J = 2.4$  Hz, 1H), 7.57 (d,  $J = 8.8$  Hz, 1H).  
Chiralcel OD, hexane/*i*-PrOH = 90/10, 0.8 mL/min, 230 nm,  $t_{major} = 9.56$  min,  $t_{minor} = 12.02$  min.

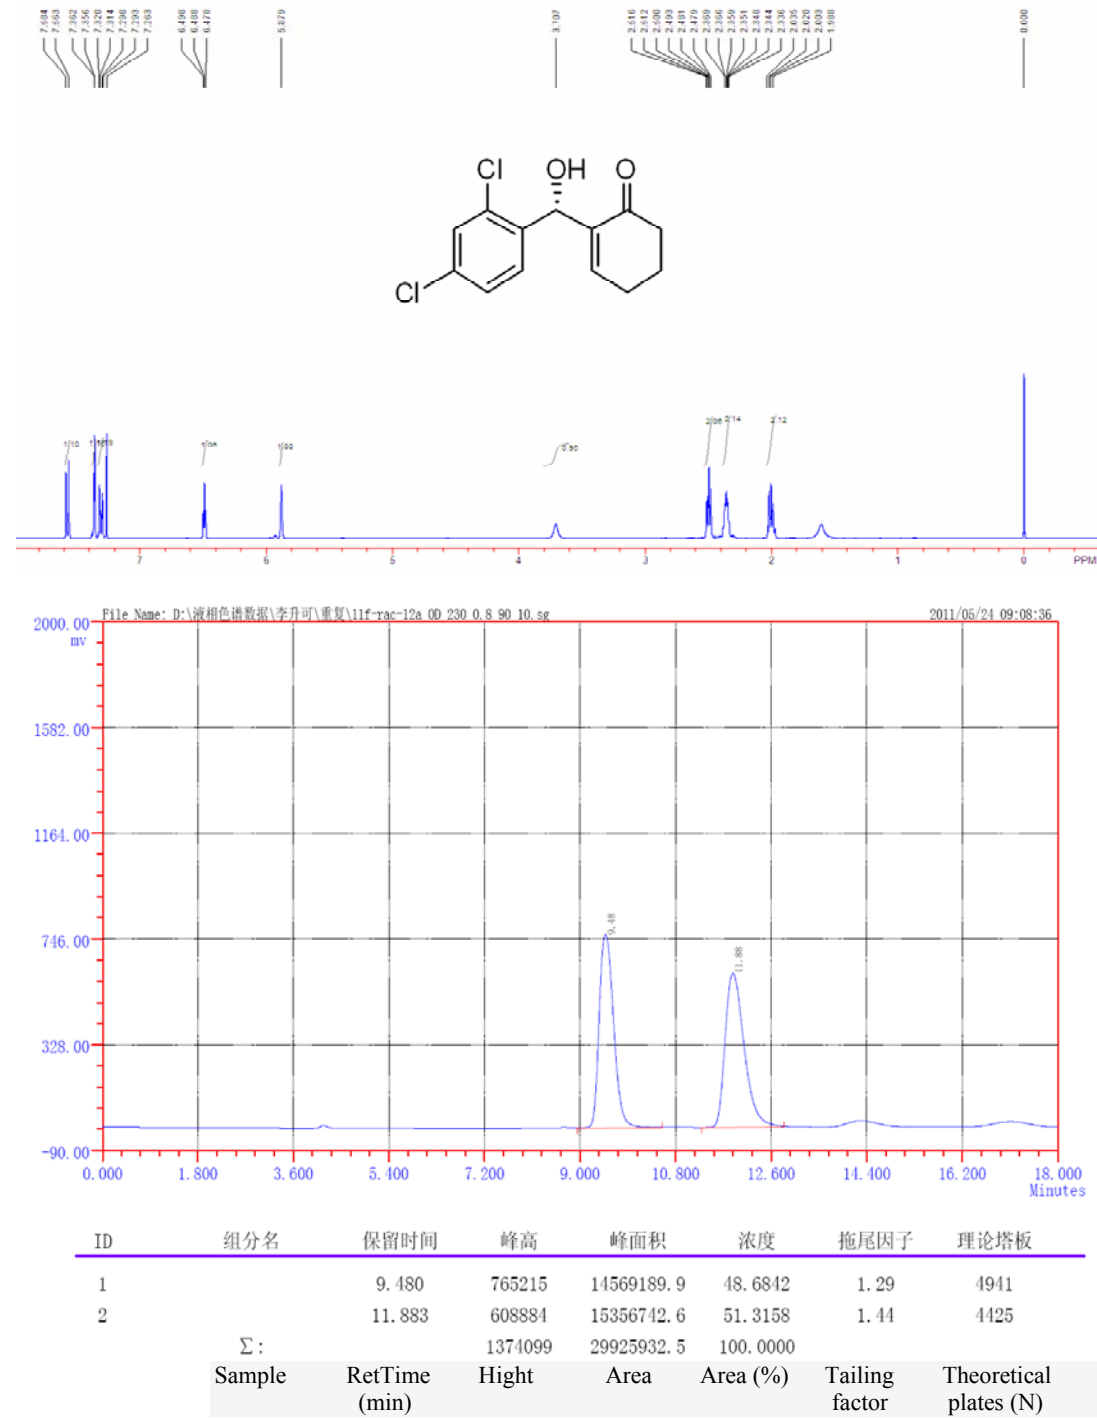

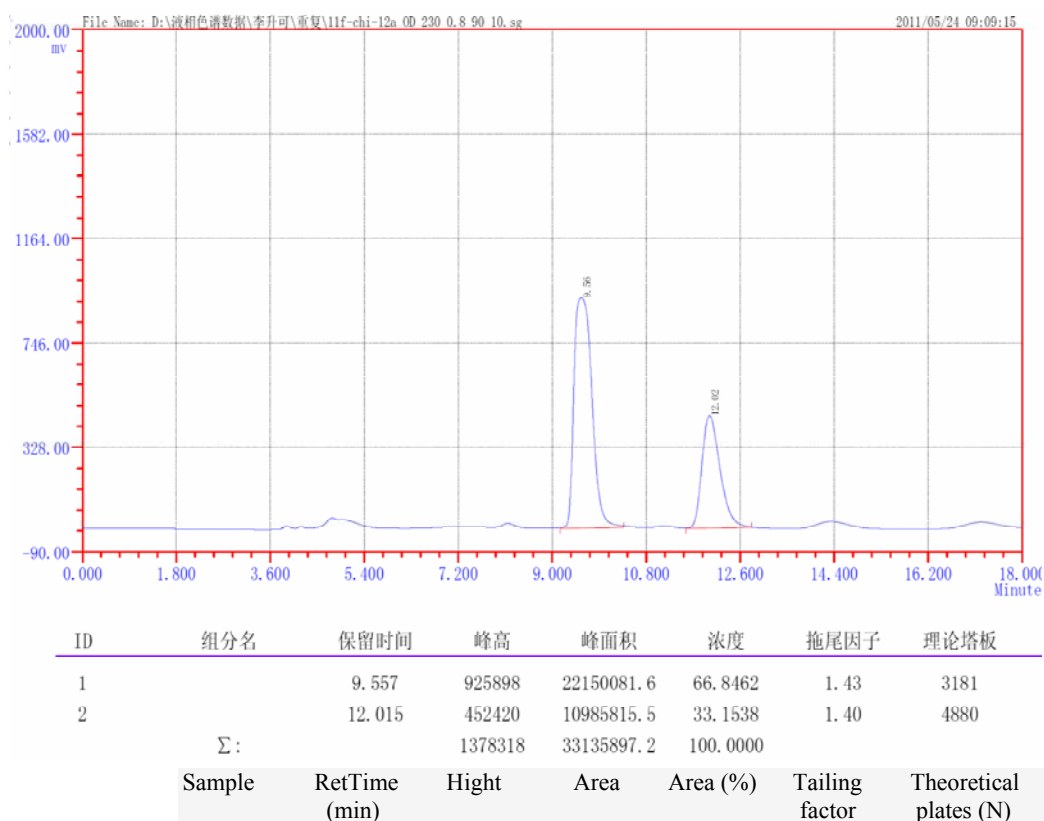

(*R,E*)-3-(4-chlorophenyl)-2-(4-nitrobenzylidene)cyclohexanone **5hf** (Fig. 2, entry 15): A pale yellow solid;  $[\alpha]_D^{20} +815.0$  (*c* 0.28, CHCl<sub>3</sub>) for 99 % ee. <sup>1</sup>H NMR (400 MHz, CDCl<sub>3</sub>, TMS):  $\delta$  1.66-1.84 (m, 2H), 2.09-2.14 (m, 2H), 2.44-2.53 (m, 1H), 2.68-2.75 (m, 1H), 4.38 (br s, 1H), 7.12 (d, *J* = 8.0 Hz, 2H), 7.26 (d, *J* = 8.4 Hz, 2H), 7.33-7.36 (m, 2H), 7.56 (s, 1H), 8.11-8.13 (m, 2H). <sup>13</sup>C NMR (100 MHz, CDCl<sub>3</sub>, TMS):  $\delta$  18.6, 32.1, 40.5, 43.0, 123.6, 129.0, 129.3, 130.4, 132.8, 134.4, 141.3, 141.7, 141.8, 147.4, 202.2. MS (EI) *m/z* (%): 342.1 (M+H, 100); HRMS (Micromass LCT) Calcd. for C<sub>19</sub>H<sub>17</sub>ClNO<sub>3</sub>: 342.0897; Found: 342.0900. Chiralcel AD, hexane/*i*-PrOH = 90/10, 0.8 mL/min, 254 nm, *t*<sub>major</sub> = 25.17 min, *t*<sub>minor</sub> = 20.41 min.

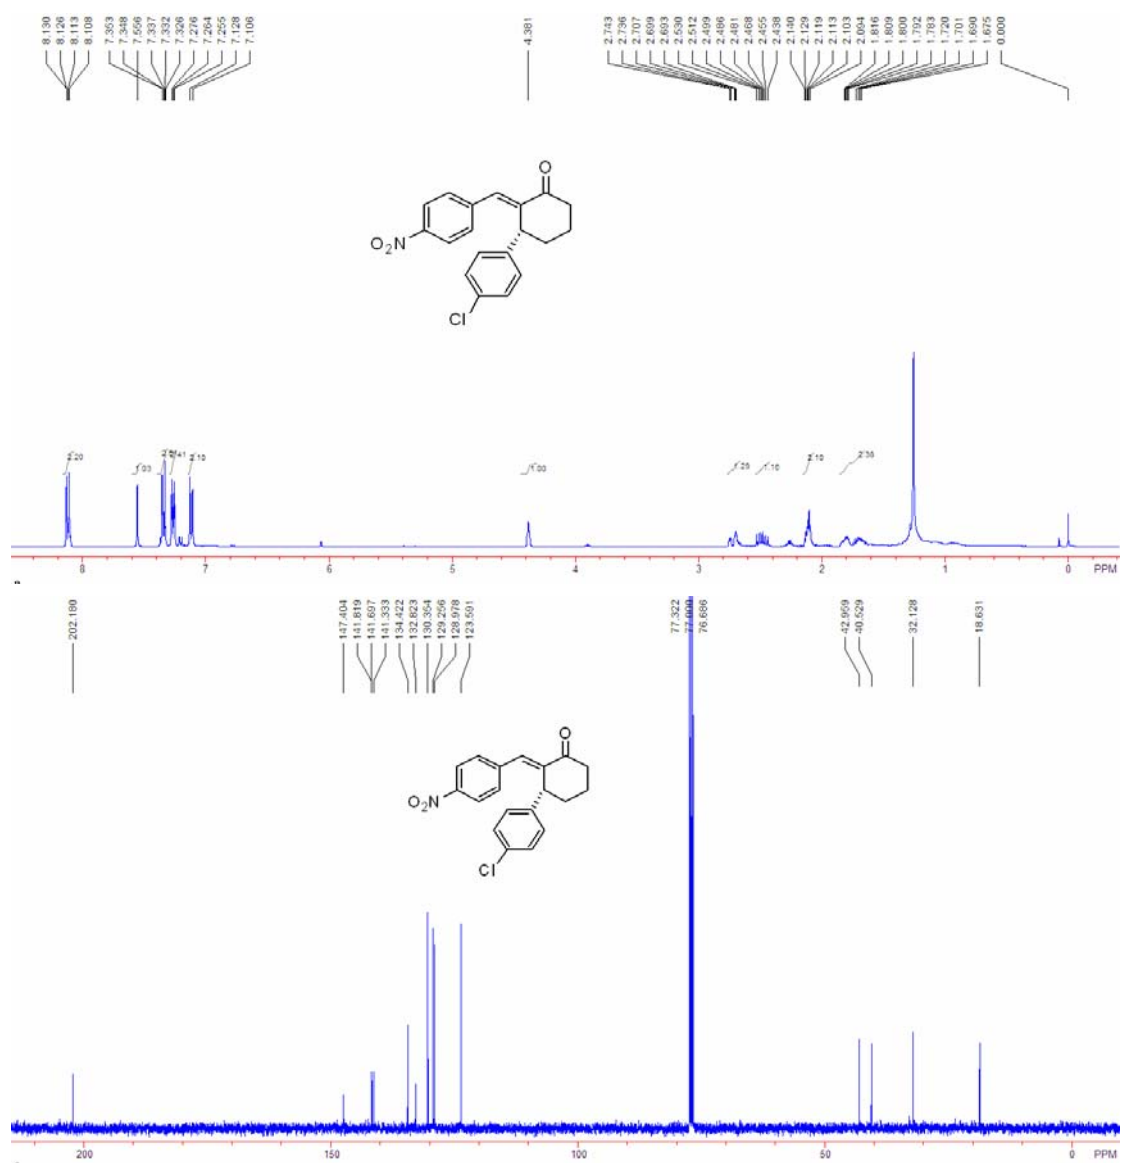

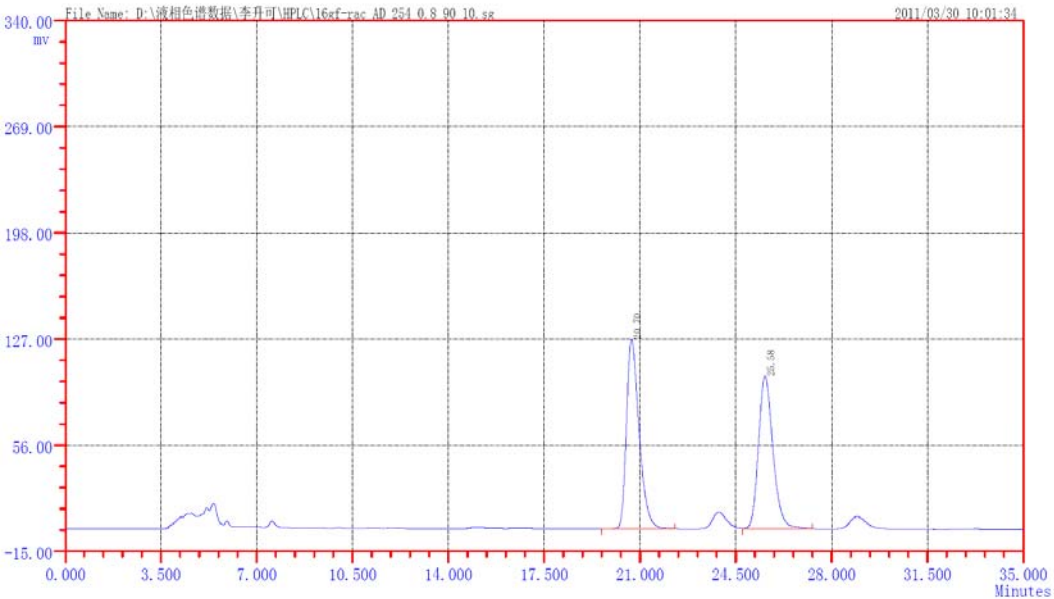

| ID | 组分名 | 保留时间   | 峰高     | 峰面积       | 浓度       | 拖尾因子 | 理论塔板 |
|----|-----|--------|--------|-----------|----------|------|------|
| 1  |     | 20.697 | 126848 | 4127749.3 | 52.0656  | 1.41 | 8062 |
| 2  |     | 25.575 | 102309 | 3800230.9 | 47.9344  | 1.21 | 9449 |
| Σ: |     |        | 229157 | 7927980.2 | 100.0000 |      |      |

| Sample | RetTime (min) | Hight | Area | Area (%) | Tailing factor | Theoretical plates (N) |
|--------|---------------|-------|------|----------|----------------|------------------------|
|--------|---------------|-------|------|----------|----------------|------------------------|

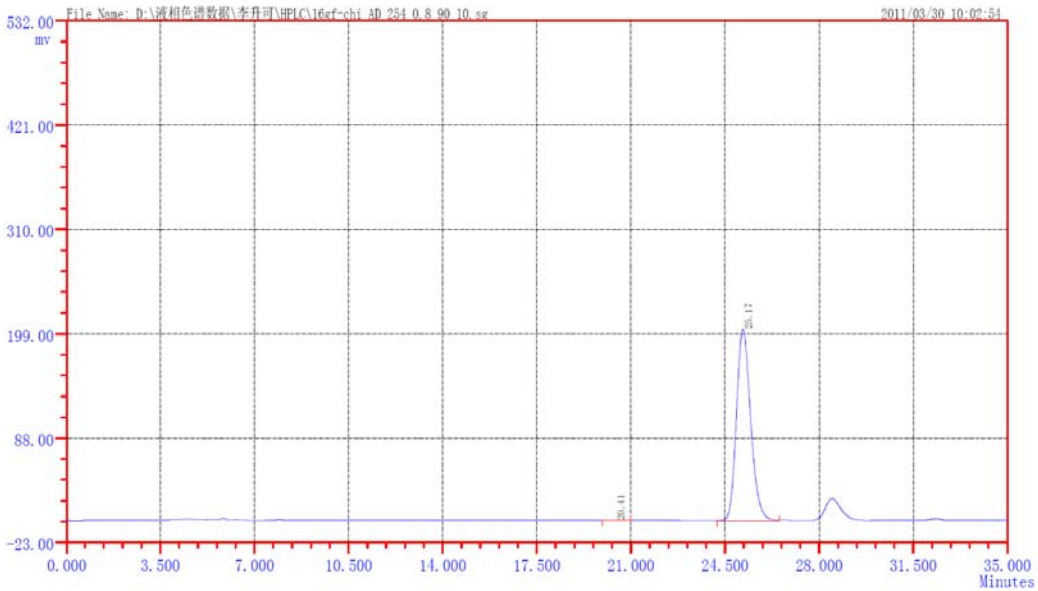

| ID | 组分名 | 保留时间   | 峰高     | 峰面积       | 浓度       | 拖尾因子 | 理论塔板 |
|----|-----|--------|--------|-----------|----------|------|------|
| 1  |     | 20.410 | 721    | 26288.3   | 0.3484   | 1.11 | 6245 |
| 2  |     | 25.172 | 204076 | 7518141.9 | 99.6516  | 1.20 | 9305 |
| Σ: |     |        | 204797 | 7544430.3 | 100.0000 |      |      |

| Sample | RetTime (min) | Hight | Area | Area (%) | Tailing factor | Theoretical plates (N) |
|--------|---------------|-------|------|----------|----------------|------------------------|
|--------|---------------|-------|------|----------|----------------|------------------------|

(*S*)-2-(hydroxy(4-nitrophenyl)methyl)cyclohex-2-enone **3h**.<sup>[8]</sup>  $[\alpha]_D^{20} +36.4$  (*c* 0.8, CH<sub>2</sub>Cl<sub>2</sub>) for 90 % ee. <sup>1</sup>H NMR (400 MHz, CDCl<sub>3</sub>, TMS):  $\delta$  1.98-2.05 (m, 2H), 2.42-2.48 (m, 4H), 3.58 (br s, 1H), 5.61 (s, 1H), 6.83 (t, *J* = 4.0 Hz, 1H), 7.55 (d, *J* = 8.4 Hz, 2H), 8.17-8.21 (m, 2H). Chiralcel AD, hexane/*i*-PrOH = 90/10, 0.8 mL/min, 230 nm, *t*<sub>major</sub> = 27.12 min, *t*<sub>minor</sub> = 30.36 min.

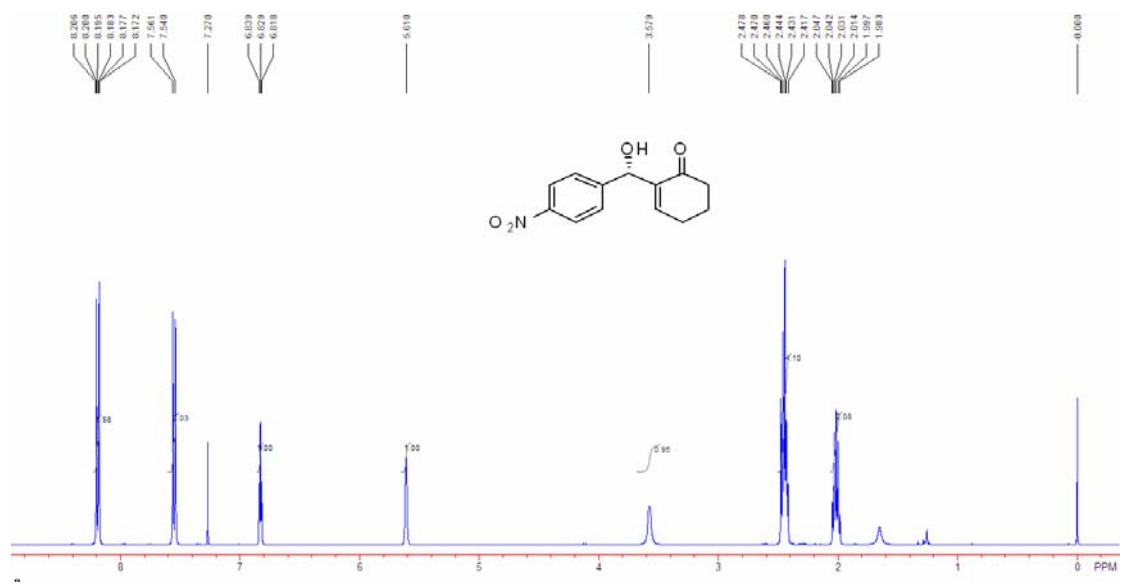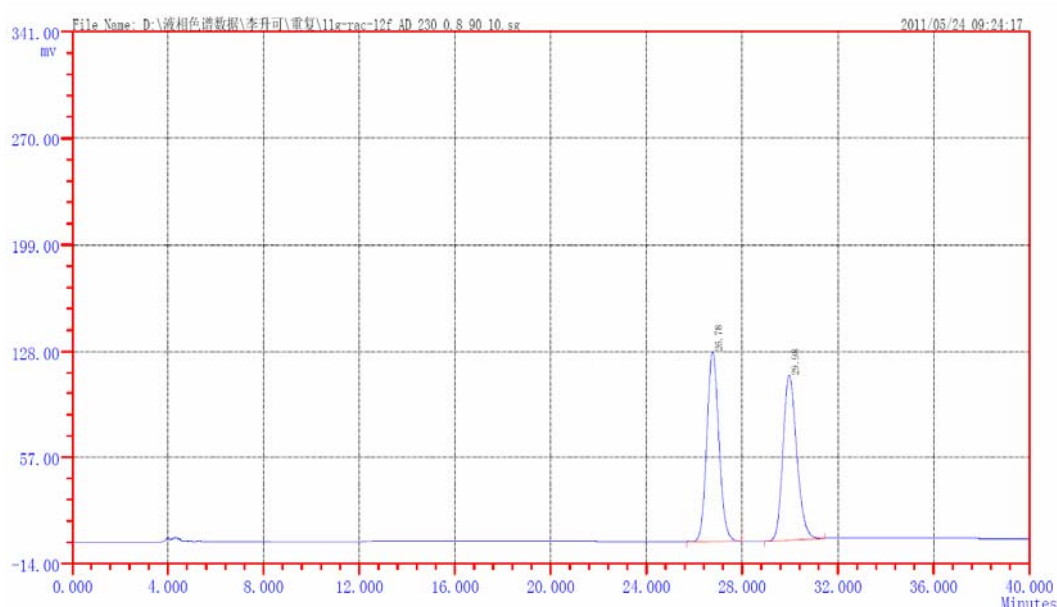

| ID | 组分名 | 保留时间   | 峰高     | 峰面积       | 浓度       | 拖尾因子 | 理论塔板  |
|----|-----|--------|--------|-----------|----------|------|-------|
| 1  |     | 26.775 | 127229 | 4453270.6 | 50.0751  | 1.10 | 11663 |
| 2  |     | 29.975 | 110635 | 4439913.9 | 49.9249  | 1.22 | 11119 |
| Σ: |     |        | 237864 | 8893184.5 | 100.0000 |      |       |

| Sample | RetTime (min) | Hight | Area | Area (%) | Tailing factor | Theoretical plates (N) |
|--------|---------------|-------|------|----------|----------------|------------------------|
|--------|---------------|-------|------|----------|----------------|------------------------|



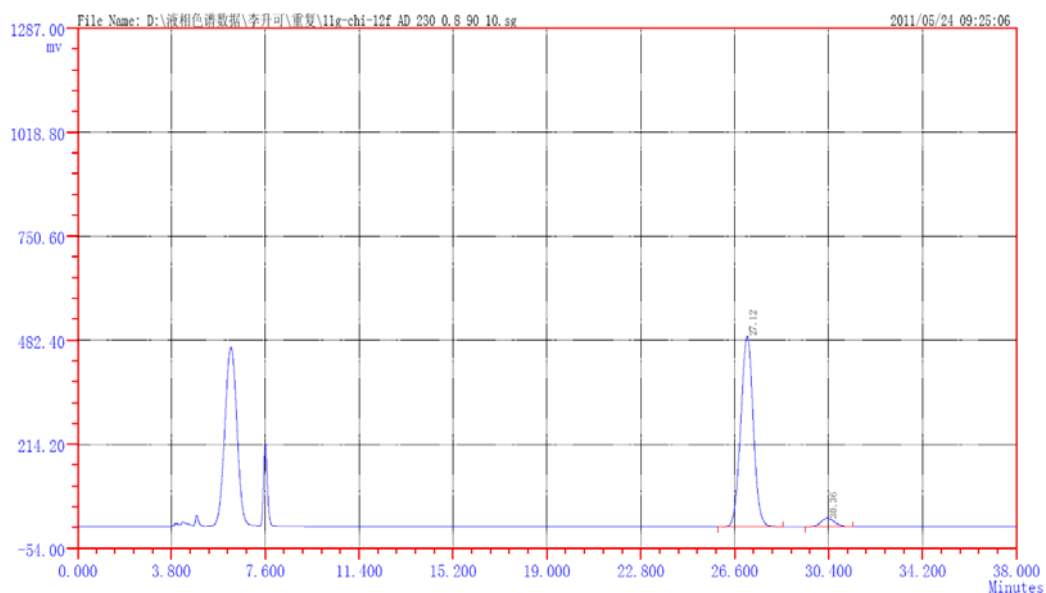

| ID         | 组分名 | 保留时间   | 峰高     | 峰面积        | 浓度       | 拖尾因子 | 理论塔板  |
|------------|-----|--------|--------|------------|----------|------|-------|
| 1          |     | 27.115 | 492370 | 17474677.6 | 94.9929  | 1.01 | 11633 |
| 2          |     | 30.357 | 22451  | 921099.6   | 5.0071   | 1.18 | 10912 |
| $\Sigma$ : |     |        | 514821 | 18395777.2 | 100.0000 |      |       |

| Sample | RetTime (min) | Hight | Area | Area (%) | Tailing factor | Theoretical plates (N) |
|--------|---------------|-------|------|----------|----------------|------------------------|
|--------|---------------|-------|------|----------|----------------|------------------------|

(*R,E*)-2-ethylidene-3-phenylcyclohexanone **5ia**<sup>[2]</sup> (Fig. 2, entry 16):  $[\alpha]_D^{20} +38.0$  (*c* 0.60, CHCl<sub>3</sub>) for 99 % ee. <sup>1</sup>H NMR (400 MHz, CDCl<sub>3</sub>, TMS):  $\delta$  1.58 (d, *J* = 6.8 Hz, 3H), 1.69-1.75 (m, 2H), 1.96-2.01 (m, 1H), 2.07-2.14 (m, 1H), 2.35-2.44 (m, 1H), 2.52-2.58 (m, 1H), 4.74 (br s, 1H), 6.95 (q, *J* = 7.2 Hz, 1H), 7.12 (d, *J* = 7.6 Hz, 2H), 7.19 (t, *J* = 7.2 Hz, 1H), 7.27 (d, *J* = 7.6 Hz, 2H). Chiralcel AD, hexane/*i*-PrOH = 90/10, 0.7 mL/min, 254 nm,  $t_{major}$  = 8.64 min,  $t_{minor}$  = 9.38 min.

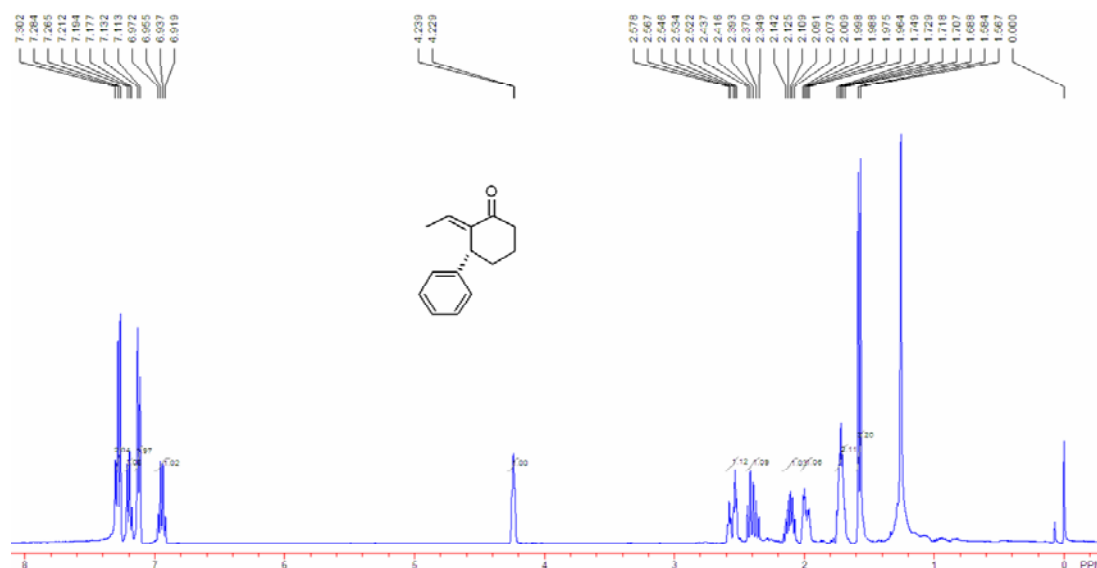

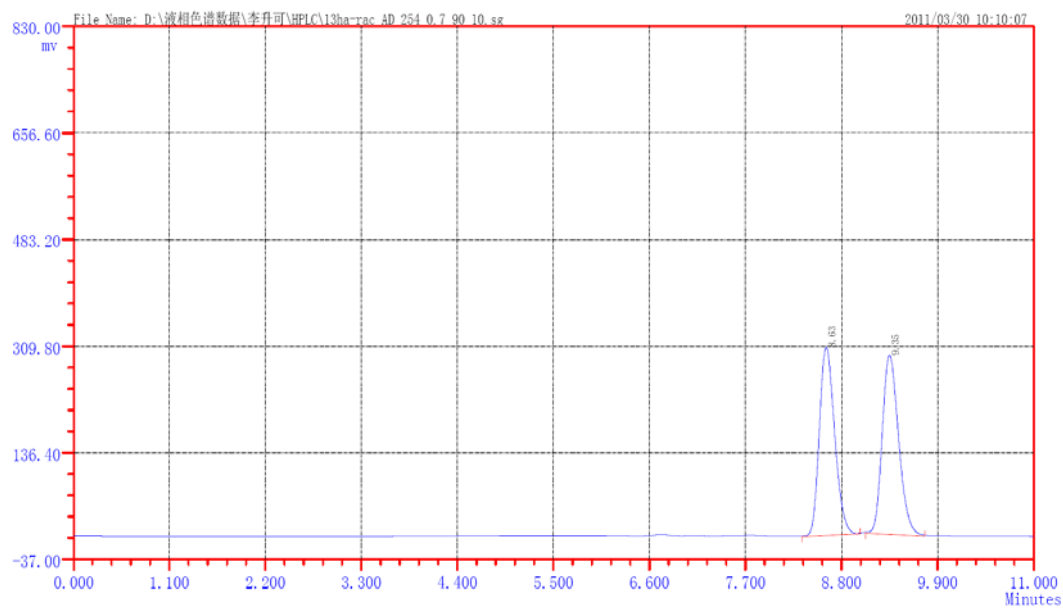

| ID | 组分名 | 保留时间  | 峰高     | 峰面积       | 浓度       | 拖尾因子 | 理论塔板  |
|----|-----|-------|--------|-----------|----------|------|-------|
| 1  |     | 8.627 | 306593 | 3743278.9 | 49.5520  | 1.24 | 9950  |
| 2  |     | 9.353 | 291601 | 3810961.6 | 50.4480  | 1.20 | 10209 |
| Σ: |     |       | 598194 | 7554240.6 | 100.0000 |      |       |

| Sample | RetTime (min) | Hight | Area | Area (%) | Tailing factor | Theoretical plates (N) |
|--------|---------------|-------|------|----------|----------------|------------------------|
|--------|---------------|-------|------|----------|----------------|------------------------|

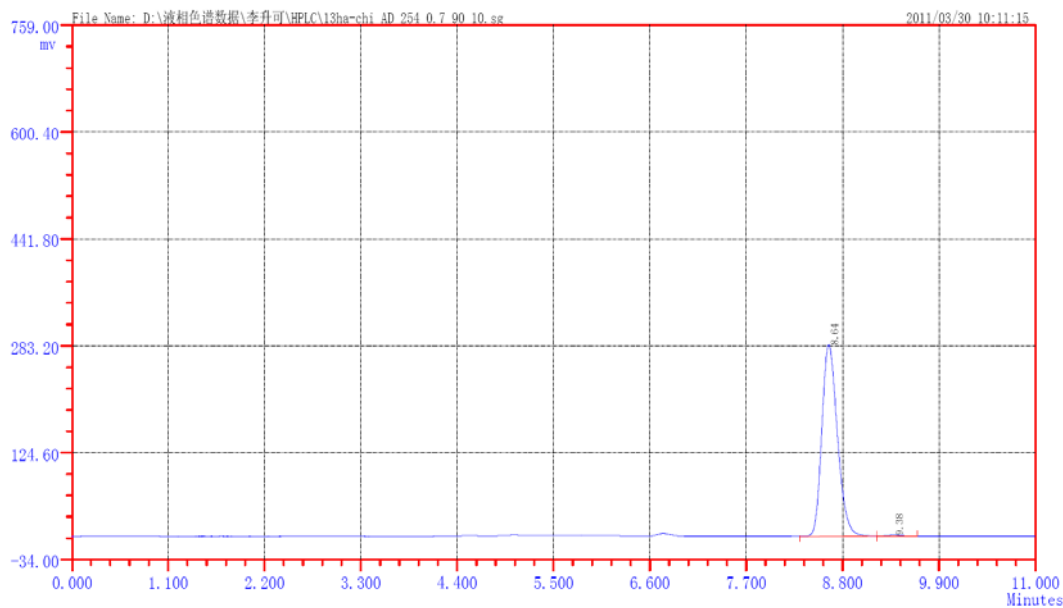

| ID | 组分名 | 保留时间  | 峰高     | 峰面积       | 浓度       | 拖尾因子 | 理论塔板  |
|----|-----|-------|--------|-----------|----------|------|-------|
| 1  |     | 8.643 | 284236 | 3517722.2 | 99.4232  | 1.25 | 9721  |
| 2  |     | 9.383 | 1556   | 20408.7   | 0.5768   | 1.21 | 10201 |
| Σ: |     |       | 285792 | 3538130.9 | 100.0000 |      |       |

| Sample | RetTime (min) | Hight | Area | Area (%) | Tailing factor | Theoretical plates (N) |
|--------|---------------|-------|------|----------|----------------|------------------------|
|--------|---------------|-------|------|----------|----------------|------------------------|

(*R*)-2-(1-hydroxyethyl)cyclohex-2-enone **3i**.<sup>[9]</sup>  $[\alpha]_D^{20} +0.7$  (*c* 0.6, CH<sub>2</sub>Cl<sub>2</sub>) for 91 % ee.  
<sup>1</sup>H NMR (400 MHz, CDCl<sub>3</sub>, TMS):  $\delta$  1.34 (d, *J* = 5.6 Hz, 3H), 1.97-2.03 (m, 2H), 2.39-2.47 (m, 4H), 2.76 (br s, 1H), 4.58 (dd, *J* = 6.4, 12.8 Hz, 1H), 6.93 (t, *J* = 4.0 Hz, 1H). Chiralcel AD, hexane/*i*-PrOH = 90/10, 0.8 mL/min, 230 nm,  $t_{major}$  = 13.30 min,  $t_{minor}$  = 11.43 min.

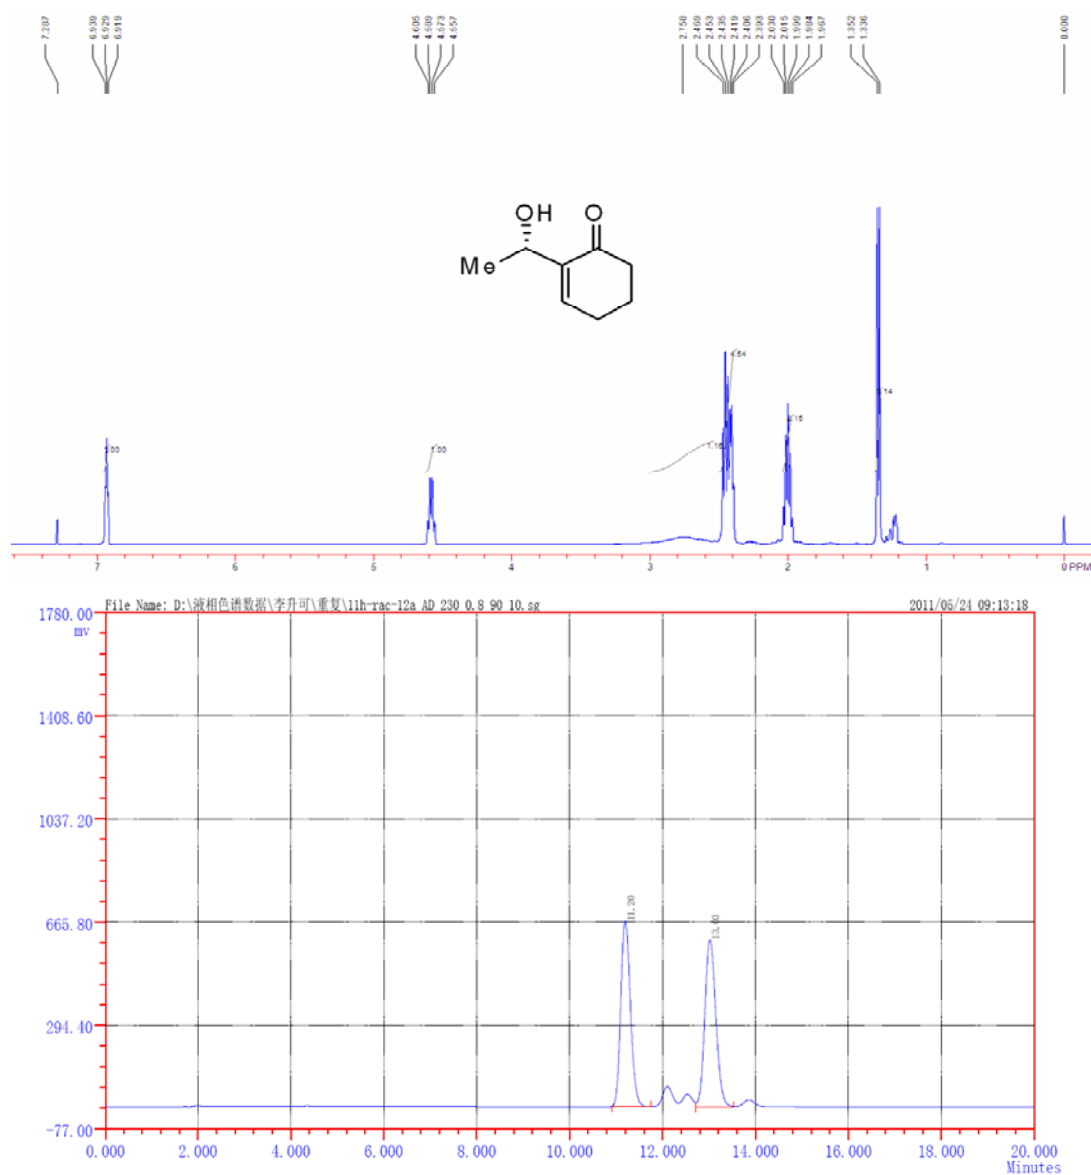

| ID         | 组分名 | 保留时间   | 峰高      | 峰面积        | 浓度       | 拖尾因子 | 理论塔板  |
|------------|-----|--------|---------|------------|----------|------|-------|
| 1          |     | 11.200 | 666318  | 9696383.1  | 49.2581  | 1.15 | 11806 |
| 2          |     | 13.025 | 601643  | 9988482.6  | 50.7419  | 1.12 | 12268 |
| $\Sigma$ : |     |        | 1267961 | 19684865.7 | 100.0000 |      |       |

| Sample | RetTime (min) | Hight | Area | Area (%) | Tailing factor | Theoretical plates (N) |
|--------|---------------|-------|------|----------|----------------|------------------------|
|--------|---------------|-------|------|----------|----------------|------------------------|

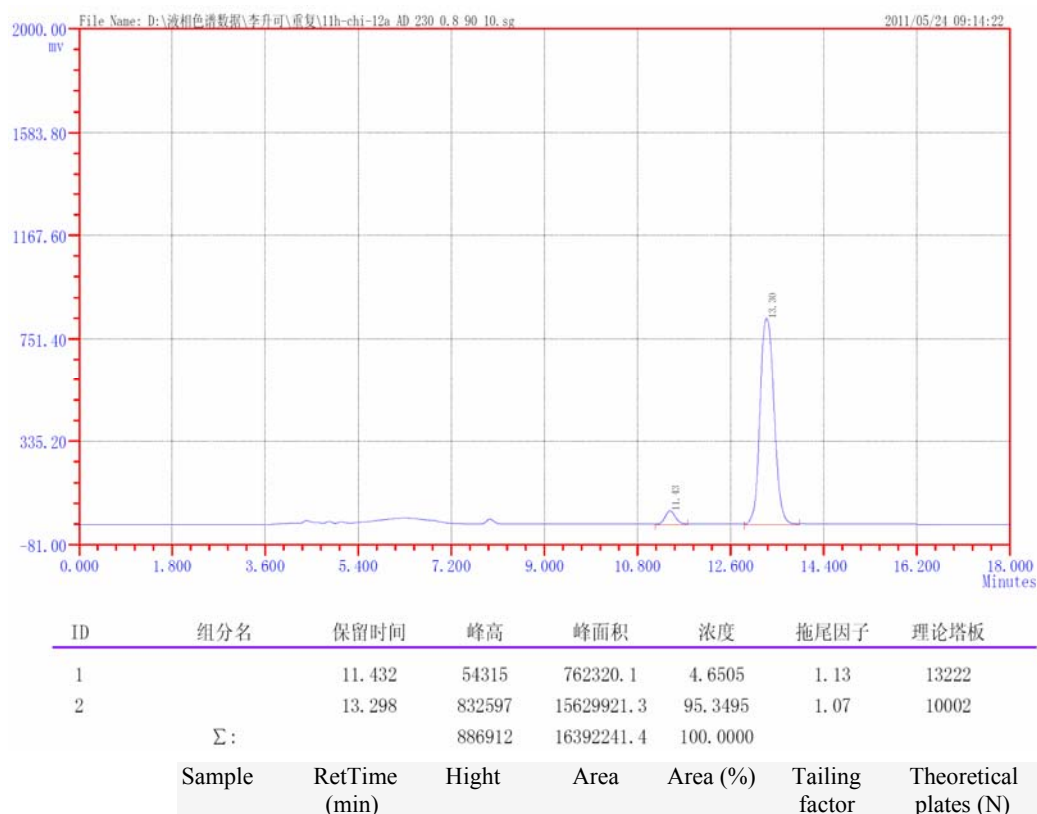

(*R,E*)-2-(cyclohexylmethylene)-3-phenylcyclohexanone **5ja** (Fig. 2, entry 17):  $[\alpha]_D^{20} +104.3$  (*c* 0.50, CHCl<sub>3</sub>) for 99 % ee. <sup>1</sup>H NMR (400 MHz, CDCl<sub>3</sub>, TMS): δ 0.86-0.99 (m, 3H), 1.08-1.23 (m, 4H), 1.50-1.61 (m, 2H), 1.68-1.73 (m, 3H), 1.99-2.13 (m, 3H), 2.34-2.43 (m, 1H), 2.51-2.58 (m, 1H), 4.27 (t, *J* = 4.8 Hz, 1H), 6.58 (dd, *J* = 0.8, 10.0 Hz, 1H), 7.13 (d, *J* = 7.2 Hz, 2H), 7.16-7.20 (m, 1H), 7.25-7.29 (m, 2H). <sup>13</sup>C NMR (100 MHz, CDCl<sub>3</sub>, TMS): δ 18.7, 25.3, 25.4, 25.7, 31.0, 32.0, 32.3, 37.1, 40.0, 41.8, 126.1, 127.7, 128.3, 136.6, 144.9, 146.9, 202.3. MS (EI) *m/z* (%): 268.2 (M+H, 100); HRMS (Micromass LCT) Calcd. for C<sub>19</sub>H<sub>24</sub>O: 268.1827; Found: 268.1838. Chiralcel AD, hexane/*i*-PrOH = 90/10, 0.5 mL/min, 254 nm, *t*<sub>major</sub> = 10.99 min, *t*<sub>minor</sub> = 9.19 min.

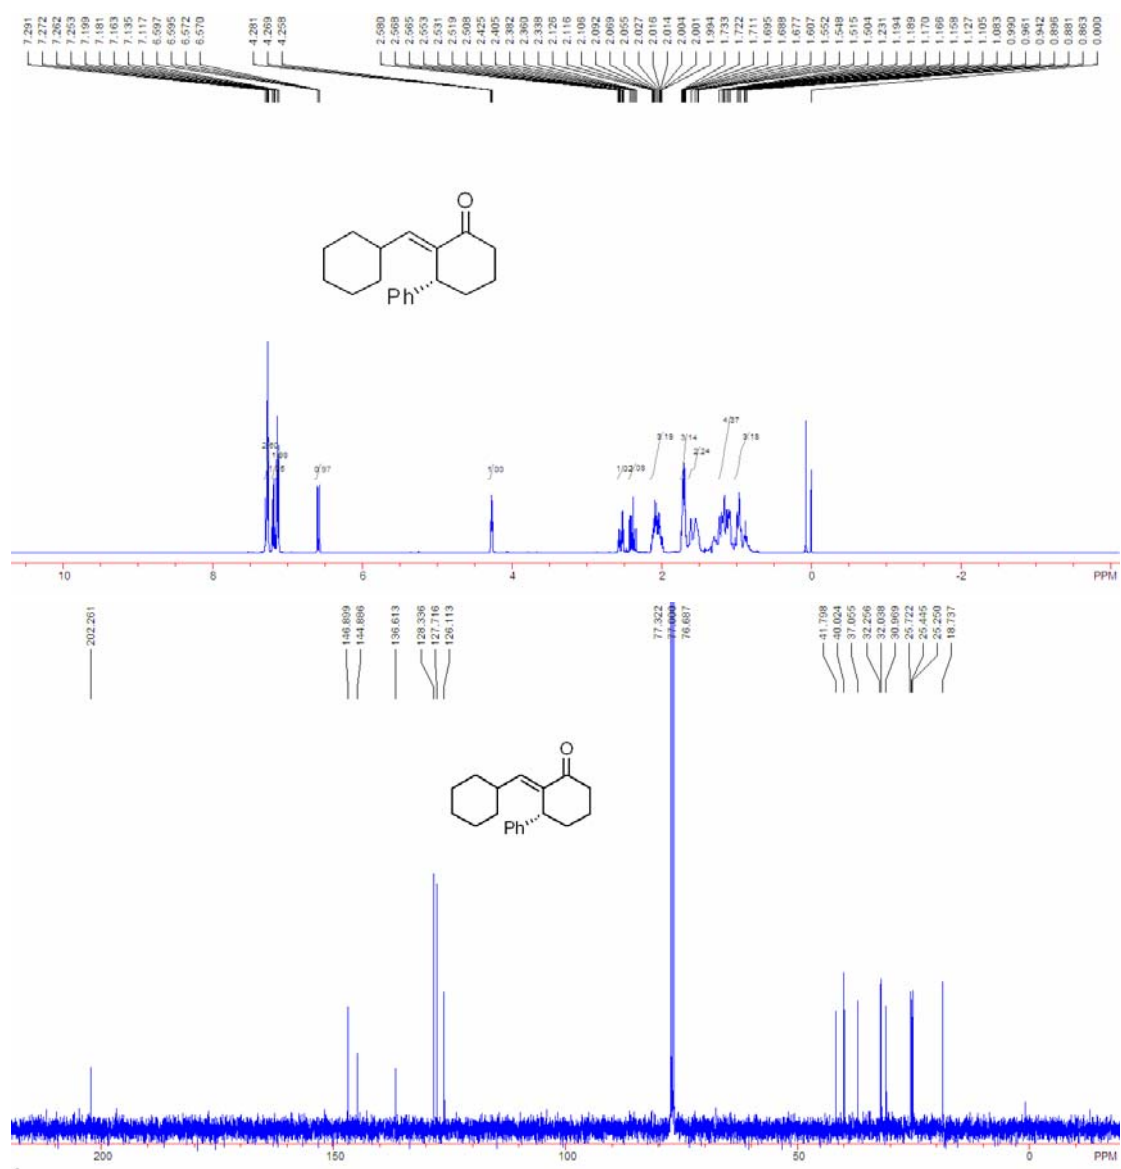

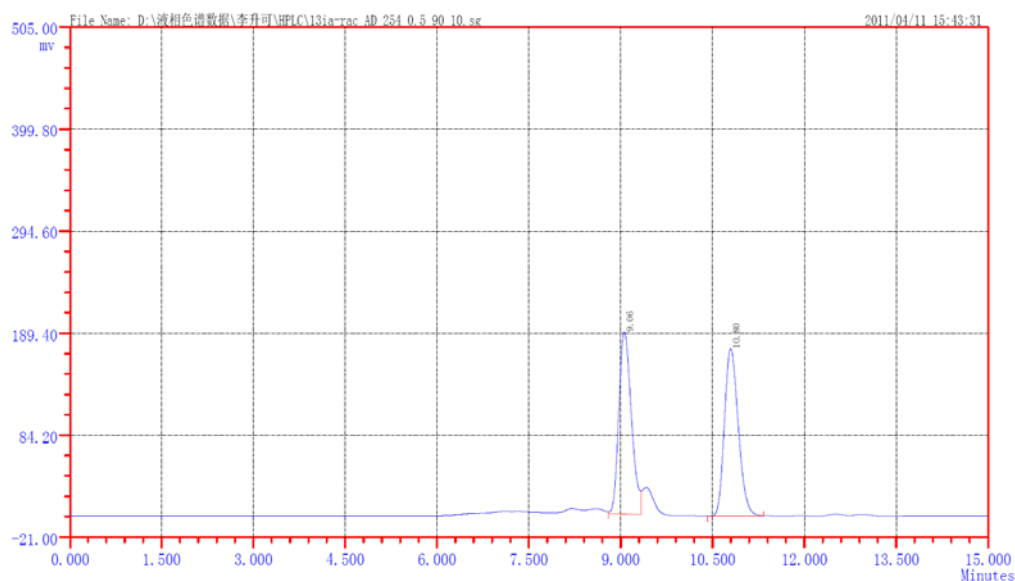

| ID     | 组分名           | 保留时间   | 峰高     | 峰面积       | 浓度             | 拖尾因子                   | 理论塔板 |
|--------|---------------|--------|--------|-----------|----------------|------------------------|------|
| 1      |               | 9.060  | 188157 | 2705002.5 | 49.8448        | 1.21                   | 7916 |
| 2      |               | 10.800 | 172797 | 2721842.9 | 50.1552        | 1.21                   | 9370 |
| Σ:     |               |        | 360954 | 5426845.4 | 100.0000       |                        |      |
| Sample | RetTime (min) | Hight  | Area   | Area (%)  | Tailing factor | Theoretical plates (N) |      |

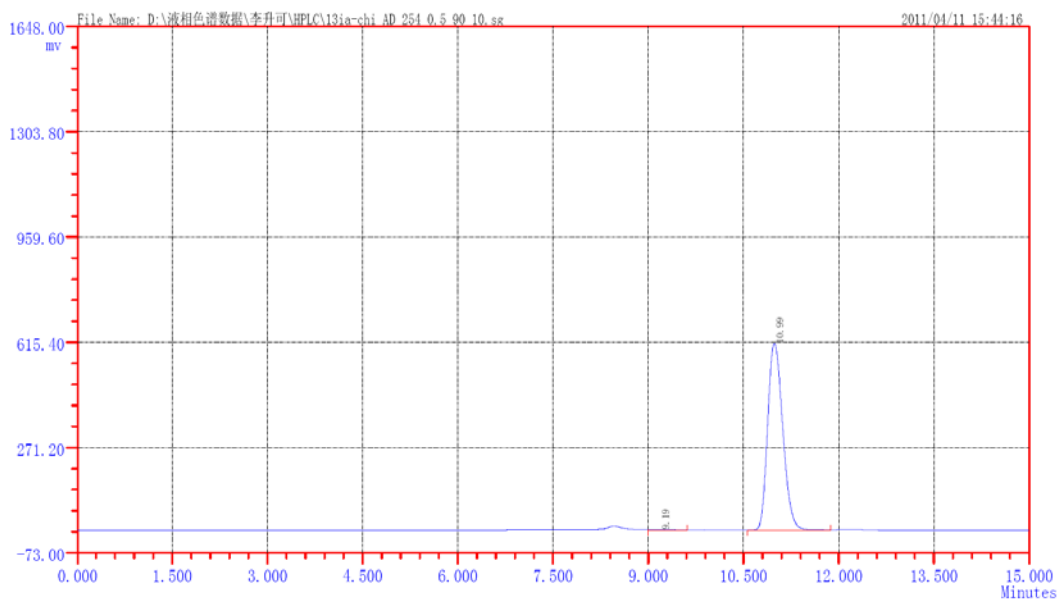

| ID     | 组分名           | 保留时间   | 峰高     | 峰面积        | 浓度             | 拖尾因子                   | 理论塔板 |
|--------|---------------|--------|--------|------------|----------------|------------------------|------|
| 1      |               | 9.188  | 2560   | 56874.3    | 0.5584         | 1.64                   | 3409 |
| 2      |               | 10.988 | 610482 | 10128416.2 | 99.4416        | 1.23                   | 8743 |
| Σ:     |               |        | 613042 | 10185290.5 | 100.0000       |                        |      |
| Sample | RetTime (min) | Hight  | Area   | Area (%)   | Tailing factor | Theoretical plates (N) |      |

(*R*)-2-(cyclohexyl(hydroxy)methyl)cyclohex-2-enone **3j**.<sup>[3,10]</sup>  $[\alpha]_{\text{D}}^{20} +32.6$  (*c* 0.5, CH<sub>2</sub>Cl<sub>2</sub>) for 92 % ee. <sup>1</sup>H NMR (400 MHz, CDCl<sub>3</sub>, TMS):  $\delta$  0.84-1.77 (m, 10H),

1.98-2.03 (m, 3H), 2.39-2.46 (m, 4H), 2.95 (br s, 1H), 3.87 (br s, 1H), 6.79 (t,  $J = 4.2$  Hz, 1H). Chiralcel OJ, hexane/*i*-PrOH = 90/10, 0.8 mL/min, 230 nm,  $t_{major} = 6.50$  min,  $t_{minor} = 7.17$  min.

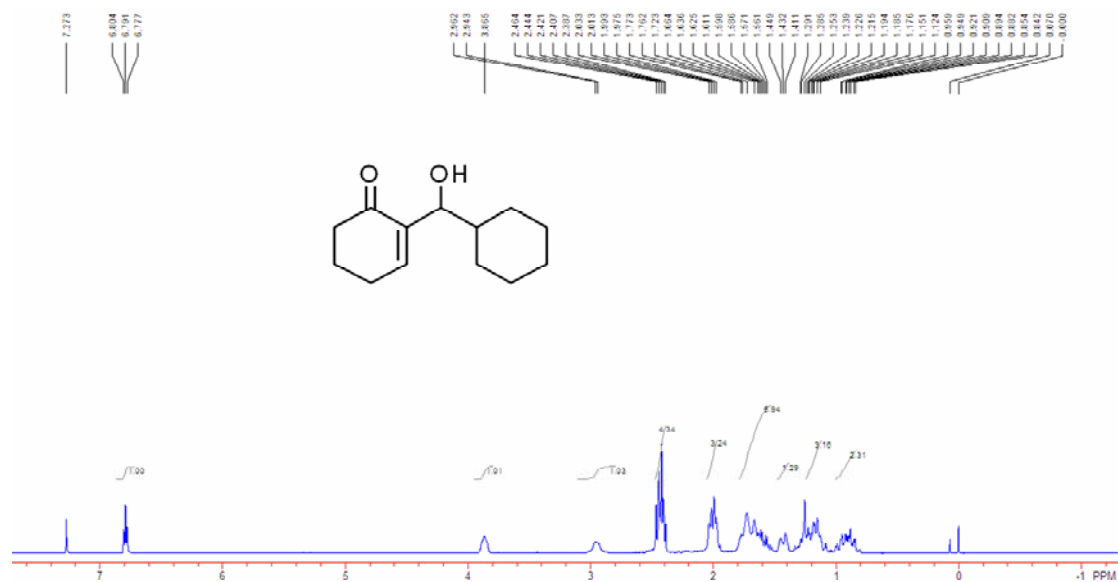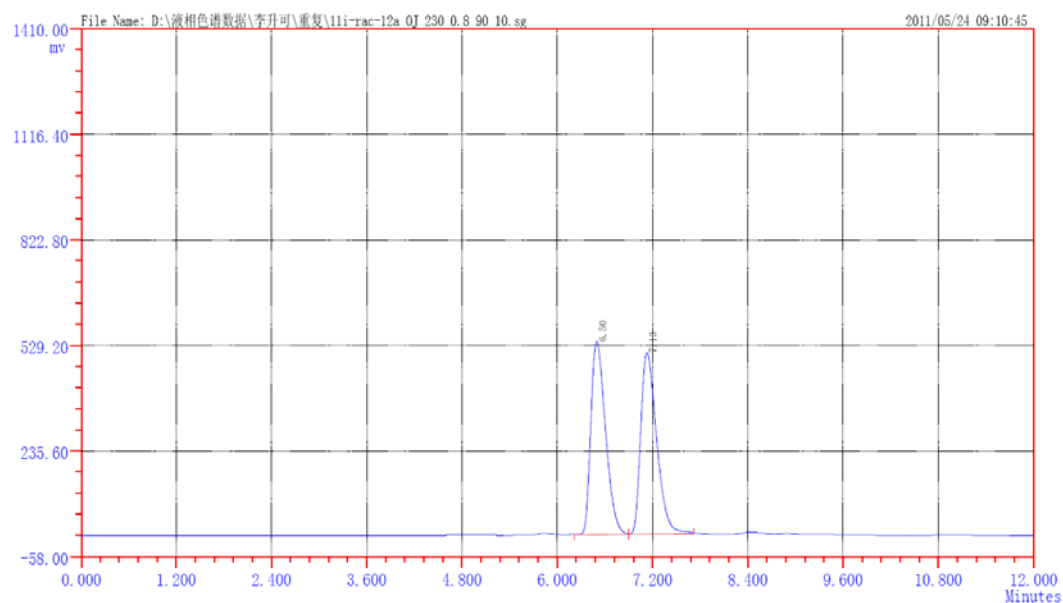

| ID     | 组分名           | 保留时间  | 峰高      | 峰面积        | 浓度             | 拖尾因子                   | 理论塔板 |
|--------|---------------|-------|---------|------------|----------------|------------------------|------|
| 1      |               | 6.498 | 536710  | 6916485.3  | 49.6328        | 1.43                   | 5068 |
| 2      |               | 7.133 | 504172  | 7018830.8  | 50.3672        | 1.46                   | 5233 |
| Σ:     |               |       | 1040882 | 13935316.1 | 100.0000       |                        |      |
| Sample | RetTime (min) | Hight | Area    | Area (%)   | Tailing factor | Theoretical plates (N) |      |

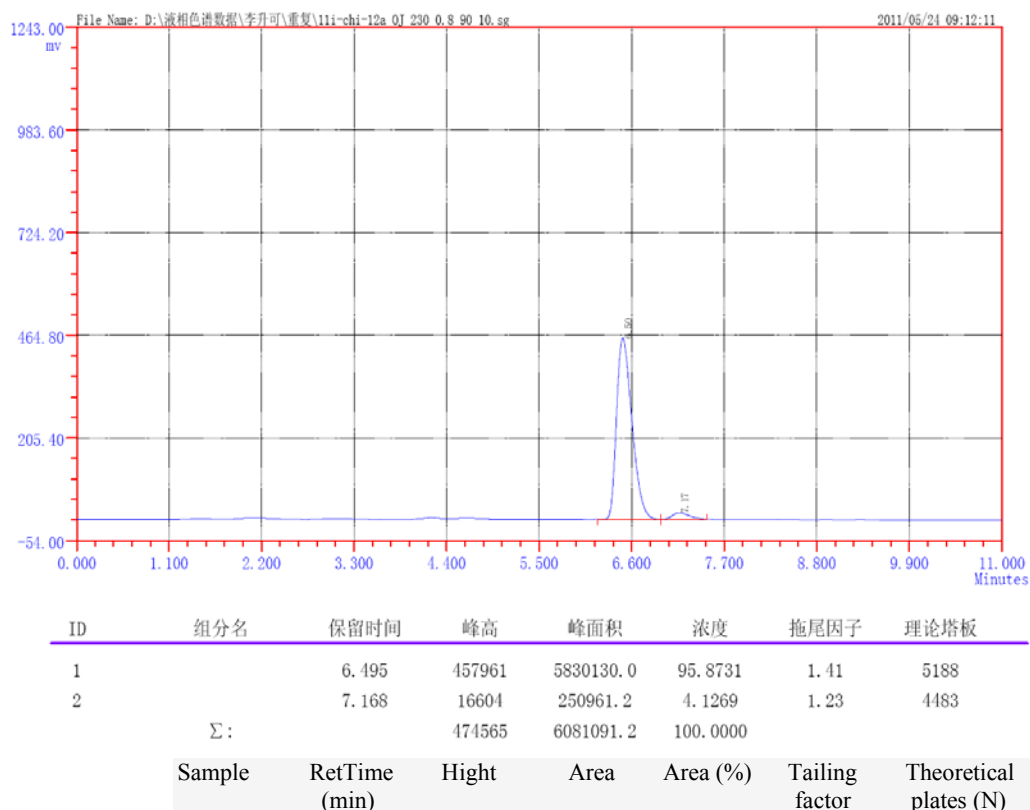

(*R,E*)-2-benzylidene-3-phenylcyclopentanone **5ka**<sup>[2]</sup> (Fig. 2, entry 18).  $[\alpha]_D^{20} +182.4$  (*c* 0.60, CHCl<sub>3</sub>) for 62 % ee. <sup>1</sup>H NMR (400 MHz, CDCl<sub>3</sub>, TMS):  $\delta$  2.16-2.19 (m, 1H), 2.34-2.45 (m, 3H), 4.53 (d, *J* = 6.8 Hz, 1H), 7.21-7.35 (m, 10H), 7.268 (d, *J* = 1.6 Hz, 1H). MS (EI) *m/z* (%): 249.1 (M+H, 100); HRMS (Micromass LCT) Calcd. for C<sub>18</sub>H<sub>17</sub>O: 249.1279; Found: 249.1283. Chiralcel AD, hexane/*i*-PrOH = 90/10, 0.8 mL/min, 254 nm, *t*<sub>major</sub> = 9.13 min, *t*<sub>minor</sub> = 9.83 min.



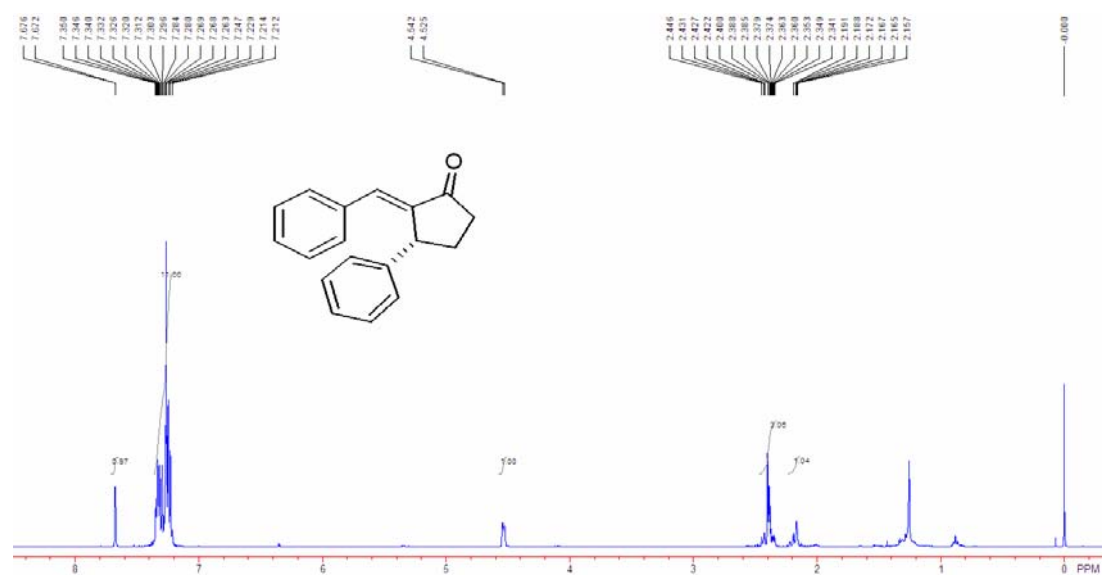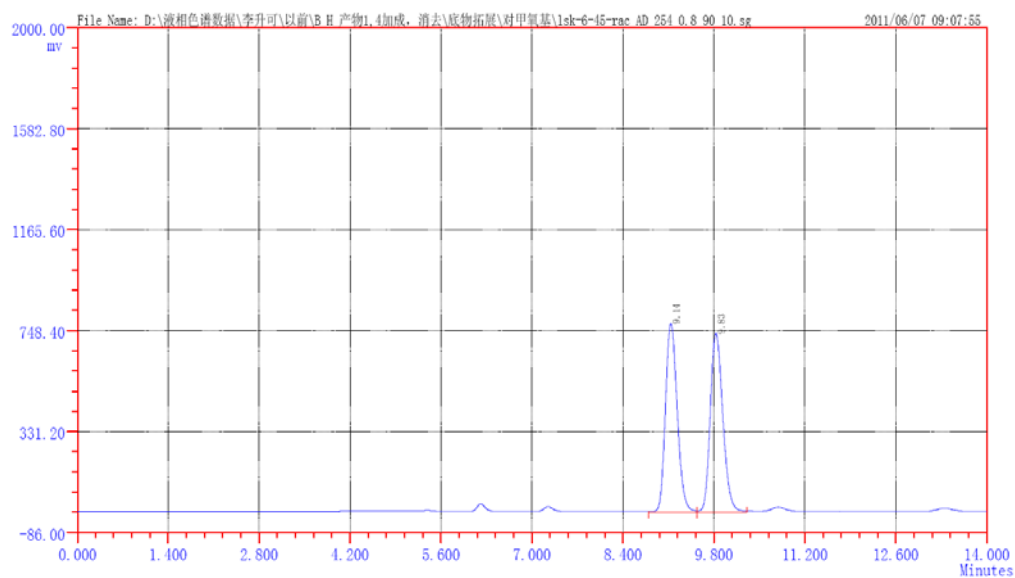

| ID         | 组分名 | 保留时间  | 峰高      | 峰面积        | 浓度       | 拖尾因子 | 理论塔板  |
|------------|-----|-------|---------|------------|----------|------|-------|
| 1          |     | 9.140 | 780325  | 9867804.1  | 49.7504  | 1.18 | 10412 |
| 2          |     | 9.833 | 737573  | 9966829.3  | 50.2496  | 1.21 | 10554 |
| $\Sigma$ : |     |       | 1517898 | 19834633.4 | 100.0000 |      |       |

| Sample | RetTime (min) | Hight | Area | Area (%) | Tailing factor | Theoretical plates (N) |
|--------|---------------|-------|------|----------|----------------|------------------------|
|--------|---------------|-------|------|----------|----------------|------------------------|

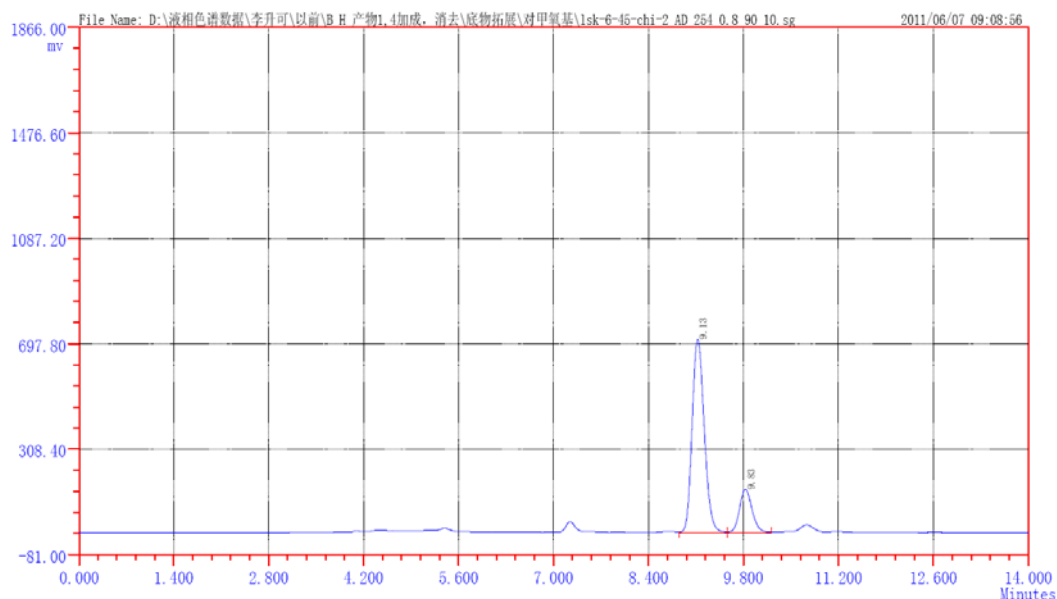

| ID | 组分名    | 保留时间          | 峰高     | 峰面积        | 浓度       | 拖尾因子           | 理论塔板                   |
|----|--------|---------------|--------|------------|----------|----------------|------------------------|
| 1  |        | 9.128         | 714281 | 8854272.9  | 81.1960  | 1.17           | 10808                  |
| 2  |        | 9.832         | 159785 | 2050545.0  | 18.8040  | 1.14           | 11698                  |
|    | Σ:     |               | 874066 | 10904817.9 | 100.0000 |                |                        |
|    | Sample | RetTime (min) | Hight  | Area       | Area (%) | Tailing factor | Theoretical plates (N) |

(*R*)-2-(hydroxy(phenyl)methyl)cyclopent-2-enone **3k**.<sup>[11]</sup>  $[\alpha]_D^{20}$  -7.8 (*c* 0.70, CH<sub>2</sub>Cl<sub>2</sub>) for 13 % ee. <sup>1</sup>H NMR (400 MHz, CDCl<sub>3</sub>, TMS): δ 2.45-2.47 (m, 2H), 2.58-2.60 (m, 2H), 3.48 (br s, 1H), 5.57 (s, 1H), 7.26-7.40 (m, 6H). Chiralcel OJ, hexane/*i*-PrOH = 90/10, 1.0 mL/min, 230 nm,  $t_{major}$  = 24.33 min,  $t_{minor}$  = 21.83 min.

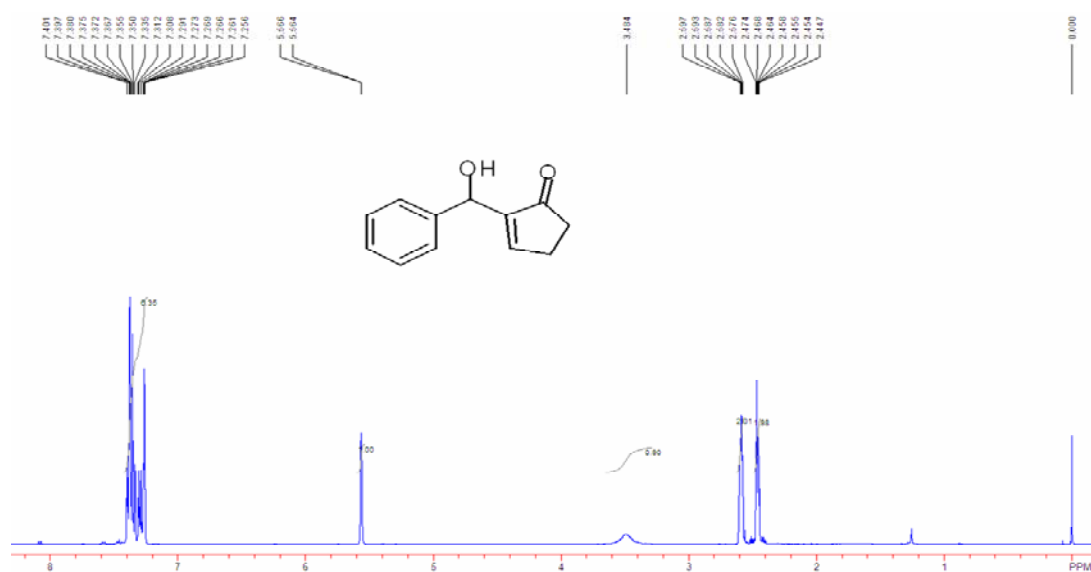

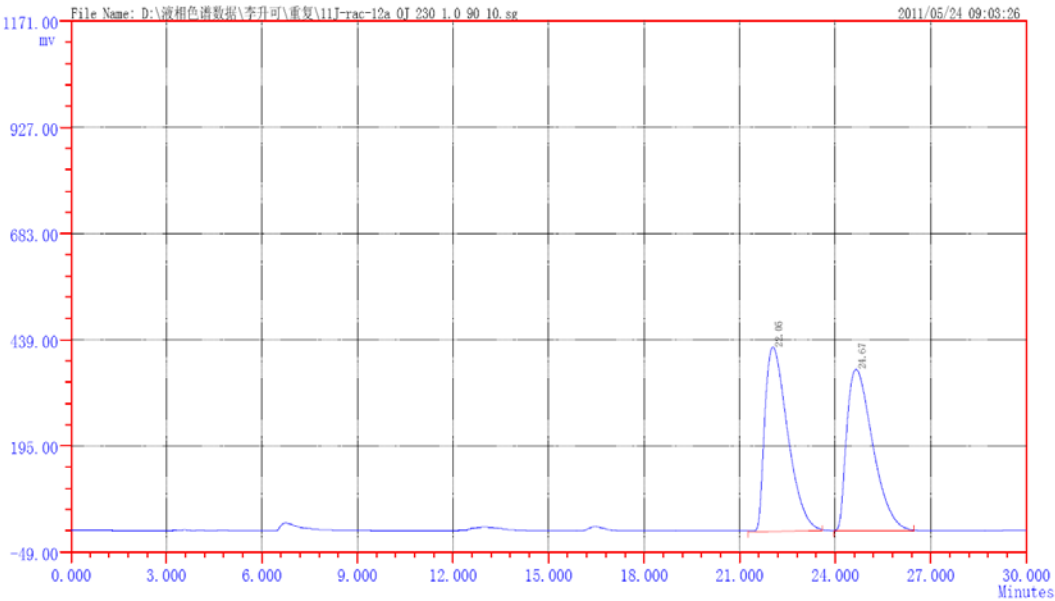

| ID     | 组分名 | 保留时间          | 峰高     | 峰面积        | 浓度       | 拖尾因子           | 理论塔板                   |
|--------|-----|---------------|--------|------------|----------|----------------|------------------------|
| 1      |     | 22.052        | 423743 | 21244118.6 | 50.1703  | 1.80           | 3856                   |
| 2      |     | 24.667        | 371384 | 21099901.6 | 49.8297  | 1.74           | 3757                   |
| Σ :    |     |               | 795127 | 42344020.2 | 100.0000 |                |                        |
| Sample |     | RetTime (min) | Hight  | Area       | Area (%) | Tailing factor | Theoretical plates (N) |

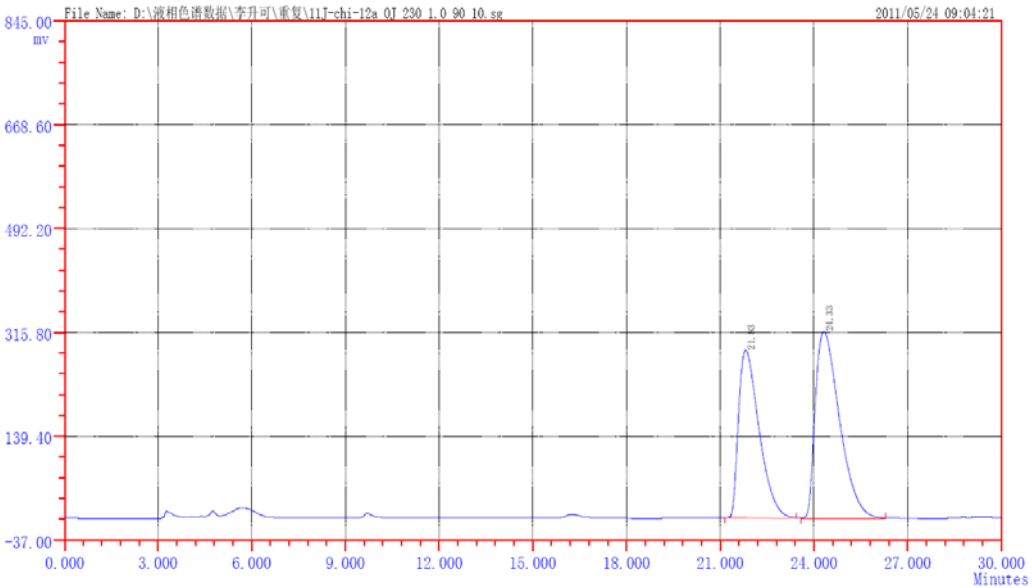

| ID     | 组分名 | 保留时间          | 峰高     | 峰面积        | 浓度       | 拖尾因子           | 理论塔板                   |
|--------|-----|---------------|--------|------------|----------|----------------|------------------------|
| 1      |     | 21.827        | 285360 | 13051870.0 | 43.3254  | 1.74           | 4539                   |
| 2      |     | 24.327        | 316985 | 17073319.3 | 56.6746  | 1.75           | 4066                   |
| Σ :    |     |               | 602345 | 30125189.3 | 100.0000 |                |                        |
| Sample |     | RetTime (min) | Hight  | Area       | Area (%) | Tailing factor | Theoretical plates (N) |

## References

1. P. Wessig, G. Müller, *Australian Journal of Chemistry* **61**, 569 (2008).
2. T. Gendrineau, J. –P. Genet, S. Darses, *Org. Lett.* **12**, 308 (2010).
3. N. T. McDougal, S. E. Schaus, *J. Am. Chem. Soc.* **125**, 12094 (2003).
4. Z. Shafiq, L. Liu, Z. Liu, D. Wang, Y. Chen, *Org. Lett.* **9**, 2525 (2007).
5. C. K.-W. Kwong, R. Huang, M. Zhang, M. Shi, P. H. Toy, *Chem. Eur. J.* **13**, 2369 (2007).
6. M. Shi, X.-G. Liu, *Org. Lett.* **10**, 1043 (2008).
7. (a) A. Berkessel, K. Roland, J. M. Neudoerfl, *Org. Lett.* **8**, 4195 (2006). (b) A. Lattanzi, *Synlett* 2106 (2007).
8. T. Kataoka, T. Iwama, S. Tsujiyama, T. Iwamura, S. Watanabe, *Tetrahedron* **54**, 11813 (1998).
9. (a) M. Bailey, I. Staton, P. R. Ashton, I. E. Marko, W. D. Ollis, *Tetrahedron: Asymmetry* **2**, 495 (1991). (b) M. Bailey, I. E. Marko, W. D. Ollis, *Tetrahedron Lett* **32**, 2687 (1991).
10. V. K. Aggarwal, A. Mereu, *Chem. Commun.* 2311 (1999).
11. A. Bugarin, B. T. Connell, *Chem. Commun.* 2644 (2010).

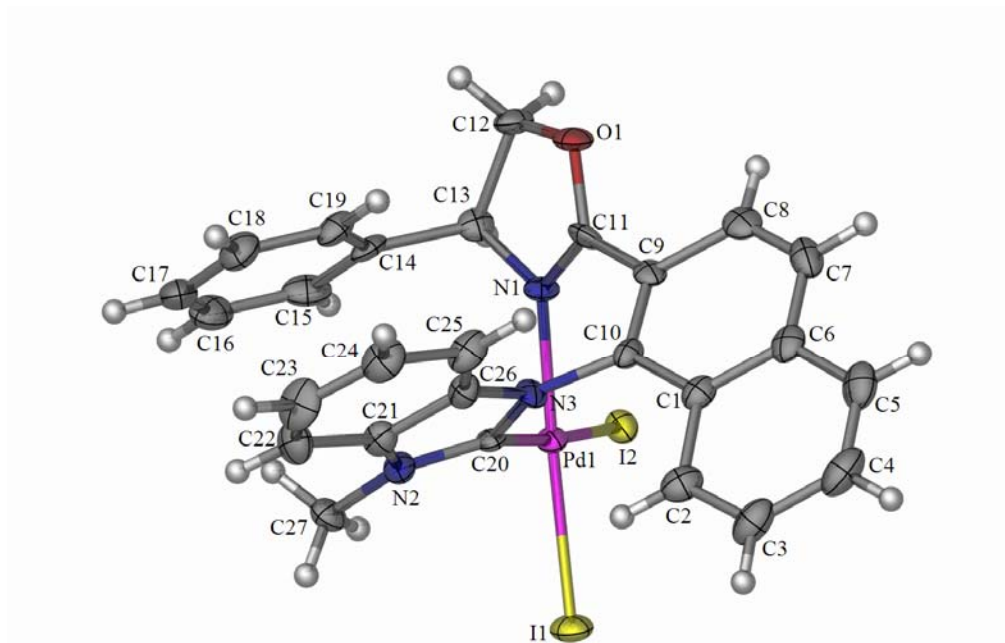

**Fig. S1.** X-ray crystal data of product (aS,S)-**2a**.

The crystal data of (aS,S)-**2a** have been deposited in CCDC with number 798781. Empirical formula:  $C_{27}H_{21}I_2N_3OPd$ ; Formula weight: 763.67; Temperature: 296(2) K; Wavelength: 0.71073 Å; Crystal system, space group: Orthorhombic, P2(1)2(1)2(1); Unit cell dimensions:  $a = 9.0426(5)$  Å,  $\alpha = 90$  deg.  $b = 15.0498(9)$  Å,  $\beta = 90$  deg.  $c = 19.5924(11)$  Å,  $\gamma = 90$  deg. Volume:  $2666.3(3)$  Å<sup>3</sup>; Z, Calculated density: 4, 1.902 Mg/m<sup>3</sup>; F(000): 1456; Crystal size: 0.39 x 0.23 x 0.09 mm; Final R indices [I>2sigma(I)],  $R_1 = 0.0496$ ,  $wR_2 = 0.1067$ ; R indices (all data)  $R_1 = 0.0645$ ,  $wR_2 = 0.1171$ . Selected bond distances (Å) and angles (°): I1-Pd1 2.5771(12), I2-Pd1 2.6709(+11), N1-Pd1 2.068(8), C20-Pd1 1.935(11), N2-C20 1.341(14), N3-C20 1.376(14), N1-C11 1.283(14), I1-Pd1-I2 96.67(4), N1-Pd1-C20 84.7(4), Pd1-C20-N3 122.8(8), C20-N3-C10-C1 -116.9(13), C20-N3-C10-C9 66.9(16), C10-C9-C11-N1 -45.1(18).

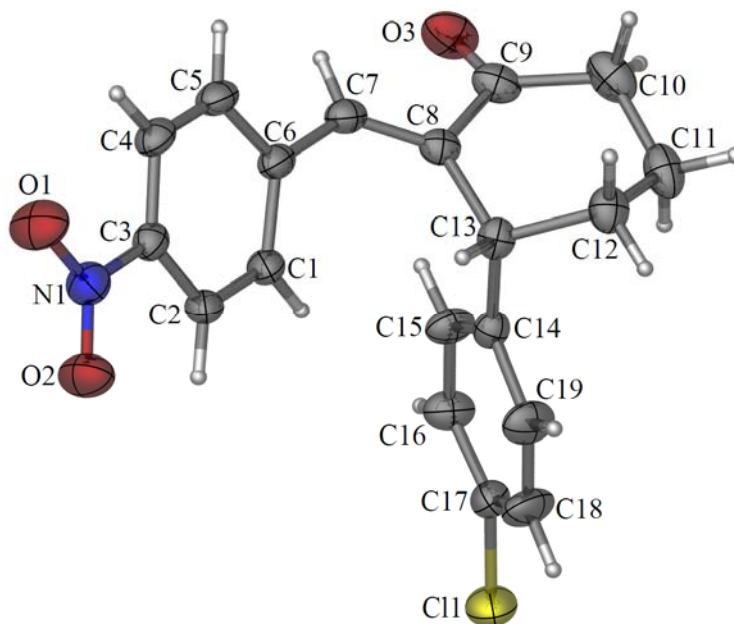

**Fig. S2.** X-ray crystal data of product (*R*)-**5hf**.

The crystal data of (*R*)-**5hf** have been deposited in CCDC with number 822886. Empirical formula: C<sub>19</sub>H<sub>16</sub>ClNO<sub>3</sub>; Formula weight: 341.78; Temperature: 296(2) K; Wavelength: 0.71073 Å; Crystal system, space group: Monoclinic, P2(1); Unit cell dimensions: a = 11.1242(5) Å, alpha = 90 deg. b = 6.2039(3) Å, beta = 111.5220(10), c = 13.0579(6) Å, gamma = 90 deg. Volume: 838.34(7) Å<sup>3</sup>; Z, Calculated density: 2, 1.354 Mg/m<sup>3</sup>; F(000): 356; Crystal size: 0.46 x 0.38 x 0.32 mm; Final R indices [I>2sigma(I)], R1 = 0.0337, wR2 = 0.0818; R indices (all data) R1 = 0.0394, wR2 = 0.0855.

A possible catalytic cycle for the kinetic resolution.

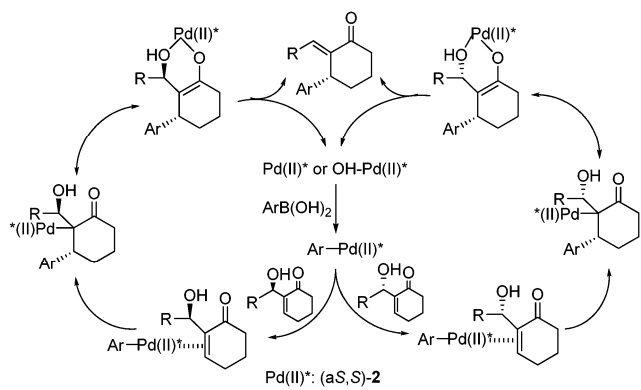

Supplement: c1cc15543a.pdf [file c1cc15543a.pdf]
